# Supplementary material for: Complexes of vertebrate TMC1/2 and CIB2/3 proteins form hair-cell mechanotransduction cation channels
Source: eLife journal article supplement (doi:10.7554/elife.89719), 2023-08-18
Supplement: fig1-data1 [file Figure1-cib23 cDNA brain 01242020_data[18].xls]

## Sheet: Sample Setup
Block Type	96well
Chemistry	SYBR_GREEN
Experiment File Name	C:\Applied Biosystems\StepOne Software v2.3\experiments\cib23 cDNA brain 01242020 ac.eds
Experiment Run End Time	Not Started
Instrument Type	steponeplus
Passive Reference	ROX
Well	Sample Name	Sample Color	Biogroup Name	Biogroup Color	Target Name	Target Color	Task	Reporter	Quencher	Comments
A1	wtwt	RGB(223,221,142)			cib2	RGB(208,243,98)	UNKNOWN	SYBR	None
A2	wtwt	RGB(223,221,142)			cib3	RGB(244,165,230)	UNKNOWN	SYBR	None
A3	wtwt	RGB(223,221,142)			hprt	RGB(255,191,168)	UNKNOWN	SYBR	None
A4	wtwt	RGB(223,221,142)			cib22	RGB(243,124,98)	UNKNOWN	SYBR	None
A5	wtwt	RGB(223,221,142)			cib32	RGB(192,165,244)	UNKNOWN	SYBR	None
A6	wtwt	RGB(223,221,142)			hprt2	RGB(249,128,228)	UNKNOWN	SYBR	None
A7
A8
A9
A10
A11
A12
B1	wtwt	RGB(223,221,142)			cib2	RGB(208,243,98)	UNKNOWN	SYBR	None
B2	wtwt	RGB(223,221,142)			cib3	RGB(244,165,230)	UNKNOWN	SYBR	None
B3	wtwt	RGB(223,221,142)			hprt	RGB(255,191,168)	UNKNOWN	SYBR	None
B4	wtwt	RGB(223,221,142)			cib22	RGB(243,124,98)	UNKNOWN	SYBR	None
B5	wtwt	RGB(223,221,142)			cib32	RGB(192,165,244)	UNKNOWN	SYBR	None
B6	wtwt	RGB(223,221,142)			hprt2	RGB(249,128,228)	UNKNOWN	SYBR	None
B7
B8
B9
B10
B11
B12
C1	wtwt	RGB(223,221,142)			cib2	RGB(208,243,98)	UNKNOWN	SYBR	None
C2	wtwt	RGB(223,221,142)			cib3	RGB(244,165,230)	UNKNOWN	SYBR	None
C3	wtwt	RGB(223,221,142)			hprt	RGB(255,191,168)	UNKNOWN	SYBR	None
C4	wtwt	RGB(223,221,142)			cib22	RGB(243,124,98)	UNKNOWN	SYBR	None
C5	wtwt	RGB(223,221,142)			cib32	RGB(192,165,244)	UNKNOWN	SYBR	None
C6	wtwt	RGB(223,221,142)			hprt2	RGB(249,128,228)	UNKNOWN	SYBR	None
C7
C8
C9
C10
C11
C12
D1	wtwt	RGB(223,221,142)			cib2	RGB(208,243,98)	NTC	SYBR	None
D2	wtwt	RGB(223,221,142)			cib3	RGB(244,165,230)	NTC	SYBR	None
D3	wtwt	RGB(223,221,142)			hprt	RGB(255,191,168)	NTC	SYBR	None
D4	wtwt	RGB(223,221,142)			cib22	RGB(243,124,98)	NTC	SYBR	None
D5	wtwt	RGB(223,221,142)			cib32	RGB(192,165,244)	NTC	SYBR	None
D6	wtwt	RGB(223,221,142)			hprt2	RGB(249,128,228)	NTC	SYBR	None
D7
D8
D9
D10
D11
D12
E1	homohomo	RGB(247,255,168)			cib2	RGB(208,243,98)	UNKNOWN	SYBR	None
E2	homohomo	RGB(247,255,168)			cib3	RGB(244,165,230)	UNKNOWN	SYBR	None
E3	homohomo	RGB(247,255,168)			hprt	RGB(255,191,168)	UNKNOWN	SYBR	None
E4	homohomo	RGB(247,255,168)			cib22	RGB(243,124,98)	UNKNOWN	SYBR	None
E5	homohomo	RGB(247,255,168)			cib32	RGB(192,165,244)	UNKNOWN	SYBR	None
E6	homohomo	RGB(247,255,168)			hprt2	RGB(249,128,228)	UNKNOWN	SYBR	None
E7
E8
E9
E10
E11
E12
F1	homohomo	RGB(247,255,168)			cib2	RGB(208,243,98)	UNKNOWN	SYBR	None
F2	homohomo	RGB(247,255,168)			cib3	RGB(244,165,230)	UNKNOWN	SYBR	None
F3	homohomo	RGB(247,255,168)			hprt	RGB(255,191,168)	UNKNOWN	SYBR	None
F4	homohomo	RGB(247,255,168)			cib22	RGB(243,124,98)	UNKNOWN	SYBR	None
F5	homohomo	RGB(247,255,168)			cib32	RGB(192,165,244)	UNKNOWN	SYBR	None
F6	homohomo	RGB(247,255,168)			hprt2	RGB(249,128,228)	UNKNOWN	SYBR	None
F7
F8
F9
F10
F11
F12
G1	homohomo	RGB(247,255,168)			cib2	RGB(208,243,98)	UNKNOWN	SYBR	None
G2	homohomo	RGB(247,255,168)			cib3	RGB(244,165,230)	UNKNOWN	SYBR	None
G3	homohomo	RGB(247,255,168)			hprt	RGB(255,191,168)	UNKNOWN	SYBR	None
G4	homohomo	RGB(247,255,168)			cib22	RGB(243,124,98)	UNKNOWN	SYBR	None
G5	homohomo	RGB(247,255,168)			cib32	RGB(192,165,244)	UNKNOWN	SYBR	None
G6	homohomo	RGB(247,255,168)			hprt2	RGB(249,128,228)	UNKNOWN	SYBR	None
G7
G8
G9
G10
G11
G12
H1	homohomo	RGB(247,255,168)			cib2	RGB(208,243,98)	NTC	SYBR	None
H2	homohomo	RGB(247,255,168)			cib3	RGB(244,165,230)	NTC	SYBR	None
H3	homohomo	RGB(247,255,168)			hprt	RGB(255,191,168)	NTC	SYBR	None
H4	homohomo	RGB(247,255,168)			cib22	RGB(243,124,98)	NTC	SYBR	None
H5	homohomo	RGB(247,255,168)			cib32	RGB(192,165,244)	NTC	SYBR	None
H6	homohomo	RGB(247,255,168)			hprt2	RGB(249,128,228)	NTC	SYBR	None
H7
H8
H9
H10
H11
H12

## Sheet: Results
Block Type	96well
Chemistry	SYBR_GREEN
Experiment File Name	C:\Applied Biosystems\StepOne Software v2.3\experiments\cib23 cDNA brain 01242020 ac.eds
Experiment Run End Time	Not Started
Instrument Type	steponeplus
Passive Reference	ROX
Well	Sample Name	Target Name	Task	Reporter	Quencher	RQ	RQ Min	RQ Max	Cт	Cт Mean	Cт SD	ΔCт	ΔCт Mean	ΔCт SE	HK Control ΔCт Mean	HK Control ΔCт SE	ΔΔCт	Automatic Ct Threshold	Ct Threshold	Automatic Baseline	Baseline Start	Baseline End	Efficiency	Tm1	Tm2	Tm3	Comments	AMPNC	HIGHSD	MTP
A1	wtwt	cib2	UNKNOWN	SYBR	None				20.8864	20.5263	0.311969							TRUE	0.0236852	TRUE	3	15	1	80.4922				N	N	N
A2	wtwt	cib3	UNKNOWN	SYBR	None	1	0.471359	2.12152	29.2944	28.6031	0.600754		8.07682	0.390824			0	TRUE	0.141048	TRUE	3	23	1	83.7717	79.5978			N	Y	Y
A3	wtwt	hprt	UNKNOWN	SYBR	None	1	0.698797	1.43103	16.8031	16.7086	0.0819705		-3.8177	0.186229			0	TRUE	0.0234192	TRUE	3	12	1	77.0632				N	N	N
A4	wtwt	cib22	UNKNOWN	SYBR	None	1	0.696838	1.43505	24.9368	25.0352	0.0914055		4.50886	0.187687			0	TRUE	1.01676	TRUE	3	16	1	80.6408				N	N	N
A5	wtwt	cib32	UNKNOWN	SYBR	None	1	0.506192	1.97553	26.8232	26.267	0.527399		5.74064	0.353777			0	TRUE	0.0268775	TRUE	3	23	1	83.9207				N	Y	N
A6	wtwt	hprt2	UNKNOWN	SYBR	None	1	0.704234	1.41998	18.3249	18.3352	0.0476237		-2.19109	0.182202			0	TRUE	0.0977656	TRUE	3	11	1	77.2133				N	N	N
B1	wtwt	cib2	UNKNOWN	SYBR	None				20.3548	20.5263	0.311969							TRUE	0.0236852	TRUE	3	16	1	80.4922				N	N	N
B2	wtwt	cib3	UNKNOWN	SYBR	None	1	0.471359	2.12152	28.3075	28.6031	0.600754		8.07682	0.390824			0	TRUE	0.141048	TRUE	3	21	1	83.1754				N	Y	N
B3	wtwt	hprt	UNKNOWN	SYBR	None	1	0.698797	1.43103	16.667	16.7086	0.0819705		-3.8177	0.186229			0	TRUE	0.0234192	TRUE	3	12	1	77.0632				N	N	N
B4	wtwt	cib22	UNKNOWN	SYBR	None	1	0.696838	1.43505	25.0513	25.0352	0.0914055		4.50886	0.187687			0	TRUE	1.01676	TRUE	3	16	1	80.4917				N	N	N
B5	wtwt	cib32	UNKNOWN	SYBR	None	1	0.506192	1.97553	25.7741	26.267	0.527399		5.74064	0.353777			0	TRUE	0.0268775	TRUE	3	22	1	83.7716				N	Y	N
B6	wtwt	hprt2	UNKNOWN	SYBR	None	1	0.704234	1.41998	18.2936	18.3352	0.0476237		-2.19109	0.182202			0	TRUE	0.0977656	TRUE	3	13	1	77.2133				N	N	N
C1	wtwt	cib2	UNKNOWN	SYBR	None				20.3378	20.5263	0.311969							TRUE	0.0236852	TRUE	3	16	1	80.3432				N	N	N
C2	wtwt	cib3	UNKNOWN	SYBR	None	1	0.471359	2.12152	28.2075	28.6031	0.600754		8.07682	0.390824			0	TRUE	0.141048	TRUE	3	23	1	83.3245				N	Y	N
C3	wtwt	hprt	UNKNOWN	SYBR	None	1	0.698797	1.43103	16.6558	16.7086	0.0819705		-3.8177	0.186229			0	TRUE	0.0234192	TRUE	3	11	1	77.0632				N	N	N
C4	wtwt	cib22	UNKNOWN	SYBR	None	1	0.696838	1.43505	25.1175	25.0352	0.0914055		4.50886	0.187687			0	TRUE	1.01676	TRUE	3	16	1	80.4917				N	N	N
C5	wtwt	cib32	UNKNOWN	SYBR	None	1	0.506192	1.97553	26.2037	26.267	0.527399		5.74064	0.353777			0	TRUE	0.0268775	TRUE	3	22	1	83.6226				N	Y	N
C6	wtwt	hprt2	UNKNOWN	SYBR	None	1	0.704234	1.41998	18.3872	18.3352	0.0476237		-2.19109	0.182202			0	TRUE	0.0977656	TRUE	3	12	1	77.0643				N	N	N
D1	wtwt	cib2	NTC	SYBR	None				37.1801									TRUE	0.0236852	TRUE	3	35	1	75.5731	64.244	81.0885		N	N	Y
D2	wtwt	cib3	NTC	SYBR	None				37.1427									TRUE	0.141048	TRUE	3	33	1	74.9768	63.7968			N	N	Y
D3	wtwt	hprt	NTC	SYBR	None				Undetermined									TRUE	0.0234192	TRUE	3	39	1	63.3492				N	N	N
D4	wtwt	cib22	NTC	SYBR	None				37.0062									TRUE	1.01676	TRUE	3	29	1	80.9389				N	N	N
D5	wtwt	cib32	NTC	SYBR	None				37.0744									TRUE	0.0268775	TRUE	3	35	1	62.7552	74.9775	87.1999		N	N	Y
D6	wtwt	hprt2	NTC	SYBR	None				Undetermined									TRUE	0.0977656	TRUE	3	35	1	63.3514	87.647			N	N	Y
E1	homohomo	cib2	UNKNOWN	SYBR	None				27.9719	27.7619	0.2308							TRUE	0.0236852	TRUE	3	25	1	80.4922				N	N	N
E2	homohomo	cib3	UNKNOWN	SYBR	None	393.06	256.185	603.064	26.9495	27.2201	0.308473		-0.541783	0.222429			-8.6186	TRUE	0.141048	TRUE	3	22	1	83.6226				N	N	N
E3	homohomo	hprt	UNKNOWN	SYBR	None	160.623	123.7	208.567	16.6159	16.6167	0.0446645		-11.1452	0.135725			-7.32754	TRUE	0.0234192	TRUE	3	13	1	77.0632				N	N	N
E4	homohomo	cib22	UNKNOWN	SYBR	None	0.557035	0.372174	0.833717	32.9295	33.1149	0.280104		5.35302	0.209545			0.844161	TRUE	1.01676	TRUE	3	24	1	80.4917				N	N	N
E5	homohomo	cib32	UNKNOWN	SYBR	None	325.799	236.77	448.303	24.9595	25.1547	0.171046		-2.60719	0.165857			-8.34784	TRUE	0.0268775	TRUE	3	22	1	83.7716				N	N	N
E6	homohomo	hprt2	UNKNOWN	SYBR	None	155.714	119.69	202.58	18.2825	18.2881	0.0529884		-9.47384	0.136719			-7.28276	TRUE	0.0977656	TRUE	3	13	1	77.2133				N	N	N
F1	homohomo	cib2	UNKNOWN	SYBR	None				27.5148	27.7619	0.2308							TRUE	0.0236852	TRUE	3	24	1	80.6413				N	N	N
F2	homohomo	cib3	UNKNOWN	SYBR	None	393.06	256.185	603.064	27.1549	27.2201	0.308473		-0.541783	0.222429			-8.6186	TRUE	0.141048	TRUE	3	22	1	81.9829	71.9955			N	N	Y
F3	homohomo	hprt	UNKNOWN	SYBR	None	160.623	123.7	208.567	16.5724	16.6167	0.0446645		-11.1452	0.135725			-7.32754	TRUE	0.0234192	TRUE	3	13	1	77.0632				N	N	N
F4	homohomo	cib22	UNKNOWN	SYBR	None	0.557035	0.372174	0.833717	33.4372	33.1149	0.280104		5.35302	0.209545			0.844161	TRUE	1.01676	TRUE	3	25	1	80.6408				N	N	N
F5	homohomo	cib32	UNKNOWN	SYBR	None	325.799	236.77	448.303	25.2267	25.1547	0.171046		-2.60719	0.165857			-8.34784	TRUE	0.0268775	TRUE	3	22	1	83.6226				N	N	N
F6	homohomo	hprt2	UNKNOWN	SYBR	None	155.714	119.69	202.58	18.2381	18.2881	0.0529884		-9.47384	0.136719			-7.28276	TRUE	0.0977656	TRUE	3	13	1	77.2133				N	N	N
G1	homohomo	cib2	UNKNOWN	SYBR	None				27.7991	27.7619	0.2308							TRUE	0.0236852	TRUE	3	25	1	80.6413				N	N	N
G2	homohomo	cib3	UNKNOWN	SYBR	None	393.06	256.185	603.064	27.556	27.2201	0.308473		-0.541783	0.222429			-8.6186	TRUE	0.141048	TRUE	3	22	1	83.7717	68.8651	82.132		N	N	Y
G3	homohomo	hprt	UNKNOWN	SYBR	None	160.623	123.7	208.567	16.6618	16.6167	0.0446645		-11.1452	0.135725			-7.32754	TRUE	0.0234192	TRUE	3	13	1	77.2123				N	N	N
G4	homohomo	cib22	UNKNOWN	SYBR	None	0.557035	0.372174	0.833717	32.9781	33.1149	0.280104		5.35302	0.209545			0.844161	TRUE	1.01676	TRUE	3	25	1	80.6408				N	N	N
G5	homohomo	cib32	UNKNOWN	SYBR	None	325.799	236.77	448.303	25.2781	25.1547	0.171046		-2.60719	0.165857			-8.34784	TRUE	0.0268775	TRUE	3	22	1	83.7716				N	N	N
G6	homohomo	hprt2	UNKNOWN	SYBR	None	155.714	119.69	202.58	18.3436	18.2881	0.0529884		-9.47384	0.136719			-7.28276	TRUE	0.0977656	TRUE	3	13	1	77.2133				N	N	N
H1	homohomo	cib2	NTC	SYBR	None				31.8197									TRUE	0.0236852	TRUE	3	30	1	81.0885				Y	N	N
H2	homohomo	cib3	NTC	SYBR	None				32.6016									TRUE	0.141048	TRUE	3	28	1	81.0885				Y	N	N
H3	homohomo	hprt	NTC	SYBR	None				37.1338									TRUE	0.0234192	TRUE	3	35	1	85.4109	73.7838	64.5417		N	N	Y
H4	homohomo	cib22	NTC	SYBR	None				34.0136									TRUE	1.01676	TRUE	3	27	1	80.6408				Y	N	N
H5	homohomo	cib32	NTC	SYBR	None				36.9498									TRUE	0.0268775	TRUE	3	35	1	63.3514	87.7961	81.834		N	N	Y
H6	homohomo	hprt2	NTC	SYBR	None				37.1037									TRUE	0.0977656	TRUE	3	33	1	87.498	64.0967			N	N	Y
Analysis Type	Singleplex
Endogenous Control	cib2
RQ Min/Max Confidence Level	95.0
Reference Sample	wtwt

## Sheet: Raw Data
Block Type	96well
Chemistry	SYBR_GREEN
Experiment File Name	C:\Applied Biosystems\StepOne Software v2.3\experiments\cib23 cDNA brain 01242020 ac.eds
Experiment Run End Time	Not Started
Instrument Type	steponeplus
Passive Reference	ROX
Well	Cycle	BLUE	GREEN	YELLOW	RED
A1	1	9385.9	6067.1	15334.6	33237.6
A2	1	14888.5	9116.4	16957.8	33320.1
A3	1	4621.2	2940.1	11530.8	27002.1
A4	1	9047.6	5772.9	14173.7	29988
A5	1	14033.3	8904.1	15999	31057.7
A6	1	5583.8	3560.1	13215.3	30333.3
A7	1	-3771.2	-2162.9	-1758.5	-2192.3
A8	1	-3195.7	-1745.8	-1315.6	-1442.8
A9	1	-2437.6	-1229.2	-914.398	-1053.4
A10	1	-3951.3	-2289.2	-1984	-2196.6
A11	1	-3441.4	-1983.1	-1639.6	-1857.7
A12	1	-3557	-1969.9	-1800.2	-1880.2
B1	1	8783.9	5572.5	14687.3	31979.6
B2	1	16647.8	10384.1	17789.9	33739.7
B3	1	6484	3899.7	13511.2	30751.7
B4	1	8827.6	5357.5	13684.8	29230
B5	1	16957.3	10393.3	18233.5	34961
B6	1	4478.4	2779.5	11732.5	27644.9
B7	1	-2578.2	-1316.9	-900.801	-996.602
B8	1	-2386.1	-1286.1	-917	-1075.6
B9	1	-3460.3	-1938.8	-1464	-1621.2
B10	1	-2868.5	-1616.1	-1252.1	-1487
B11	1	-3482.6	-1910.7	-1378.6	-1515.6
B12	1	-3419.2	-1919.4	-1539.6	-1603.9
C1	1	9678.3	5935	15269.4	33172.5
C2	1	14900.4	9074.6	16489.3	32183.1
C3	1	6257.2	3585.8	13097.7	29981.5
C4	1	10258.9	6217.4	15421.4	32966.8
C5	1	13039.5	8016.5	15156.1	30001.1
C6	1	6656.3	3973.8	14064.6	32184.1
C7	1	-4669.8	-2374.6	-1622.9	-1559.7
C8	1	-3082.7	-1720	-1294.9	-1487.9
C9	1	-2454.1	-1374.6	-1002.1	-1154.9
C10	1	-3874.6	-2283	-1839.1	-2026.4
C11	1	-3871.7	-2213	-1758.6	-1920.4
C12	1	-3483	-1992.9	-1655.3	-1875.8
D1	1	3283.8	2274.5	12601.3	30558.5
D2	1	9265.8	5733.8	15285.6	33136.3
D3	1	-253.199	-194.5	12308.9	32784.8
D4	1	3648.2	2410.7	13405	32277.4
D5	1	9516.4	5948.3	16217.2	35317.8
D6	1	933.5	647.801	11724.2	29927.7
D7	1	-2655.9	-1450.6	-1045	-1159
D8	1	-3100.1	-1742.6	-1347.1	-1540.5
D9	1	-3061.6	-1716.9	-1339.2	-1520.9
D10	1	-3142.5	-1688.5	-1235.8	-1371.8
D11	1	-2625.6	-1441.9	-1119.1	-1295
D12	1	-2898.5	-1609.8	-1276.9	-1410.3
E1	1	9278	5827.5	14826.4	32021.5
E2	1	14809.5	9012.5	16589	32291
E3	1	5207.6	3151.3	13587.5	32002.8
E4	1	9307.1	5844	15012.8	32071.2
E5	1	17099.8	10535.9	18438.2	35398.8
E6	1	5987.5	3691.1	13318.4	30382.9
E7	1	-2065.6	-1053.7	-650.602	-733.5
E8	1	-2196.4	-1180.8	-880.699	-1055.1
E9	1	-2208.6	-1297.7	-1013.9	-1193
E10	1	-3500	-2010.5	-1583.8	-1619.8
E11	1	-2447.2	-1308.3	-1027.5	-1170.7
E12	1	-2753.8	-1504.5	-1228.5	-1368.9
F1	1	7645.4	4939.8	14423.9	32140.8
F2	1	14826	9141.9	16940.6	33281.5
F3	1	5442.2	3278.9	13713.9	32183.9
F4	1	9600.9	5972.3	15323.1	32721.1
F5	1	15685.7	10092	17455.7	33016.9
F6	1	5369.4	3324.5	12603.3	29008.3
F7	1	-3211.7	-1826.8	-1451.4	-1611.4
F8	1	-1849.7	-1034.2	-856.102	-1101.6
F9	1	-3130.4	-1767.4	-1397.1	-1522.4
F10	1	-3283.6	-1864.9	-1508.1	-1602
F11	1	-3679	-2028.2	-1515.4	-1518.6
F12	1	-2897.8	-1547.8	-1236.7	-1243.9
G1	1	8290.5	5288.1	14645.3	32587.6
G2	1	13267.5	8335.2	16090.4	32052
G3	1	6741.5	4189.6	15068	34348.6
G4	1	9978.9	6157.2	15806.7	34007.8
G5	1	14732.3	9145	16564.7	32240
G6	1	6570.2	4026	14697	33548.3
G7	1	-3295.6	-1852.3	-1236.7	-1118
G8	1	-1553.3	-737.199	-527	-642.398
G9	1	-3306.5	-1881	-1436.4	-1504.9
G10	1	-3485.5	-1986.4	-1599.4	-1688.4
G11	1	-3357.3	-1849.3	-1395.4	-1375.6
G12	1	-2507.6	-1230.5	-891.102	-865.301
H1	1	3396.2	2325.1	13476.8	33273.8
H2	1	8698.1	5604.8	14439.9	31551.8
H3	1	-376.102	-132.199	11759.6	31667.5
H4	1	3274.5	2233.6	13040.9	31958.4
H5	1	9787.6	6432.2	15695.4	33060.9
H6	1	-174.102	-25.8984	11735.6	31175.3
H7	1	-3686.8	-2047	-1677.4	-1993.7
H8	1	-3953.9	-2247	-1854.5	-2108.7
H9	1	-1265.4	-489	-309.199	-551.602
H10	1	-3987.6	-2288.2	-1943	-2191
H11	1	-2332.8	-1260.8	-1097.7	-1308.2
H12	1	-2885.2	-1519.1	-1270.7	-1453.8
A1	2	9667.9	6175.1	15278.6	32877.6
A2	2	15249.5	9308.4	16989.8	33153.1
A3	2	5049.2	3179.1	11645.8	26956.1
A4	2	9565.6	6045.9	14303.7	30029
A5	2	14643.3	9270.1	16223	31222.7
A6	2	6083.8	3807.1	13318.3	30323.3
A7	2	-3845.2	-2217.9	-1776.5	-2210.3
A8	2	-3280.7	-1802.8	-1357.6	-1478.8
A9	2	-2489.6	-1270.2	-916.398	-1074.4
A10	2	-4006.3	-2326.2	-2011	-2219.6
A11	2	-3554.4	-2061.1	-1688.6	-1906.7
A12	2	-3609	-2029.9	-1832.2	-1897.2
B1	2	9486.9	5970.5	15010.3	32347.6
B2	2	17888.8	11150.1	18083.9	33555.7
B3	2	6932	4132.7	13521.2	30438.7
B4	2	9256.6	5620.5	13743.8	29057
B5	2	18674.3	11446.3	18693.5	34930
B6	2	4519.4	2811.5	11445.5	26882.9
B7	2	-2617.2	-1342.9	-904.801	-1029.6
B8	2	-2462.1	-1329.1	-944	-1098.6
B9	2	-3511.3	-1976.8	-1485	-1641.2
B10	2	-2949.5	-1688.1	-1276.1	-1521
B11	2	-3522.6	-1941.7	-1380.6	-1506.6
B12	2	-3516.2	-1983.4	-1583.6	-1662.9
C1	2	10233.3	6242	15375.4	33037.5
C2	2	15917.4	9693.6	16695.3	31939.1
C3	2	6632.2	3767.8	13034.7	29539.5
C4	2	11254.9	6804.4	15673.4	32922.8
C5	2	14143.5	8683.5	15507.1	30010.1
C6	2	7102.3	4197.8	14075.6	31929.1
C7	2	-4748.8	-2414.6	-1653.9	-1608.7
C8	2	-3152.7	-1757	-1329.9	-1530.9
C9	2	-2490.1	-1394.6	-1028.1	-1148.9
C10	2	-3944.6	-2313	-1871.1	-2064.4
C11	2	-3984.7	-2296	-1809.6	-1980.4
C12	2	-3577	-2018.9	-1701.3	-1917.8
D1	2	3404.8	2335.5	12577.3	30461.5
D2	2	10442.8	6499.8	15569.6	32937.3
D3	2	-106.199	-102.5	12204.9	32396.8
D4	2	4266.2	2796.7	13553	32111.4
D5	2	10589.4	6643.3	16294.2	34614.8
D6	2	993.5	682.801	11584.2	29512.7
D7	2	-2722.9	-1474.6	-1083	-1198
D8	2	-3216.1	-1799.6	-1397.1	-1579.5
D9	2	-3098.6	-1761.9	-1371.2	-1565.9
D10	2	-3191.5	-1714.5	-1265.8	-1389.8
D11	2	-2700.6	-1512.9	-1174.1	-1329
D12	2	-2978.5	-1661.8	-1312.9	-1441.3
E1	2	9523	5934.5	14824.4	31879.5
E2	2	16418.5	9980.5	17010	32178
E3	2	5534.6	3355.3	13547.5	31681.8
E4	2	10011.1	6262	15186.8	31986.2
E5	2	18623.8	11428.9	18740.2	35028.8
E6	2	6390.5	3886.1	13367.4	30202.9
E7	2	-2148.6	-1083.7	-692.602	-776.5
E8	2	-2273.4	-1228.8	-920.699	-1084.1
E9	2	-2266.6	-1317.7	-1055.9	-1195
E10	2	-3566	-2033.5	-1608.8	-1637.8
E11	2	-2515.2	-1365.3	-1043.5	-1205.7
E12	2	-2815.8	-1538.5	-1247.5	-1394.9
F1	2	8096.4	5152.8	14566.9	32194.8
F2	2	16264	10018.9	17314.6	33175.5
F3	2	5836.2	3488.9	13776.9	32012.9
F4	2	10390.9	6459.3	15556.1	32712.1
F5	2	16693.7	10708	17885.7	33316.9
F6	2	5793.4	3531.5	12689.3	28923.3
F7	2	-3262.7	-1857.8	-1489.4	-1611.4
F8	2	-1876.7	-1056.2	-876.102	-1098.6
F9	2	-3189.4	-1790.4	-1399.1	-1536.4
F10	2	-3366.6	-1929.9	-1545.1	-1650
F11	2	-3741	-2093.2	-1552.4	-1561.6
F12	2	-2980.8	-1641.8	-1242.7	-1301.9
G1	2	8999.5	5668.1	14959.3	32849.6
G2	2	14936.5	9326.2	16633.4	32285
G3	2	7036.5	4373.6	15003	33961.6
G4	2	10786.9	6607.2	15979.7	33805.8
G5	2	15836.3	9858	16861.7	32169
G6	2	6906.2	4220	14632	33127.3
G7	2	-3372.6	-1895.3	-1285.7	-1160
G8	2	-1617.3	-789.199	-568	-673.398
G9	2	-3414.5	-1962	-1483.4	-1543.9
G10	2	-3551.5	-2022.4	-1631.4	-1724.4
G11	2	-3436.3	-1913.3	-1428.4	-1370.6
G12	2	-2589.6	-1293.5	-925.102	-899.301
H1	2	3469.2	2357.1	13409.8	33051.8
H2	2	8686.1	5580.8	14386.9	31416.8
H3	2	-266.102	-68.1992	11893.6	31896.5
H4	2	3528.5	2372.6	13290.9	32408.4
H5	2	10181.6	6692.2	15901.4	33319.9
H6	2	60.8984	94.1016	11891.6	31451.3
H7	2	-3748.8	-2086	-1693.4	-1999.7
H8	2	-4046.9	-2300	-1893.5	-2151.7
H9	2	-1357.4	-532	-357.199	-575.602
H10	2	-4052.6	-2347.2	-1956	-2207
H11	2	-2387.8	-1311.8	-1116.7	-1341.2
H12	2	-2940.2	-1563.1	-1296.7	-1471.8
A1	3	10132.9	6437.1	15425.6	32967.6
A2	3	15830.5	9596.4	17178.8	33256.1
A3	3	5388.2	3345.1	11674.8	26893.1
A4	3	10042.6	6285.9	14434.7	30062
A5	3	15171.3	9557.1	16379	31268.7
A6	3	6602.8	4105.1	13541.3	30549.3
A7	3	-3925.2	-2247.9	-1813.5	-2243.3
A8	3	-3332.7	-1821.8	-1394.6	-1514.8
A9	3	-2516.6	-1264.2	-943.398	-1086.4
A10	3	-4043.3	-2329.2	-2026	-2241.6
A11	3	-3606.4	-2092.1	-1718.6	-1952.7
A12	3	-3667	-2061.9	-1849.2	-1927.2
B1	3	10020.9	6252.5	15217.3	32449.6
B2	3	18120.8	11233.1	18084.9	33450.7
B3	3	7248	4293.7	13592.2	30366.7
B4	3	9644.6	5795.5	13920.8	29230
B5	3	19023.3	11623.3	18747.5	34850
B6	3	4593.4	2826.5	11310.5	26556.9
B7	3	-2654.2	-1358.9	-941.801	-1038.6
B8	3	-2534.1	-1384.1	-989	-1143.6
B9	3	-3565.3	-1989.8	-1520	-1643.2
B10	3	-3001.5	-1712.1	-1294.1	-1534
B11	3	-3562.6	-1971.7	-1405.6	-1549.6
B12	3	-3561.2	-2020.4	-1617.6	-1684.9
C1	3	10803.3	6555	15587.4	33250.5
C2	3	16063.4	9756.6	16667.3	31762.1
C3	3	6879.2	3880.8	13014.7	29381.5
C4	3	11564.9	6960.4	15749.4	32898.8
C5	3	14196.5	8687.5	15405.1	29767.1
C6	3	7404.3	4377.8	14122.6	31866.1
C7	3	-4828.8	-2479.6	-1705.9	-1643.7
C8	3	-3209.7	-1827	-1388.9	-1549.9
C9	3	-2507.1	-1395.6	-1020.1	-1169.9
C10	3	-3963.6	-2341	-1903.1	-2085.4
C11	3	-4025.7	-2333	-1829.6	-2005.4
C12	3	-3640	-2084.9	-1729.3	-1924.8
D1	3	3596.8	2438.5	12669.3	30552.5
D2	3	10361.8	6439.8	15475.6	32763.3
D3	3	-32.1992	-77.5	12221.9	32391.8
D4	3	4272.2	2799.7	13499	32046.4
D5	3	10806.4	6763.3	16476.2	34917.8
D6	3	985.5	658.801	11557.2	29426.7
D7	3	-2760.9	-1510.6	-1115	-1206
D8	3	-3308.1	-1877.6	-1432.1	-1614.5
D9	3	-3118.6	-1759.9	-1371.2	-1563.9
D10	3	-3212.5	-1743.5	-1309.8	-1425.8
D11	3	-2740.6	-1521.9	-1178.1	-1364
D12	3	-3034.5	-1693.8	-1360.9	-1476.3
E1	3	9975	6179.5	15005.4	32036.5
E2	3	16725.5	10177.5	17072	32157
E3	3	5873.6	3504.3	13650.5	31740.8
E4	3	10238.1	6381	15240.8	31998.2
E5	3	18929.8	11606.9	18850.2	35172.8
E6	3	6582.5	4006.1	13358.4	30111.9
E7	3	-2209.6	-1133.7	-736.602	-798.5
E8	3	-2280.4	-1257.8	-924.699	-1120.1
E9	3	-2306.6	-1333.7	-1052.9	-1219
E10	3	-3569	-2056.5	-1603.8	-1641.8
E11	3	-2550.2	-1401.3	-1085.5	-1234.7
E12	3	-2866.8	-1577.5	-1273.5	-1430.9
F1	3	8609.4	5423.8	14772.9	32417.8
F2	3	16487	10129.9	17367.6	33173.5
F3	3	6103.2	3614.9	13806.9	31975.9
F4	3	10699.9	6610.3	15657.1	32813.1
F5	3	16855.7	10800	17874.7	33201.9
F6	3	5973.4	3632.5	12715.3	28870.3
F7	3	-3298.7	-1906.8	-1521.4	-1646.4
F8	3	-1910.7	-1086.2	-907.102	-1125.6
F9	3	-3187.4	-1784.4	-1424.1	-1552.4
F10	3	-3385.6	-1976.9	-1565.1	-1676
F11	3	-3796	-2114.2	-1605.4	-1597.6
F12	3	-3034.8	-1641.8	-1295.7	-1310.9
G1	3	9639.5	6023.1	15207.3	33076.6
G2	3	15063.5	9409.2	16656.4	32217
G3	3	7299.5	4491.6	15025	33865.6
G4	3	11033.9	6729.2	15996.7	33711.8
G5	3	16003.3	9922	16901.7	32137
G6	3	7140.2	4355	14634	32989.3
G7	3	-3437.6	-1947.3	-1307.7	-1200
G8	3	-1684.3	-833.199	-600	-704.398
G9	3	-3463.5	-1966	-1513.4	-1571.9
G10	3	-3577.5	-2046.4	-1649.4	-1730.4
G11	3	-3512.3	-1939.3	-1451.4	-1381.6
G12	3	-2638.6	-1326.5	-974.102	-923.301
H1	3	3623.2	2452.1	13473.8	33071.8
H2	3	8951.1	5694.8	14495.9	31542.8
H3	3	-98.1016	1.80078	12038.6	32152.5
H4	3	3676.5	2441.6	13392.9	32562.4
H5	3	10547.6	6858.2	16065.4	33535.9
H6	3	160.898	149.102	11985.6	31557.3
H7	3	-3811.8	-2131	-1733.4	-2044.7
H8	3	-4107.9	-2333	-1905.5	-2180.7
H9	3	-1395.4	-566	-364.199	-599.602
H10	3	-4111.6	-2372.2	-1993	-2242
H11	3	-2457.8	-1336.8	-1142.7	-1361.2
H12	3	-2766.2	-1393.1	-1075.7	-1110.8
A1	4	10529.9	6647.1	15495.6	32912.6
A2	4	16327.5	9875.4	17308.8	33339.1
A3	4	5778.2	3545.1	11826.8	27045.1
A4	4	10516.6	6533.9	14640.7	30281
A5	4	15716.3	9852.1	16614	31514.7
A6	4	7051.8	4322.1	13689.3	30714.3
A7	4	-3941.2	-2277.9	-1836.5	-2259.3
A8	4	-3373.7	-1858.8	-1414.6	-1521.8
A9	4	-2540.6	-1313.2	-972.398	-1095.4
A10	4	-4061.3	-2359.2	-2026	-2227.6
A11	4	-3622.4	-2122.1	-1740.6	-1964.7
A12	4	-3685	-2094.9	-1862.2	-1963.2
B1	4	10507.9	6524.5	15427.3	32636.6
B2	4	18407.8	11371.1	18164.9	33469.7
B3	4	7548	4442.7	13632.2	30384.7
B4	4	9867.6	5939.5	13947.8	29189
B5	4	19240.3	11724.3	18800.5	34807
B6	4	4707.4	2868.5	11256.5	26284.9
B7	4	-2670.2	-1386.9	-951.801	-1046.6
B8	4	-2559.1	-1407.1	-1022	-1148.6
B9	4	-3584.3	-2025.8	-1532	-1678.2
B10	4	-3041.5	-1735.1	-1345.1	-1566
B11	4	-3597.6	-1999.7	-1433.6	-1575.6
B12	4	-3579.2	-2041.4	-1627.6	-1697.9
C1	4	11100.3	6690	15547.4	32962.5
C2	4	16383.4	9886.6	16752.3	31797.1
C3	4	7259.2	4101.8	13190.7	29606.5
C4	4	11980.9	7198.4	15948.4	33127.8
C5	4	14492.5	8851.5	15513.1	29833.1
C6	4	7725.3	4523.8	14197.6	31885.1
C7	4	-4872.8	-2500.6	-1713.9	-1648.7
C8	4	-3241.7	-1829	-1375.9	-1552.9
C9	4	-2538.1	-1419.6	-1043.1	-1181.9
C10	4	-3988.6	-2358	-1921.1	-2080.4
C11	4	-4052.7	-2354	-1845.6	-2038.4
C12	4	-3644	-2079.9	-1754.3	-1966.8
D1	4	3631.8	2445.5	12621.3	30389.5
D2	4	10361.8	6430.8	15505.6	32780.3
D3	4	30.8008	-40.5	12272.9	32472.8
D4	4	4342.2	2838.7	13556	32104.4
D5	4	10590.4	6634.3	16208.2	34363.8
D6	4	993.5	672.801	11533.2	29369.7
D7	4	-2796.9	-1567.6	-1159	-1230
D8	4	-3322.1	-1885.6	-1459.1	-1633.5
D9	4	-3125.6	-1785.9	-1402.2	-1576.9
D10	4	-3238.5	-1764.5	-1301.8	-1420.8
D11	4	-2775.6	-1555.9	-1205.1	-1373
D12	4	-3051.5	-1727.8	-1362.9	-1489.3
E1	4	10240	6310.5	15036.4	31952.5
E2	4	16952.5	10278.5	17142	32197
E3	4	6102.6	3632.3	13702.5	31735.8
E4	4	10515.1	6516	15317.8	32056.2
E5	4	18981.8	11609.9	18783.2	34891.8
E6	4	6818.5	4124.1	13436.4	30143.9
E7	4	-2247.6	-1146.7	-740.602	-831.5
E8	4	-2340.4	-1277.8	-937.699	-1118.1
E9	4	-2317.6	-1360.7	-1070.9	-1247
E10	4	-3593	-2059.5	-1626.8	-1663.8
E11	4	-2595.2	-1414.3	-1096.5	-1259.7
E12	4	-2883.8	-1590.5	-1274.5	-1458.9
F1	4	8922.4	5585.8	14882.9	32425.8
F2	4	16673	10234.9	17423.6	33192.5
F3	4	6333.2	3729.9	13868.9	31991.9
F4	4	10946.9	6721.3	15719.1	32843.1
F5	4	17058.7	10902	17962.7	33281.9
F6	4	6215.4	3768.5	12785.3	28923.3
F7	4	-3355.7	-1923.8	-1536.4	-1676.4
F8	4	-1952.7	-1113.2	-925.102	-1159.6
F9	4	-3198.4	-1816.4	-1434.1	-1564.4
F10	4	-3412.6	-1998.9	-1571.1	-1685
F11	4	-3819	-2135.2	-1635.4	-1628.6
F12	4	-3050.8	-1685.8	-1290.7	-1318.9
G1	4	10027.5	6243.1	15338.3	33199.6
G2	4	15294.5	9525.2	16731.4	32249
G3	4	7526.5	4591.6	15052	33816.6
G4	4	11317.9	6895.2	16147.7	33876.8
G5	4	16178.3	10023	16934.7	32115
G6	4	7352.2	4451	14659	32928.3
G7	4	-3462.6	-1970.3	-1350.7	-1218
G8	4	-1696.3	-854.199	-626	-715.398
G9	4	-3494.5	-2006	-1528.4	-1585.9
G10	4	-3600.5	-2102.4	-1656.4	-1746.4
G11	4	-3515.3	-1961.3	-1443.4	-1375.6
G12	4	-2652.6	-1355.5	-989.102	-947.301
H1	4	3709.2	2494.1	13493.8	33028.8
H2	4	9028.1	5734.8	14567.9	31581.8
H3	4	-72.1016	2.80078	12047.6	32195.5
H4	4	3743.5	2505.6	13425.9	32591.4
H5	4	10796.6	6998.2	16184.4	33647.9
H6	4	242.898	208.102	12013.6	31578.3
H7	4	-3838.8	-2135	-1746.4	-2061.7
H8	4	-4131.9	-2376	-1946.5	-2191.7
H9	4	-1423.4	-584	-387.199	-619.602
H10	4	-4120.6	-2384.2	-1994	-2232
H11	4	-2474.8	-1355.8	-1167.7	-1367.2
H12	4	-2792.2	-1410.1	-1087.7	-1106.8
A1	5	10845.9	6802.1	15549.6	32816.6
A2	5	16763.5	10113.4	17476.8	33417.1
A3	5	6037.2	3692.1	11886.8	26985.1
A4	5	10872.6	6729.9	14725.7	30317
A5	5	16158.3	10096.1	16789	31719.7
A6	5	7294.8	4435.1	13718.3	30597.3
A7	5	-3945.2	-2294.9	-1844.5	-2260.3
A8	5	-3412.7	-1889.8	-1428.6	-1543.8
A9	5	-2546.6	-1314.2	-972.398	-1099.4
A10	5	-4057.3	-2380.2	-2050	-2256.6
A11	5	-3643.4	-2125.1	-1734.6	-1960.7
A12	5	-3707	-2097.9	-1890.2	-1948.2
B1	5	10842.9	6693.5	15498.3	32673.6
B2	5	18556.8	11437.1	18168.9	33427.7
B3	5	7818	4580.7	13739.2	30426.7
B4	5	10202.6	6106.5	14099.8	29393
B5	5	19608.3	11924.3	18987.5	35079
B6	5	4871.4	2947.5	11231.5	26164.9
B7	5	-2686.2	-1410.9	-970.801	-1065.6
B8	5	-2594.1	-1422.1	-1020	-1171.6
B9	5	-3594.3	-2030.8	-1550	-1692.2
B10	5	-3058.5	-1749.1	-1343.1	-1576
B11	5	-3617.6	-2003.7	-1454.6	-1583.6
B12	5	-3606.2	-2067.4	-1648.6	-1700.9
C1	5	11484.3	6880	15720.4	33105.5
C2	5	16422.4	9927.6	16701.3	31635.1
C3	5	7509.2	4207.8	13241.7	29612.5
C4	5	12189.9	7283.4	15962.4	33042.8
C5	5	14532.5	8846.5	15416.1	29570.1
C6	5	7995.3	4651.8	14285.6	31892.1
C7	5	-4874.8	-2515.6	-1734.9	-1673.7
C8	5	-3242.7	-1841	-1392.9	-1572.9
C9	5	-2524.1	-1419.6	-1051.1	-1178.9
C10	5	-4024.6	-2381	-1926.1	-2089.4
C11	5	-4071.7	-2373	-1867.6	-2018.4
C12	5	-3676	-2103.9	-1751.3	-1949.8
D1	5	3667.8	2445.5	12592.3	30313.5
D2	5	10353.8	6408.8	15450.6	32716.3
D3	5	8.80078	-57.5	12183.9	32309.8
D4	5	4310.2	2814.7	13522	32061.4
D5	5	10526.4	6589.3	16121.2	34201.8
D6	5	1028.5	676.801	11528.2	29366.7
D7	5	-2821.9	-1573.6	-1161	-1262
D8	5	-3336.1	-1903.6	-1475.1	-1643.5
D9	5	-3138.6	-1801.9	-1389.2	-1576.9
D10	5	-3252.5	-1780.5	-1330.8	-1436.8
D11	5	-2784.6	-1566.9	-1207.1	-1396
D12	5	-3083.5	-1755.8	-1396.9	-1499.3
E1	5	10446	6427.5	15063.4	31904.5
E2	5	17030.5	10293.5	17102	32047
E3	5	6315.6	3704.3	13733.5	31719.8
E4	5	10638.1	6584	15333.8	32018.2
E5	5	19129.8	11678.9	18792.2	34820.8
E6	5	7007.5	4213.1	13477.4	30120.9
E7	5	-2247.6	-1182.7	-778.602	-850.5
E8	5	-2348.4	-1281.8	-967.699	-1127.1
E9	5	-2313.6	-1364.7	-1066.9	-1230
E10	5	-3624	-2091.5	-1661.8	-1675.8
E11	5	-2618.2	-1448.3	-1111.5	-1275.7
E12	5	-2932.8	-1617.5	-1328.5	-1449.9
F1	5	9165.4	5699.8	14898.9	32382.8
F2	5	16818	10288.9	17426.6	33143.5
F3	5	6549.2	3840.9	13905.9	32001.9
F4	5	11210.9	6851.3	15838.1	32976.1
F5	5	17219.7	10983	18005.7	33296.9
F6	5	6405.4	3845.5	12809.3	28895.3
F7	5	-3348.7	-1946.8	-1543.4	-1670.4
F8	5	-1954.7	-1105.2	-945.102	-1164.6
F9	5	-3232.4	-1812.4	-1437.1	-1567.4
F10	5	-3435.6	-2014.9	-1591.1	-1696
F11	5	-3828	-2173.2	-1628.4	-1629.6
F12	5	-3070.8	-1697.8	-1338.7	-1331.9
G1	5	10217.5	6304.1	15369.3	33144.6
G2	5	15441.5	9605.2	16754.4	32221
G3	5	7759.5	4731.6	15134	33847.6
G4	5	11506.9	6980.2	16147.7	33828.8
G5	5	16343.3	10095	16945.7	32062
G6	5	7574.2	4566	14717	32935.3
G7	5	-3486.6	-1992.3	-1361.7	-1227
G8	5	-1717.3	-850.199	-617	-722.398
G9	5	-3508.5	-2024	-1533.4	-1604.9
G10	5	-3626.5	-2083.4	-1682.4	-1741.4
G11	5	-3549.3	-1977.3	-1481.4	-1377.6
G12	5	-2671.6	-1368.5	-996.102	-959.301
H1	5	3819.2	2550.1	13495.8	32957.8
H2	5	9056.1	5747.8	14533.9	31498.8
H3	5	-34.1016	19.8008	12098.6	32271.5
H4	5	3751.5	2468.6	13419.9	32545.4
H5	5	10863.6	7043.2	16216.4	33614.9
H6	5	242.898	177.102	11973.6	31519.3
H7	5	-3839.8	-2172	-1770.4	-2064.7
H8	5	-4148.9	-2387	-1954.5	-2202.7
H9	5	-1444.4	-615	-393.199	-618.602
H10	5	-4133.6	-2410.2	-2016	-2256
H11	5	-2496.8	-1371.8	-1173.7	-1387.2
H12	5	-2812.2	-1431.1	-1095.7	-1129.8
A1	6	11244.9	7016.1	15635.6	32824.6
A2	6	17119.5	10288.4	17553.8	33451.1
A3	6	6304.2	3824.1	11932.8	26966.1
A4	6	11105.6	6845.9	14763.7	30269
A5	6	16222.3	10101.1	16714	31405.7
A6	6	7546.8	4591.1	13785.3	30613.3
A7	6	-3985.2	-2305.9	-1855.5	-2270.3
A8	6	-3427.7	-1900.8	-1447.6	-1530.8
A9	6	-2558.6	-1336.2	-991.398	-1110.4
A10	6	-4088.3	-2391.2	-2070	-2243.6
A11	6	-3675.4	-2146.1	-1762.6	-1972.7
A12	6	-3733	-2134.9	-1906.2	-1975.2
B1	6	11090.9	6834.5	15586.3	32678.6
B2	6	18715.8	11514.1	18157.9	33320.7
B3	6	8085	4731.7	13791.2	30490.7
B4	6	10410.6	6216.5	14131.8	29357
B5	6	19541.3	11847.3	18752.5	34583
B6	6	4952.4	2971.5	11140.5	25946.9
B7	6	-2665.2	-1410.9	-950.801	-1072.6
B8	6	-2612.1	-1439.1	-1051	-1167.6
B9	6	-3608.3	-2052.8	-1575	-1696.2
B10	6	-3077.5	-1773.1	-1359.1	-1598
B11	6	-3618.6	-1995.7	-1440.6	-1583.6
B12	6	-3622.2	-2084.4	-1653.6	-1726.9
C1	6	11665.3	7000	15710.4	32978.5
C2	6	16749.4	10072.6	16821.3	31764.1
C3	6	7644.2	4265.8	13155.7	29371.5
C4	6	12464.9	7405.4	16038.4	33124.8
C5	6	14927.5	9049.5	15639.1	29964.1
C6	6	8225.3	4789.8	14271.6	31832.1
C7	6	-4915.8	-2532.6	-1751.9	-1694.7
C8	6	-3271.7	-1860	-1416.9	-1575.9
C9	6	-2528.1	-1435.6	-1058.1	-1208.9
C10	6	-4022.6	-2382	-1932.1	-2106.4
C11	6	-4102.7	-2404	-1883.6	-2038.4
C12	6	-3668	-2095.9	-1774.3	-1984.8
D1	6	3623.8	2428.5	12508.3	30080.5
D2	6	10396.8	6446.8	15488.6	32749.3
D3	6	4.80078	-66.5	12140.9	32243.8
D4	6	4322.2	2787.7	13500	32012.4
D5	6	10626.4	6608.3	16197.2	34349.8
D6	6	1015.5	678.801	11475.2	29267.7
D7	6	-2850.9	-1603.6	-1175	-1249
D8	6	-3346.1	-1894.6	-1478.1	-1659.5
D9	6	-3164.6	-1807.9	-1412.2	-1582.9
D10	6	-3244.5	-1784.5	-1322.8	-1432.8
D11	6	-2811.6	-1587.9	-1228.1	-1393
D12	6	-3085.5	-1756.8	-1406.9	-1506.3
E1	6	10605	6481.5	15062.4	31804.5
E2	6	17156.5	10355.5	17097	32009
E3	6	6443.6	3801.3	13727.5	31603.8
E4	6	10820.1	6653	15368.8	31982.2
E5	6	19367.8	11778.9	18852.2	34912.8
E6	6	7209.5	4317.1	13519.4	30127.9
E7	6	-2297.6	-1194.7	-772.602	-837.5
E8	6	-2358.4	-1294.8	-986.699	-1131.1
E9	6	-2340.6	-1364.7	-1082.9	-1257
E10	6	-3622	-2091.5	-1652.8	-1679.8
E11	6	-2649.2	-1459.3	-1119.5	-1282.7
E12	6	-2916.8	-1620.5	-1330.5	-1463.9
F1	6	9323.4	5798.8	14906.9	32319.8
F2	6	16977	10373.9	17466.6	33143.5
F3	6	6700.2	3912.9	13935.9	31970.9
F4	6	11381.9	6922.3	15827.1	32882.1
F5	6	17276.7	11007	17966.7	33132.9
F6	6	6579.4	3946.5	12864.3	28913.3
F7	6	-3367.7	-1956.8	-1565.4	-1690.4
F8	6	-1954.7	-1114.2	-934.102	-1159.6
F9	6	-3221.4	-1818.4	-1447.1	-1554.4
F10	6	-3457.6	-2009.9	-1606.1	-1683
F11	6	-3856	-2188.2	-1682.4	-1682.6
F12	6	-3100.8	-1725.8	-1348.7	-1360.9
G1	6	10360.5	6399.1	15382.3	33069.6
G2	6	15627.5	9693.2	16808.4	32258
G3	6	7946.5	4815.6	15128	33791.6
G4	6	11668.9	7067.2	16193.7	33823.8
G5	6	16539.3	10199	17024.7	32160
G6	6	7713.2	4637	14692	32813.3
G7	6	-3498.6	-2014.3	-1365.7	-1245
G8	6	-1730.3	-879.199	-650	-727.398
G9	6	-3522.5	-2027	-1553.4	-1617.9
G10	6	-3633.5	-2102.4	-1674.4	-1748.4
G11	6	-3551.3	-1973.3	-1469.4	-1386.6
G12	6	-2677.6	-1374.5	-995.102	-961.301
H1	6	3873.2	2595.1	13498.8	32892.8
H2	6	9040.1	5720.8	14450.9	31342.8
H3	6	-46.1016	-7.19922	12077.6	32230.5
H4	6	3734.5	2483.6	13370.9	32468.4
H5	6	10853.6	7045.2	16182.4	33595.9
H6	6	264.898	200.102	11966.6	31470.3
H7	6	-3863.8	-2165	-1767.4	-2082.7
H8	6	-4164.9	-2383	-1974.5	-2215.7
H9	6	-1447.4	-625	-412.199	-618.602
H10	6	-4140.6	-2396.2	-2024	-2249
H11	6	-2501.8	-1363.8	-1172.7	-1387.2
H12	6	-2816.2	-1434.1	-1103.7	-1144.8
A1	7	11480.9	7135.1	15624.6	32639.6
A2	7	17402.5	10413.4	17593.8	33409.1
A3	7	6533.2	3942.1	11983.8	26936.1
A4	7	11285.6	6928.9	14782.7	30164
A5	7	16545.3	10275.1	16844	31612.7
A6	7	7792.8	4685.1	13811.3	30574.3
A7	7	-3980.2	-2346.9	-1856.5	-2287.3
A8	7	-3445.7	-1915.8	-1449.6	-1547.8
A9	7	-2583.6	-1352.2	-1009.4	-1140.4
A10	7	-4086.3	-2390.2	-2070	-2251.6
A11	7	-3681.4	-2171.1	-1780.6	-1989.7
A12	7	-3746	-2131.9	-1916.2	-1970.2
B1	7	11342.9	6937.5	15654.3	32700.6
B2	7	18879.8	11581.1	18159.9	33275.7
B3	7	8271	4820.7	13816.2	30409.7
B4	7	10695.6	6341.5	14254.8	29468
B5	7	20009.3	12100.3	19034.5	35034
B6	7	5106.4	3048.5	11138.5	25832.9
B7	7	-2694.2	-1426.9	-966.801	-1087.6
B8	7	-2619.1	-1468.1	-1032	-1184.6
B9	7	-3634.3	-2077.8	-1561	-1701.2
B10	7	-3105.5	-1798.1	-1386.1	-1617
B11	7	-3626.6	-2026.7	-1474.6	-1592.6
B12	7	-3631.2	-2093.4	-1657.6	-1732.9
C1	7	11814.3	7055	15680.4	32825.5
C2	7	16697.4	10069.6	16692.3	31471.1
C3	7	7861.2	4367.8	13243.7	29395.5
C4	7	12632.9	7500.4	16028.4	32950.8
C5	7	14785.5	8974.5	15381.1	29417.1
C6	7	8443.3	4867.8	14319.6	31773.1
C7	7	-4913.8	-2544.6	-1752.9	-1675.7
C8	7	-3280.7	-1878	-1424.9	-1599.9
C9	7	-2545.1	-1439.6	-1061.1	-1188.9
C10	7	-4050.6	-2407	-1942.1	-2142.4
C11	7	-4108.7	-2383	-1894.6	-2064.4
C12	7	-3678	-2126.9	-1805.3	-1984.8
D1	7	3610.8	2408.5	12440.3	29958.5
D2	7	10373.8	6403.8	15436.6	32649.3
D3	7	41.8008	-72.5	12199.9	32315.8
D4	7	4291.2	2770.7	13433	31888.4
D5	7	10524.4	6557.3	16089.2	34180.8
D6	7	1045.5	686.801	11509.2	29283.7
D7	7	-2872.9	-1601.6	-1192	-1278
D8	7	-3357.1	-1924.6	-1483.1	-1670.5
D9	7	-3171.6	-1818.9	-1397.2	-1603.9
D10	7	-3283.5	-1814.5	-1327.8	-1442.8
D11	7	-2817.6	-1578.9	-1236.1	-1393
D12	7	-3093.5	-1770.8	-1421.9	-1527.3
E1	7	10744	6541.5	15061.4	31700.5
E2	7	17284.5	10395.5	17110	31970
E3	7	6667.6	3901.3	13787.5	31672.8
E4	7	10956.1	6725	15366.8	31930.2
E5	7	19415.8	11800.9	18799.2	34747.8
E6	7	7375.5	4379.1	13547.4	30122.9
E7	7	-2297.6	-1206.7	-791.602	-882.5
E8	7	-2368.4	-1298.8	-982.699	-1152.1
E9	7	-2327.6	-1373.7	-1093.9	-1281
E10	7	-3638	-2103.5	-1661.8	-1705.8
E11	7	-2636.2	-1472.3	-1129.5	-1283.7
E12	7	-2916.8	-1616.5	-1328.5	-1459.9
F1	7	9482.4	5864.8	14913.9	32280.8
F2	7	17096	10392.9	17452.6	33059.5
F3	7	6857.2	3989.9	13929.9	31856.9
F4	7	11588.9	7046.3	15938.1	32987.1
F5	7	17446.7	11071	18015.7	33214.9
F6	7	6726.4	4016.5	12857.3	28831.3
F7	7	-3378.7	-1960.8	-1545.4	-1686.4
F8	7	-1978.7	-1142.2	-953.102	-1180.6
F9	7	-3240.4	-1835.4	-1449.1	-1585.4
F10	7	-3466.6	-2033.9	-1604.1	-1713
F11	7	-3852	-2189.2	-1676.4	-1669.6
F12	7	-3098.8	-1712.8	-1327.7	-1358.9
G1	7	10489.5	6431.1	15388.3	32986.6
G2	7	15685.5	9719.2	16766.4	32122
G3	7	8106.5	4866.6	15142	33728.6
G4	7	11854.9	7139.2	16207.7	33754.8
G5	7	16668.3	10244	17051.7	32109
G6	7	7878.2	4710	14711	32792.3
G7	7	-3502.6	-2010.3	-1381.7	-1246
G8	7	-1729.3	-882.199	-652	-719.398
G9	7	-3560.5	-2042	-1564.4	-1628.9
G10	7	-3652.5	-2116.4	-1678.4	-1772.4
G11	7	-3581.3	-1997.3	-1499.4	-1399.6
G12	7	-2697.6	-1393.5	-1007.1	-968.301
H1	7	3954.2	2620.1	13497.8	32846.8
H2	7	9056.1	5698.8	14411.9	31262.8
H3	7	-77.1016	-0.199219	12051.6	32119.5
H4	7	3732.5	2454.6	13341.9	32359.4
H5	7	10847.6	7033.2	16173.4	33559.9
H6	7	247.898	212.102	11957.6	31404.3
H7	7	-3879.8	-2181	-1786.4	-2079.7
H8	7	-4168.9	-2393	-1993.5	-2226.7
H9	7	-1465.4	-630	-426.199	-639.602
H10	7	-4159.6	-2421.2	-2035	-2266
H11	7	-2500.8	-1389.8	-1183.7	-1408.2
H12	7	-2833.2	-1449.1	-1122.7	-1143.8
A1	8	11851.9	7329.1	15750.6	32675.6
A2	8	17617.5	10515.4	17660.8	33386.1
A3	8	6715.2	4023.1	12008.8	26913.1
A4	8	11489.6	7038.9	14815.7	30148
A5	8	16698.3	10343.1	16833	31532.7
A6	8	8023.8	4819.1	13866.3	30550.3
A7	8	-3958.2	-2315.9	-1861.5	-2282.3
A8	8	-3456.7	-1920.8	-1449.6	-1557.8
A9	8	-2577.6	-1338.2	-983.398	-1143.4
A10	8	-4091.3	-2389.2	-2065	-2267.6
A11	8	-3668.4	-2151.1	-1772.6	-1975.7
A12	8	-3749	-2144.9	-1922.2	-1988.2
B1	8	11554.9	7049.5	15659.3	32641.6
B2	8	19053.8	11673.1	18234.9	33288.7
B3	8	8477	4930.7	13838.2	30327.7
B4	8	10921.6	6490.5	14312.8	29503
B5	8	20042.3	12115.3	18932.5	34774
B6	8	5239.4	3139.5	11153.5	25760.9
B7	8	-2700.2	-1428.9	-977.801	-1080.6
B8	8	-2630.1	-1455.1	-1055	-1177.6
B9	8	-3610.3	-2060.8	-1583	-1699.2
B10	8	-3131.5	-1818.1	-1408.1	-1634
B11	8	-3639.6	-2020.7	-1455.6	-1599.6
B12	8	-3623.2	-2092.4	-1669.6	-1745.9
C1	8	12138.3	7224	15838.4	33040.5
C2	8	17039.4	10221.6	16799.3	31605.1
C3	8	8122.2	4529.8	13320.7	29450.5
C4	8	12887.9	7633.4	16108.4	33014.8
C5	8	15212.5	9212.5	15651.1	29780.1
C6	8	8684.3	5007.8	14379.6	31791.1
C7	8	-4918.8	-2530.6	-1749.9	-1695.7
C8	8	-3281.7	-1869	-1416.9	-1597.9
C9	8	-2568.1	-1456.6	-1059.1	-1218.9
C10	8	-4058.6	-2417	-1960.1	-2130.4
C11	8	-4128.7	-2406	-1901.6	-2054.4
C12	8	-3688	-2124.9	-1796.3	-1990.8
D1	8	3659.8	2424.5	12500.3	30040.5
D2	8	10377.8	6402.8	15410.6	32604.3
D3	8	48.8008	-62.5	12163.9	32254.8
D4	8	4313.2	2790.7	13469	31883.4
D5	8	10447.4	6483.3	15982.2	33951.8
D6	8	1043.5	684.801	11460.2	29191.7
D7	8	-2876.9	-1611.6	-1190	-1274
D8	8	-3368.1	-1923.6	-1504.1	-1671.5
D9	8	-3168.6	-1842.9	-1432.2	-1593.9
D10	8	-3274.5	-1799.5	-1347.8	-1447.8
D11	8	-2824.6	-1604.9	-1249.1	-1406
D12	8	-3100.5	-1766.8	-1418.9	-1514.3
E1	8	10843	6587.5	15037.4	31621.5
E2	8	17404.5	10472.5	17124	31896
E3	8	6854.6	3969.3	13811.5	31667.8
E4	8	11162.1	6823	15436.8	32038.2
E5	8	19473.8	11799.9	18778.2	34630.8
E6	8	7536.5	4475.1	13559.4	30095.9
E7	8	-2304.6	-1222.7	-817.602	-885.5
E8	8	-2367.4	-1343.8	-997.699	-1169.1
E9	8	-2342.6	-1384.7	-1099.9	-1274
E10	8	-3618	-2103.5	-1663.8	-1696.8
E11	8	-2642.2	-1495.3	-1151.5	-1304.7
E12	8	-2946.8	-1631.5	-1350.5	-1466.9
F1	8	9606.4	5926.8	14913.9	32180.8
F2	8	17162	10441.9	17396.6	32934.5
F3	8	7035.2	4048.9	13962.9	31849.9
F4	8	11792.9	7159.3	16004.1	33047.1
F5	8	17600.7	11136	18112.7	33287.9
F6	8	6874.4	4109.5	12904.3	28844.3
F7	8	-3398.7	-1978.8	-1572.4	-1696.4
F8	8	-1986.7	-1128.2	-954.102	-1187.6
F9	8	-3225.4	-1847.4	-1468.1	-1589.4
F10	8	-3483.6	-2032.9	-1617.1	-1730
F11	8	-3877	-2193.2	-1690.4	-1713.6
F12	8	-3089.8	-1735.8	-1346.7	-1359.9
G1	8	10677.5	6526.1	15425.3	33030.6
G2	8	15743.5	9737.2	16722.4	32025
G3	8	8262.5	4951.6	15172	33666.6
G4	8	12008.9	7209.2	16236.7	33739.8
G5	8	16807.3	10324	17069.7	32096
G6	8	8061.2	4797	14726	32709.3
G7	8	-3536.6	-2015.3	-1393.7	-1243
G8	8	-1751.3	-895.199	-664	-729.398
G9	8	-3563.5	-2064	-1586.4	-1652.9
G10	8	-3653.5	-2103.4	-1697.4	-1762.4
G11	8	-3564.3	-1971.3	-1509.4	-1404.6
G12	8	-2719.6	-1403.5	-1015.1	-958.301
H1	8	4010.2	2653.1	13502.8	32787.8
H2	8	9038.1	5666.8	14391.9	31199.8
H3	8	-81.1016	-3.19922	12015.6	32092.5
H4	8	3721.5	2438.6	13308.9	32336.4
H5	8	10851.6	7042.2	16151.4	33500.9
H6	8	286.898	208.102	11949.6	31439.3
H7	8	-3870.8	-2190	-1772.4	-2086.7
H8	8	-4172.9	-2398	-1974.5	-2227.7
H9	8	-1460.4	-637	-443.199	-648.602
H10	8	-4155.6	-2420.2	-2032	-2279
H11	8	-2530.8	-1412.8	-1197.7	-1413.2
H12	8	-2823.2	-1456.1	-1127.7	-1144.8
A1	9	12085.9	7453.1	15742.6	32525.6
A2	9	17789.5	10603.4	17667.8	33338.1
A3	9	6878.2	4097.1	12031.8	26824.1
A4	9	11681.6	7126.9	14851.7	30108
A5	9	16824.3	10405.1	16839	31442.7
A6	9	8244.8	4915.1	13927.3	30595.3
A7	9	-4011.2	-2326.9	-1885.5	-2287.3
A8	9	-3428.7	-1901.8	-1458.6	-1554.8
A9	9	-2569.6	-1350.2	-1022.4	-1149.4
A10	9	-4111.3	-2402.2	-2085	-2252.6
A11	9	-3698.4	-2182.1	-1784.6	-2012.7
A12	9	-3762	-2160.9	-1924.2	-1989.2
B1	9	11734.9	7137.5	15717.3	32644.6
B2	9	19208.8	11739.1	18221.9	33264.7
B3	9	8700	5015.7	13920.2	30421.7
B4	9	11141.6	6596.5	14393.8	29604
B5	9	20307.3	12254.3	19046.5	34872
B6	9	5374.4	3169.5	11131.5	25670.9
B7	9	-2697.2	-1441.9	-993.801	-1092.6
B8	9	-2651.1	-1482.1	-1079	-1212.6
B9	9	-3653.3	-2091.8	-1588	-1723.2
B10	9	-3149.5	-1817.1	-1416.1	-1626
B11	9	-3665.6	-2049.7	-1480.6	-1601.6
B12	9	-3649.2	-2119.4	-1687.6	-1736.9
C1	9	12218.3	7228	15755.4	32800.5
C2	9	17021.4	10205.6	16715.3	31391.1
C3	9	8345.2	4624.8	13407.7	29534.5
C4	9	13037.9	7705.4	16081.4	32891.8
C5	9	15211.5	9168.5	15515.1	29528.1
C6	9	8890.3	5114.8	14408.6	31761.1
C7	9	-4916.8	-2550.6	-1761.9	-1704.7
C8	9	-3298.7	-1904	-1443.9	-1604.9
C9	9	-2543.1	-1442.6	-1068.1	-1213.9
C10	9	-4064.6	-2436	-1977.1	-2145.4
C11	9	-4159.7	-2438	-1894.6	-2059.4
C12	9	-3712	-2151.9	-1792.3	-1999.8
D1	9	3594.8	2377.5	12423.3	29863.5
D2	9	10345.8	6378.8	15393.6	32567.3
D3	9	20.8008	-68.5	12072.9	32046.8
D4	9	4268.2	2752.7	13380	31798.4
D5	9	10552.4	6540.3	16094.2	34193.8
D6	9	1066.5	687.801	11448.2	29172.7
D7	9	-2878.9	-1617.6	-1200	-1284
D8	9	-3372.1	-1925.6	-1521.1	-1690.5
D9	9	-3154.6	-1820.9	-1422.2	-1585.9
D10	9	-3291.5	-1830.5	-1351.8	-1462.8
D11	9	-2843.6	-1618.9	-1271.1	-1443
D12	9	-3098.5	-1788.8	-1424.9	-1534.3
E1	9	10953	6608.5	14988.4	31480.5
E2	9	17460.5	10470.5	17079	31817
E3	9	6973.6	4050.3	13816.5	31589.8
E4	9	11230.1	6859	15410.8	31926.2
E5	9	19684.8	11939.9	18860.2	34758.8
E6	9	7660.5	4552.1	13596.4	30088.9
E7	9	-2311.6	-1231.7	-813.602	-874.5
E8	9	-2384.4	-1334.8	-1007.7	-1167.1
E9	9	-2352.6	-1401.7	-1099.9	-1284
E10	9	-3637	-2117.5	-1697.8	-1719.8
E11	9	-2684.2	-1505.3	-1163.5	-1301.7
E12	9	-2943.8	-1644.5	-1348.5	-1466.9
F1	9	9704.4	5949.8	14895.9	32102.8
F2	9	17269	10468.9	17410.6	32881.5
F3	9	7131.2	4123.9	13953.9	31769.9
F4	9	11936.9	7202.3	16030.1	33068.1
F5	9	17608.7	11166	18021.7	33126.9
F6	9	7035.4	4177.5	12930.3	28843.3
F7	9	-3362.7	-1974.8	-1572.4	-1711.4
F8	9	-1971.7	-1157.2	-958.102	-1192.6
F9	9	-3247.4	-1856.4	-1473.1	-1592.4
F10	9	-3474.6	-2046.9	-1634.1	-1734
F11	9	-3885	-2224.2	-1729.4	-1728.6
F12	9	-3132.8	-1733.8	-1375.7	-1399.9
G1	9	10785.5	6597.1	15449.3	33014.6
G2	9	15907.5	9796.2	16782.4	32071
G3	9	8454.5	5059.6	15239	33734.6
G4	9	12118.9	7249.2	16198.7	33623.8
G5	9	16935.3	10370	17093.7	32104
G6	9	8203.2	4859	14734	32676.3
G7	9	-3535.6	-2028.3	-1390.7	-1262
G8	9	-1754.3	-882.199	-647	-738.398
G9	9	-3553.5	-2071	-1583.4	-1644.9
G10	9	-3666.5	-2128.4	-1715.4	-1795.4
G11	9	-3567.3	-1987.3	-1501.4	-1409.6
G12	9	-2719.6	-1414.5	-1027.1	-994.301
H1	9	4030.2	2661.1	13452.8	32673.8
H2	9	8978.1	5665.8	14353.9	31104.8
H3	9	-66.1016	-42.1992	12021.6	32161.5
H4	9	3708.5	2410.6	13271.9	32231.4
H5	9	10809.6	6972.2	16089.4	33420.9
H6	9	275.898	190.102	11909.6	31332.3
H7	9	-3872.8	-2216	-1802.4	-2100.7
H8	9	-4188.9	-2416	-2003.5	-2243.7
H9	9	-1469.4	-654	-452.199	-667.602
H10	9	-4206.6	-2442.2	-2059	-2285
H11	9	-2525.8	-1424.8	-1210.7	-1423.2
H12	9	-2852.2	-1445.1	-1123.7	-1158.8
A1	10	12455.9	7637.1	15872.6	32600.6
A2	10	17889.5	10668.4	17656.8	33261.1
A3	10	7064.2	4193.1	12050.8	26821.1
A4	10	11835.6	7171.9	14861.7	30099
A5	10	17069.3	10535.1	16953	31578.7
A6	10	8450.8	5023.1	13947.3	30569.3
A7	10	-4005.2	-2330.9	-1897.5	-2300.3
A8	10	-3444.7	-1921.8	-1477.6	-1570.8
A9	10	-2604.6	-1363.2	-1025.4	-1142.4
A10	10	-4114.3	-2389.2	-2062	-2263.6
A11	10	-3695.4	-2161.1	-1778.6	-2021.7
A12	10	-3767	-2159.9	-1932.2	-1985.2
B1	10	11853.9	7191.5	15690.3	32517.6
B2	10	19279.8	11796.1	18179.9	33078.7
B3	10	8872	5106.7	13927.2	30357.7
B4	10	11188.6	6609.5	14270.8	29311
B5	10	20540.3	12366.3	19135.5	34978
B6	10	5483.4	3230.5	11100.5	25535.9
B7	10	-2711.2	-1416.9	-995.801	-1102.6
B8	10	-2639.1	-1482.1	-1058	-1212.6
B9	10	-3658.3	-2097.8	-1571	-1723.2
B10	10	-3142.5	-1818.1	-1401.1	-1633
B11	10	-3688.6	-2046.7	-1513.6	-1624.6
B12	10	-3655.2	-2091.4	-1676.6	-1726.9
C1	10	12485.3	7389	15877.4	32930.5
C2	10	17166.4	10252.6	16737.3	31366.1
C3	10	8481.2	4708.8	13371.7	29406.5
C4	10	13302.9	7853.4	16215.4	33105.8
C5	10	15202.5	9133.5	15392.1	29205.1
C6	10	9072.3	5189.8	14412.6	31669.1
C7	10	-4926.8	-2556.6	-1792.9	-1703.7
C8	10	-3294.7	-1890	-1455.9	-1588.9
C9	10	-2567.1	-1460.6	-1087.1	-1208.9
C10	10	-4062.6	-2443	-1969.1	-2142.4
C11	10	-4139.7	-2406	-1909.6	-2059.4
C12	10	-3695	-2146.9	-1804.3	-1980.8
D1	10	3590.8	2379.5	12379.3	29812.5
D2	10	10323.8	6379.8	15362.6	32504.3
D3	10	54.8008	-75.5	12083.9	32031.8
D4	10	4329.2	2795.7	13444	31909.4
D5	10	10433.4	6471.3	15957.2	33955.8
D6	10	1085.5	689.801	11412.2	29066.7
D7	10	-2883.9	-1619.6	-1238	-1293
D8	10	-3386.1	-1942.6	-1530.1	-1684.5
D9	10	-3187.6	-1821.9	-1433.2	-1607.9
D10	10	-3290.5	-1816.5	-1348.8	-1471.8
D11	10	-2835.6	-1606.9	-1267.1	-1399
D12	10	-3086.5	-1788.8	-1405.9	-1528.3
E1	10	11084	6686.5	15037.4	31482.5
E2	10	17557.5	10540.5	17094	31806
E3	10	7129.6	4140.3	13855.5	31611.8
E4	10	11402.1	6921	15456.8	31940.2
E5	10	19699.8	11946.9	18787.2	34605.8
E6	10	7788.5	4591.1	13582.4	29975.9
E7	10	-2294.6	-1222.7	-826.602	-881.5
E8	10	-2394.4	-1336.8	-1006.7	-1161.1
E9	10	-2361.6	-1396.7	-1105.9	-1280
E10	10	-3643	-2112.5	-1679.8	-1717.8
E11	10	-2657.2	-1498.3	-1147.5	-1315.7
E12	10	-2987.8	-1660.5	-1366.5	-1503.9
F1	10	9856.4	6016.8	14924.9	32073.8
F2	10	17370	10527.9	17429.6	32899.5
F3	10	7298.2	4204.9	13958.9	31713.9
F4	10	11980.9	7236.3	15949.1	32851.1
F5	10	17688.7	11164	18025.7	33077.9
F6	10	7154.4	4241.5	12921.3	28781.3
F7	10	-3378.7	-1984.8	-1588.4	-1709.4
F8	10	-1988.7	-1149.2	-967.102	-1189.6
F9	10	-3243.4	-1842.4	-1482.1	-1604.4
F10	10	-3471.6	-2057.9	-1630.1	-1736
F11	10	-3858	-2213.2	-1720.4	-1727.6
F12	10	-3146.8	-1760.8	-1403.7	-1385.9
G1	10	10930.5	6668.1	15480.3	33007.6
G2	10	15960.5	9829.2	16751.4	31972
G3	10	8590.5	5131.6	15228	33654.6
G4	10	12282.9	7356.2	16256.7	33730.8
G5	10	17075.3	10441	17141.7	32140
G6	10	8344.2	4932	14727	32594.3
G7	10	-3545.6	-2054.3	-1386.7	-1283
G8	10	-1725.3	-893.199	-664	-722.398
G9	10	-3562.5	-2070	-1606.4	-1648.9
G10	10	-3653.5	-2138.4	-1712.4	-1783.4
G11	10	-3579.3	-2014.3	-1507.4	-1395.6
G12	10	-2716.6	-1406.5	-1042.1	-982.301
H1	10	4057.2	2666.1	13435.8	32532.8
H2	10	8963.1	5635.8	14302.9	31063.8
H3	10	-69.1016	-45.1992	11992.6	32077.5
H4	10	3692.5	2412.6	13258.9	32222.4
H5	10	10810.6	6986.2	16081.4	33403.9
H6	10	268.898	189.102	11896.6	31322.3
H7	10	-3909.8	-2238	-1800.4	-2097.7
H8	10	-4191.9	-2416	-2007.5	-2237.7
H9	10	-1474.4	-646	-438.199	-656.602
H10	10	-4182.6	-2436.2	-2042	-2279
H11	10	-2533.8	-1398.8	-1211.7	-1416.2
H12	10	-2842.2	-1470.1	-1127.7	-1165.8
A1	11	12676.9	7771.1	15908.6	32539.6
A2	11	18062.5	10748.4	17686.8	33211.1
A3	11	7204.2	4278.1	12066.8	26757.1
A4	11	12008.6	7277.9	14879.7	30034
A5	11	17170.3	10585.1	16914	31470.7
A6	11	8650.8	5128.1	14019.3	30601.3
A7	11	-4005.2	-2353.9	-1889.5	-2311.3
A8	11	-3459.7	-1945.8	-1469.6	-1573.8
A9	11	-2599.6	-1377.2	-1024.4	-1142.4
A10	11	-4107.3	-2408.2	-2086	-2261.6
A11	11	-3715.4	-2198.1	-1797.6	-1996.7
A12	11	-3772	-2156.9	-1920.2	-2009.2
B1	11	12029.9	7273.5	15710.3	32463.6
B2	11	19516.8	11912.1	18311.9	33259.7
B3	11	9070	5212.7	13988.2	30340.7
B4	11	11444.6	6723.5	14379.8	29467
B5	11	20581.3	12382.3	19056.5	34767
B6	11	5609.4	3294.5	11082.5	25444.9
B7	11	-2700.2	-1433.9	-999.801	-1096.6
B8	11	-2625.1	-1469.1	-1059	-1195.6
B9	11	-3638.3	-2097.8	-1601	-1727.2
B10	11	-3170.5	-1829.1	-1433.1	-1663
B11	11	-3686.6	-2064.7	-1500.6	-1619.6
B12	11	-3641.2	-2114.4	-1692.6	-1749.9
C1	11	12708.3	7481	15963.4	33016.5
C2	11	17276.4	10326.6	16755.3	31309.1
C3	11	8665.2	4770.8	13383.7	29341.5
C4	11	13470.9	7908.4	16209.4	33004.8
C5	11	15542.5	9330.5	15604.1	29556.1
C6	11	9263.3	5297.8	14458.6	31679.1
C7	11	-4939.8	-2554.6	-1781.9	-1721.7
C8	11	-3307.7	-1883	-1457.9	-1620.9
C9	11	-2559.1	-1461.6	-1093.1	-1240.9
C10	11	-4067.6	-2438	-1978.1	-2122.4
C11	11	-4156.7	-2427	-1919.6	-2058.4
C12	11	-3705	-2150.9	-1794.3	-2011.8
D1	11	3617.8	2385.5	12398.3	29807.5
D2	11	10302.8	6356.8	15318.6	32451.3
D3	11	41.8008	-80.5	12069.9	32022.8
D4	11	4314.2	2776.7	13383	31848.4
D5	11	10373.4	6414.3	15884.2	33780.8
D6	11	1057.5	687.801	11428.2	29106.7
D7	11	-2881.9	-1643.6	-1218	-1291
D8	11	-3367.1	-1940.6	-1526.1	-1669.5
D9	11	-3162.6	-1827.9	-1426.2	-1614.9
D10	11	-3293.5	-1800.5	-1358.8	-1483.8
D11	11	-2823.6	-1610.9	-1260.1	-1426
D12	11	-3097.5	-1788.8	-1418.9	-1541.3
E1	11	11169	6756.5	15030.4	31384.5
E2	11	17621.5	10561.5	17070	31722
E3	11	7227.6	4186.3	13848.5	31495.8
E4	11	11536.1	7010	15496.8	31970.2
E5	11	19792.8	11955.9	18785.2	34556.8
E6	11	7967.5	4689.1	13651.4	30006.9
E7	11	-2325.6	-1242.7	-829.602	-910.5
E8	11	-2380.4	-1346.8	-1012.7	-1168.1
E9	11	-2354.6	-1398.7	-1117.9	-1282
E10	11	-3644	-2144.5	-1698.8	-1721.8
E11	11	-2677.2	-1504.3	-1153.5	-1315.7
E12	11	-2941.8	-1663.5	-1362.5	-1481.9
F1	11	9967.4	6087.8	14946.9	32013.8
F2	11	17435	10539.9	17404.6	32787.5
F3	11	7407.2	4261.9	13971.9	31657.9
F4	11	12197.9	7352.3	16050.1	32997.1
F5	11	17781.7	11217	18019.7	33071.9
F6	11	7303.4	4305.5	12939.3	28760.3
F7	11	-3394.7	-1984.8	-1592.4	-1716.4
F8	11	-1988.7	-1156.2	-961.102	-1187.6
F9	11	-3242.4	-1861.4	-1465.1	-1608.4
F10	11	-3502.6	-2043.9	-1649.1	-1738
F11	11	-3850	-2197.2	-1726.4	-1721.6
F12	11	-3130.8	-1747.8	-1405.7	-1391.9
G1	11	11068.5	6707.1	15497.3	32990.6
G2	11	16008.5	9828.2	16694.4	31841
G3	11	8772.5	5229.6	15288	33717.6
G4	11	12399.9	7420.2	16254.7	33663.8
G5	11	17174.3	10472	17119.7	32072
G6	11	8526.2	5036	14780	32607.3
G7	11	-3553.6	-2063.3	-1403.7	-1282
G8	11	-1735.3	-905.199	-661	-755.398
G9	11	-3587.5	-2078	-1599.4	-1669.9
G10	11	-3673.5	-2132.4	-1729.4	-1810.4
G11	11	-3595.3	-2022.3	-1511.4	-1417.6
G12	11	-2720.6	-1394.5	-1035.1	-973.301
H1	11	4053.2	2653.1	13394.8	32447.8
H2	11	8962.1	5611.8	14282.9	31024.8
H3	11	-78.1016	-27.1992	12016.6	32149.5
H4	11	3676.5	2378.6	13220.9	32143.4
H5	11	10797.6	6942.2	16046.4	33330.9
H6	11	282.898	195.102	11892.6	31311.3
H7	11	-3886.8	-2214	-1810.4	-2113.7
H8	11	-4185.9	-2422	-1983.5	-2239.7
H9	11	-1471.4	-655	-450.199	-661.602
H10	11	-4162.6	-2452.2	-2058	-2281
H11	11	-2520.8	-1431.8	-1223.7	-1411.2
H12	11	-2831.2	-1452.1	-1122.7	-1169.8
A1	12	12873.9	7870.1	15933.6	32444.6
A2	12	18131.5	10751.4	17625.8	33101.1
A3	12	7386.2	4349.1	12094.8	26736.1
A4	12	12180.6	7360.9	14922.7	30006
A5	12	17222.3	10583.1	16860	31310.7
A6	12	8830.8	5207.1	13991.3	30481.3
A7	12	-4025.2	-2369.9	-1905.5	-2303.3
A8	12	-3451.7	-1940.8	-1489.6	-1597.8
A9	12	-2606.6	-1383.2	-1014.4	-1144.4
A10	12	-4113.3	-2415.2	-2093	-2275.6
A11	12	-3696.4	-2188.1	-1803.6	-2002.7
A12	12	-3766	-2166.9	-1960.2	-2009.2
B1	12	12146.9	7353.5	15731.3	32431.6
B2	12	19452.8	11885.1	18185.9	32972.7
B3	12	9286	5314.7	14008.2	30323.7
B4	12	11763.6	6875.5	14548.8	29650
B5	12	20669.3	12409.3	19021.5	34610
B6	12	5767.4	3367.5	11128.5	25414.9
B7	12	-2701.2	-1457.9	-1010.8	-1107.6
B8	12	-2627.1	-1492.1	-1063	-1208.6
B9	12	-3664.3	-2108.8	-1596	-1728.2
B10	12	-3178.5	-1855.1	-1427.1	-1660
B11	12	-3695.6	-2078.7	-1495.6	-1617.6
B12	12	-3623.2	-2091.4	-1674.6	-1768.9
C1	12	12814.3	7550	15922.4	32888.5
C2	12	17327.4	10362.6	16730.3	31238.1
C3	12	8867.2	4875.8	13447.7	29374.5
C4	12	13609.9	7964.4	16186.4	32875.8
C5	12	15625.5	9388.5	15586.1	29485.1
C6	12	9462.3	5406.8	14459.6	31618.1
C7	12	-4914.8	-2571.6	-1781.9	-1715.7
C8	12	-3289.7	-1893	-1450.9	-1619.9
C9	12	-2520.1	-1454.6	-1073.1	-1220.9
C10	12	-4057.6	-2443	-1977.1	-2152.4
C11	12	-4138.7	-2428	-1920.6	-2074.4
C12	12	-3684	-2152.9	-1827.3	-1980.8
D1	12	3567.8	2339.5	12320.3	29673.5
D2	12	10282.8	6319.8	15285.6	32380.3
D3	12	12.8008	-87.5	11987.9	31836.8
D4	12	4255.2	2722.7	13326	31640.4
D5	12	10516.4	6511.3	16040.2	34120.8
D6	12	1096.5	691.801	11384.2	28978.7
D7	12	-2889.9	-1615.6	-1215	-1290
D8	12	-3372.1	-1939.6	-1533.1	-1689.5
D9	12	-3174.6	-1832.9	-1428.2	-1629.9
D10	12	-3297.5	-1831.5	-1379.8	-1480.8
D11	12	-2844.6	-1613.9	-1276.1	-1428
D12	12	-3120.5	-1789.8	-1442.9	-1540.3
E1	12	11232	6768.5	14993.4	31262.5
E2	12	17823.5	10646.5	17152	31781
E3	12	7386.6	4244.3	13848.5	31446.8
E4	12	11560.1	6995	15403.8	31780.2
E5	12	20007.8	12060.9	18886.2	34693.8
E6	12	8068.5	4715.1	13649.4	29962.9
E7	12	-2319.6	-1239.7	-815.602	-895.5
E8	12	-2405.4	-1332.8	-1017.7	-1170.1
E9	12	-2343.6	-1413.7	-1131.9	-1286
E10	12	-3650	-2147.5	-1672.8	-1716.8
E11	12	-2688.2	-1524.3	-1170.5	-1318.7
E12	12	-2956.8	-1658.5	-1362.5	-1487.9
F1	12	10054.4	6108.8	14916.9	31958.8
F2	12	17549	10588.9	17413.6	32749.5
F3	12	7499.2	4313.9	13928.9	31529.9
F4	12	12338.9	7420.3	16103.1	33019.1
F5	12	17843.7	11237	18014.7	33007.9
F6	12	7406.4	4344.5	12934.3	28665.3
F7	12	-3403.7	-1982.8	-1597.4	-1715.4
F8	12	-1994.7	-1173.2	-996.102	-1204.6
F9	12	-3268.4	-1857.4	-1496.1	-1613.4
F10	12	-3504.6	-2063.9	-1664.1	-1729
F11	12	-3849	-2214.2	-1717.4	-1750.6
F12	12	-3124.8	-1760.8	-1386.7	-1376.9
G1	12	11137.5	6723.1	15476.3	32910.6
G2	12	16064.5	9847.2	16693.4	31777
G3	12	8914.5	5295.6	15328	33699.6
G4	12	12491.9	7445.2	16236.7	33502.8
G5	12	17297.3	10523	17146.7	32090
G6	12	8641.2	5095	14759	32515.3
G7	12	-3553.6	-2043.3	-1411.7	-1282
G8	12	-1746.3	-911.199	-670	-756.398
G9	12	-3569.5	-2072	-1604.4	-1649.9
G10	12	-3679.5	-2142.4	-1724.4	-1791.4
G11	12	-3585.3	-2016.3	-1512.4	-1404.6
G12	12	-2718.6	-1404.5	-1038.1	-997.301
H1	12	4047.2	2647.1	13337.8	32298.8
H2	12	8920.1	5602.8	14264.9	30958.8
H3	12	-75.1016	-68.1992	11982.6	32065.5
H4	12	3676.5	2404.6	13193.9	32066.4
H5	12	10735.6	6907.2	15991.4	33258.9
H6	12	273.898	162.102	11863.6	31247.3
H7	12	-3902.8	-2229	-1826.4	-2121.7
H8	12	-4203.9	-2420	-1995.5	-2240.7
H9	12	-1487.4	-672	-468.199	-661.602
H10	12	-4178.6	-2439.2	-2057	-2282
H11	12	-2518.8	-1421.8	-1216.7	-1428.2
H12	12	-2838.2	-1453.1	-1123.7	-1151.8
A1	13	13062.9	7947.1	15932.6	32350.6
A2	13	18303.5	10820.4	17657.8	33065.1
A3	13	7549.2	4433.1	12098.8	26666.1
A4	13	12319.6	7432.9	14926.7	29969
A5	13	17406.3	10686.1	16936	31385.7
A6	13	9088.8	5336.1	14104.3	30538.3
A7	13	-4017.2	-2365.9	-1895.5	-2300.3
A8	13	-3464.7	-1961.8	-1493.6	-1603.8
A9	13	-2596.6	-1395.2	-1030.4	-1150.4
A10	13	-4106.3	-2420.2	-2093	-2284.6
A11	13	-3721.4	-2191.1	-1819.6	-2036.7
A12	13	-3763	-2166.9	-1957.2	-2001.2
B1	13	12326.9	7423.5	15751.3	32402.6
B2	13	19726.8	12000.1	18270.9	33123.7
B3	13	9464	5415.7	14016.2	30300.7
B4	13	11816.6	6909.5	14495.8	29519
B5	13	20809.3	12467.3	19016.5	34597
B6	13	5838.4	3415.5	11066.5	25200.9
B7	13	-2730.2	-1453.9	-1015.8	-1136.6
B8	13	-2636.1	-1485.1	-1071	-1219.6
B9	13	-3660.3	-2102.8	-1614	-1740.2
B10	13	-3174.5	-1859.1	-1441.1	-1653
B11	13	-3697.6	-2083.7	-1515.6	-1637.6
B12	13	-3637.2	-2110.4	-1703.6	-1772.9
C1	13	12968.3	7620	15951.4	32860.5
C2	13	17650.4	10472.6	16836.3	31345.1
C3	13	9099.2	4994.8	13506.7	29423.5
C4	13	13817.9	8074.4	16276.4	32940.8
C5	13	15833.5	9467.5	15685.1	29577.1
C6	13	9664.3	5486.8	14520.6	31617.1
C7	13	-4911.8	-2570.6	-1787.9	-1733.7
C8	13	-3287.7	-1913	-1451.9	-1634.9
C9	13	-2567.1	-1467.6	-1091.1	-1231.9
C10	13	-4086.6	-2454	-2002.1	-2141.4
C11	13	-4155.7	-2448	-1923.6	-2066.4
C12	13	-3713	-2160.9	-1838.3	-2016.8
D1	13	3580.8	2351.5	12296.3	29629.5
D2	13	10251.8	6313.8	15252.6	32299.3
D3	13	32.8008	-94.5	11997.9	31858.8
D4	13	4306.2	2758.7	13349	31709.4
D5	13	10388.4	6437.3	15878.2	33778.8
D6	13	1078.5	667.801	11380.2	28947.7
D7	13	-2872.9	-1637.6	-1224	-1311
D8	13	-3386.1	-1955.6	-1532.1	-1679.5
D9	13	-3162.6	-1848.9	-1444.2	-1624.9
D10	13	-3309.5	-1826.5	-1365.8	-1470.8
D11	13	-2825.6	-1627.9	-1277.1	-1446
D12	13	-3119.5	-1795.8	-1448.9	-1546.3
E1	13	11327	6804.5	14972.4	31234.5
E2	13	17742.5	10578.5	17000	31521
E3	13	7552.6	4314.3	13901.5	31479.8
E4	13	11740.1	7106	15498.8	31870.2
E5	13	19969.8	12027.9	18771.2	34473.8
E6	13	8214.5	4799.1	13625.4	29861.9
E7	13	-2319.6	-1257.7	-819.602	-905.5
E8	13	-2378.4	-1346.8	-1006.7	-1172.1
E9	13	-2341.6	-1397.7	-1134.9	-1297
E10	13	-3654	-2139.5	-1697.8	-1717.8
E11	13	-2671.2	-1520.3	-1169.5	-1338.7
E12	13	-2945.8	-1681.5	-1358.5	-1497.9
F1	13	10162.4	6176.8	14928.9	31912.8
F2	13	17562	10575.9	17344.6	32617.5
F3	13	7698.2	4387.9	13966.9	31524.9
F4	13	12426.9	7446.3	16097.1	32941.1
F5	13	17889.7	11258	17966.7	32918.9
F6	13	7547.4	4418.5	12964.3	28660.3
F7	13	-3387.7	-1997.8	-1605.4	-1715.4
F8	13	-2019.7	-1177.2	-1008.1	-1195.6
F9	13	-3260.4	-1872.4	-1497.1	-1593.4
F10	13	-3508.6	-2076.9	-1649.1	-1743
F11	13	-3856	-2211.2	-1731.4	-1743.6
F12	13	-3147.8	-1761.8	-1416.7	-1411.9
G1	13	11221.5	6792.1	15468.3	32873.6
G2	13	16111.5	9864.2	16649.4	31669
G3	13	9083.5	5360.6	15326	33651.6
G4	13	12624.9	7511.2	16276.7	33587.8
G5	13	17415.3	10587	17169.7	32074
G6	13	8815.2	5158	14806	32508.3
G7	13	-3544.6	-2053.3	-1412.7	-1291
G8	13	-1737.3	-916.199	-660	-757.398
G9	13	-3603.5	-2082	-1608.4	-1661.9
G10	13	-3683.5	-2164.4	-1727.4	-1800.4
G11	13	-3580.3	-2005.3	-1498.4	-1410.6
G12	13	-2723.6	-1447.5	-1058.1	-1004.3
H1	13	4031.2	2628.1	13284.8	32210.8
H2	13	8908.1	5586.8	14227.9	30910.8
H3	13	-116.102	-84.1992	11939.6	32017.5
H4	13	3682.5	2360.6	13181.9	32085.4
H5	13	10743.6	6909.2	15962.4	33224.9
H6	13	266.898	161.102	11830.6	31159.3
H7	13	-3885.8	-2231	-1818.4	-2131.7
H8	13	-4194.9	-2435	-2019.5	-2257.7
H9	13	-1479.4	-688	-470.199	-674.602
H10	13	-4183.6	-2472.2	-2058	-2285
H11	13	-2524.8	-1404.8	-1230.7	-1456.2
H12	13	-2832.2	-1477.1	-1140.7	-1159.8
A1	14	13244.9	8058.1	15949.6	32303.6
A2	14	18371.5	10882.4	17650.8	33010.1
A3	14	7808.2	4578.1	12163.8	26694.1
A4	14	12496.6	7531.9	14955.7	29971
A5	14	17459.3	10681.1	16862	31174.7
A6	14	9311.8	5462.1	14119.3	30514.3
A7	14	-4019.2	-2365.9	-1886.5	-2308.3
A8	14	-3465.7	-1927.8	-1482.6	-1576.8
A9	14	-2599.6	-1382.2	-1023.4	-1145.4
A10	14	-4094.3	-2405.2	-2089	-2259.6
A11	14	-3697.4	-2179.1	-1804.6	-2013.7
A12	14	-3743	-2152.9	-1943.2	-2000.2
B1	14	12448.9	7489.5	15745.3	32320.6
B2	14	19707.8	12000.1	18233.9	32922.7
B3	14	9726	5556.7	14091.2	30279.7
B4	14	12078.6	7055.5	14629.8	29708
B5	14	20750.3	12393.3	18871.5	34272
B6	14	6017.4	3508.5	11109.5	25218.9
B7	14	-2704.2	-1470.9	-1025.8	-1099.6
B8	14	-2644.1	-1487.1	-1077	-1200.6
B9	14	-3668.3	-2094.8	-1609	-1750.2
B10	14	-3154.5	-1853.1	-1427.1	-1664
B11	14	-3690.6	-2067.7	-1510.6	-1635.6
B12	14	-3624.2	-2099.4	-1714.6	-1751.9
C1	14	13163.3	7721	16009.4	32909.5
C2	14	17576.4	10466.6	16738.3	31171.1
C3	14	9342.2	5130.8	13595.7	29452.5
C4	14	13890.9	8110.4	16226.4	32807.8
C5	14	16116.5	9640.5	15831.1	29788.1
C6	14	9920.3	5641.8	14583.6	31656.1
C7	14	-4932.8	-2577.6	-1785.9	-1722.7
C8	14	-3303.7	-1901	-1469.9	-1621.9
C9	14	-2545.1	-1445.6	-1083.1	-1224.9
C10	14	-4098.6	-2448	-1980.1	-2156.4
C11	14	-4145.7	-2433	-1935.6	-2062.4
C12	14	-3693	-2162.9	-1815.3	-2000.8
D1	14	3547.8	2326.5	12277.3	29591.5
D2	14	10227.8	6292.8	15217.6	32240.3
D3	14	34.8008	-90.5	11976.9	31774.8
D4	14	4257.2	2701.7	13240	31539.4
D5	14	10391.4	6433.3	15900.2	33854.8
D6	14	1101.5	677.801	11380.2	28984.7
D7	14	-2868.9	-1635.6	-1205	-1274
D8	14	-3393.1	-1968.6	-1519.1	-1675.5
D9	14	-3159.6	-1831.9	-1447.2	-1613.9
D10	14	-3299.5	-1828.5	-1369.8	-1482.8
D11	14	-2841.6	-1634.9	-1247.1	-1433
D12	14	-3118.5	-1788.8	-1449.9	-1539.3
E1	14	11406	6829.5	14951.4	31094.5
E2	14	17978.5	10718.5	17126	31734
E3	14	7757.6	4425.3	13952.5	31464.8
E4	14	11773.1	7123	15452.8	31766.2
E5	14	20114.8	12110.9	18857.2	34534.8
E6	14	8433.5	4912.1	13714.4	29943.9
E7	14	-2312.6	-1245.7	-824.602	-884.5
E8	14	-2376.4	-1348.8	-1009.7	-1173.1
E9	14	-2328.6	-1407.7	-1133.9	-1280
E10	14	-3639	-2148.5	-1690.8	-1720.8
E11	14	-2691.2	-1524.3	-1174.5	-1312.7
E12	14	-2946.8	-1670.5	-1364.5	-1498.9
F1	14	10245.4	6231.8	14921.9	31836.8
F2	14	17700	10662.9	17421.6	32715.5
F3	14	7858.2	4478.9	13990.9	31496.9
F4	14	12545.9	7502.3	16097.1	32918.1
F5	14	17945.7	11268	17937.7	32814.9
F6	14	7750.4	4503.5	13005.3	28664.3
F7	14	-3384.7	-1993.8	-1584.4	-1708.4
F8	14	-1983.7	-1176.2	-998.102	-1197.6
F9	14	-3251.4	-1872.4	-1499.1	-1611.4
F10	14	-3519.6	-2077.9	-1639.1	-1738
F11	14	-3866	-2212.2	-1731.4	-1759.6
F12	14	-3142.8	-1754.8	-1399.7	-1386.9
G1	14	11358.5	6859.1	15495.3	32881.6
G2	14	16197.5	9916.2	16676.4	31684
G3	14	9284.5	5458.6	15362	33585.6
G4	14	12746.9	7560.2	16269.7	33478.8
G5	14	17435.3	10584	17154.7	32008
G6	14	9014.2	5292	14844	32498.3
G7	14	-3551.6	-2067.3	-1415.7	-1279
G8	14	-1729.3	-924.199	-678	-738.398
G9	14	-3581.5	-2090	-1608.4	-1659.9
G10	14	-3674.5	-2151.4	-1714.4	-1792.4
G11	14	-3581.3	-2023.3	-1513.4	-1417.6
G12	14	-2719.6	-1431.5	-1044.1	-1008.3
H1	14	4022.2	2627.1	13258.8	32108.8
H2	14	8899.1	5568.8	14180.9	30861.8
H3	14	-112.102	-70.1992	11931.6	31953.5
H4	14	3666.5	2376.6	13159.9	31982.4
H5	14	10690.6	6859.2	15947.4	33141.9
H6	14	264.898	182.102	11840.6	31173.3
H7	14	-3888.8	-2219	-1820.4	-2132.7
H8	14	-4190.9	-2415	-1998.5	-2244.7
H9	14	-1516.4	-681	-472.199	-675.602
H10	14	-4186.6	-2452.2	-2064	-2280
H11	14	-2518.8	-1426.8	-1226.7	-1419.2
H12	14	-2837.2	-1458.1	-1114.7	-1157.8
A1	15	13389.9	8147.1	15952.6	32183.6
A2	15	18487.5	10900.4	17625.8	32957.1
A3	15	8071.2	4719.1	12238.8	26730.1
A4	15	12617.6	7572.9	14958.7	29893
A5	15	17630.3	10781.1	16933	31256.7
A6	15	9657.8	5647.1	14225.3	30546.3
A7	15	-4030.2	-2378.9	-1902.5	-2308.3
A8	15	-3450.7	-1937.8	-1490.6	-1570.8
A9	15	-2599.6	-1402.2	-1041.4	-1158.4
A10	15	-4124.3	-2418.2	-2097	-2287.6
A11	15	-3715.4	-2206.1	-1812.6	-2024.7
A12	15	-3765	-2179.9	-1955.2	-1992.2
B1	15	12559.9	7555.5	15746.3	32249.6
B2	15	19782.8	12012.1	18177.9	32814.7
B3	15	10016	5698.7	14195.2	30349.7
B4	15	12158.6	7083.5	14564.8	29519
B5	15	21207.3	12673.3	19148.5	34673
B6	15	6212.4	3604.5	11055.5	25042.9
B7	15	-2708.2	-1453.9	-1012.8	-1118.6
B8	15	-2688.1	-1506.1	-1084	-1224.6
B9	15	-3666.3	-2098.8	-1606	-1763.2
B10	15	-3163.5	-1871.1	-1441.1	-1673
B11	15	-3697.6	-2098.7	-1534.6	-1672.6
B12	15	-3618.2	-2108.4	-1685.6	-1763.9
C1	15	13212.3	7756	15944.4	32717.5
C2	15	17858.4	10581.6	16843.3	31278.1
C3	15	9668.2	5298.8	13673.7	29508.5
C4	15	14154.9	8231.4	16314.4	32911.8
C5	15	15876.5	9468.5	15519.1	29190.1
C6	15	10252.3	5810.8	14644.6	31624.1
C7	15	-4933.8	-2594.6	-1791.9	-1724.7
C8	15	-3306.7	-1909	-1470.9	-1632.9
C9	15	-2548.1	-1460.6	-1090.1	-1219.9
C10	15	-4078.6	-2469	-1967.1	-2155.4
C11	15	-4145.7	-2432	-1921.6	-2080.4
C12	15	-3711	-2163.9	-1814.3	-2002.8
D1	15	3526.8	2330.5	12266.3	29533.5
D2	15	10200.8	6253.8	15162.6	32164.3
D3	15	34.8008	-104.5	11957.9	31705.8
D4	15	4275.2	2731.7	13307	31626.4
D5	15	10402.4	6413.3	15906.2	33840.8
D6	15	1077.5	662.801	11339.2	28896.7
D7	15	-2900.9	-1632.6	-1224	-1298
D8	15	-3386.1	-1956.6	-1542.1	-1689.5
D9	15	-3159.6	-1844.9	-1432.2	-1627.9
D10	15	-3299.5	-1831.5	-1375.8	-1465.8
D11	15	-2831.6	-1624.9	-1288.1	-1459
D12	15	-3119.5	-1799.8	-1426.9	-1561.3
E1	15	11501	6886.5	14984.4	31143.5
E2	15	17982.5	10691.5	17076	31580
E3	15	8006.6	4562.3	14019.5	31478.8
E4	15	11902.1	7172	15497.8	31819.2
E5	15	20183.8	12111.9	18830.2	34439.8
E6	15	8657.5	5021.1	13736.4	29885.9
E7	15	-2322.6	-1262.7	-846.602	-900.5
E8	15	-2398.4	-1350.8	-1041.7	-1187.1
E9	15	-2322.6	-1382.7	-1127.9	-1288
E10	15	-3660	-2145.5	-1708.8	-1746.8
E11	15	-2663.2	-1499.3	-1191.5	-1316.7
E12	15	-2978.8	-1675.5	-1394.5	-1501.9
F1	15	10364.4	6251.8	14952.9	31862.8
F2	15	17745	10666.9	17379.6	32595.5
F3	15	8094.2	4609.9	14031.9	31447.9
F4	15	12656.9	7545.3	16116.1	32897.1
F5	15	18074.7	11340	17991.7	32883.9
F6	15	8001.4	4631.5	13052.3	28652.3
F7	15	-3391.7	-1990.8	-1598.4	-1721.4
F8	15	-2003.7	-1180.2	-993.102	-1194.6
F9	15	-3234.4	-1879.4	-1482.1	-1640.4
F10	15	-3540.6	-2082.9	-1673.1	-1757
F11	15	-3842	-2207.2	-1746.4	-1740.6
F12	15	-3133.8	-1753.8	-1390.7	-1375.9
G1	15	11420.5	6869.1	15490.3	32787.6
G2	15	16203.5	9939.2	16627.4	31586
G3	15	9560.5	5615.6	15418	33659.6
G4	15	12837.9	7602.2	16266.7	33484.8
G5	15	17507.3	10614	17141.7	31960
G6	15	9278.2	5405	14873	32451.3
G7	15	-3550.6	-2051.3	-1435.7	-1279
G8	15	-1728.3	-933.199	-681	-757.398
G9	15	-3582.5	-2084	-1617.4	-1674.9
G10	15	-3675.5	-2170.4	-1733.4	-1811.4
G11	15	-3578.3	-2022.3	-1508.4	-1410.6
G12	15	-2714.6	-1433.5	-1037.1	-1010.3
H1	15	4019.2	2609.1	13225.8	32040.8
H2	15	8873.1	5532.8	14147.9	30801.8
H3	15	-129.102	-94.1992	11903.6	31899.5
H4	15	3635.5	2347.6	13128.9	31941.4
H5	15	10669.6	6849.2	15897.4	33069.9
H6	15	296.898	170.102	11806.6	31109.3
H7	15	-3905.8	-2239	-1844.4	-2131.7
H8	15	-4189.9	-2427	-2013.5	-2229.7
H9	15	-1498.4	-684	-475.199	-690.602
H10	15	-4176.6	-2465.2	-2064	-2287
H11	15	-2536.8	-1429.8	-1235.7	-1433.2
H12	15	-2830.2	-1478.1	-1124.7	-1162.8
A1	16	13581.9	8240.1	15994.6	32162.6
A2	16	18633.5	10999.4	17662.8	32957.1
A3	16	8476.2	4932.1	12334.8	26726.1
A4	16	12856.6	7709.9	15041.7	29917
A5	16	17697.3	10810.1	16881	31123.7
A6	16	10118.8	5893.1	14336.3	30540.3
A7	16	-4025.2	-2368.9	-1907.5	-2311.3
A8	16	-3438.7	-1922.8	-1492.6	-1571.8
A9	16	-2601.6	-1376.2	-1016.4	-1158.4
A10	16	-4096.3	-2420.2	-2085	-2286.6
A11	16	-3705.4	-2175.1	-1814.6	-2008.7
A12	16	-3738	-2167.9	-1925.2	-2012.2
B1	16	12771.9	7651.5	15782.3	32250.6
B2	16	20092.8	12173.1	18345.9	33052.7
B3	16	10439	5917.7	14263.2	30312.7
B4	16	12459.6	7265.5	14735.8	29780
B5	16	21033.3	12563.3	18930.5	34232
B6	16	6565.4	3793.5	11179.5	25118.9
B7	16	-2720.2	-1474.9	-1011.8	-1103.6
B8	16	-2673.1	-1522.1	-1112	-1228.6
B9	16	-3678.3	-2121.8	-1602	-1747.2
B10	16	-3176.5	-1866.1	-1430.1	-1669
B11	16	-3731.6	-2105.7	-1546.6	-1669.6
B12	16	-3610.2	-2103.4	-1679.6	-1759.9
C1	16	13379.3	7834	15966.4	32677.5
C2	16	17785.4	10557.6	16752.3	31098.1
C3	16	10068.2	5533.8	13765.7	29480.5
C4	16	14236.9	8294.4	16263.4	32708.8
C5	16	16331.5	9738.5	15841.1	29737.1
C6	16	10710.3	6042.8	14779.6	31693.1
C7	16	-4940.8	-2591.6	-1799.9	-1738.7
C8	16	-3316.7	-1922	-1454.9	-1634.9
C9	16	-2519.1	-1447.6	-1077.1	-1221.9
C10	16	-4074.6	-2455	-1984.1	-2167.4
C11	16	-4152.7	-2433	-1917.6	-2070.4
C12	16	-3681	-2143.9	-1823.3	-2000.8
D1	16	3510.8	2312.5	12202.3	29477.5
D2	16	10201.8	6234.8	15161.6	32124.3
D3	16	10.8008	-102.5	11917.9	31654.8
D4	16	4229.2	2692.7	13212	31447.4
D5	16	10445.4	6433.3	15929.2	33873.8
D6	16	1128.5	678.801	11340.2	28851.7
D7	16	-2894.9	-1653.6	-1244	-1300
D8	16	-3379.1	-1967.6	-1538.1	-1715.5
D9	16	-3167.6	-1830.9	-1442.2	-1619.9
D10	16	-3291.5	-1824.5	-1368.8	-1474.8
D11	16	-2846.6	-1632.9	-1292.1	-1441
D12	16	-3096.5	-1789.8	-1434.9	-1542.3
E1	16	11577	6903.5	14991.4	31126.5
E2	16	18051.5	10731.5	17068	31542
E3	16	8416.6	4763.3	14124.5	31506.8
E4	16	11974.1	7189	15484.8	31770.2
E5	16	20230.8	12170.9	18812.2	34387.8
E6	16	9062.5	5247.1	13831.4	29944.9
E7	16	-2318.6	-1250.7	-837.602	-874.5
E8	16	-2391.4	-1340.8	-1032.7	-1177.1
E9	16	-2338.6	-1412.7	-1126.9	-1276
E10	16	-3665	-2160.5	-1697.8	-1715.8
E11	16	-2678.2	-1519.3	-1191.5	-1318.7
E12	16	-2966.8	-1686.5	-1388.5	-1485.9
F1	16	10488.4	6324.8	14990.9	31904.8
F2	16	17805	10691.9	17356.6	32541.5
F3	16	8516.2	4788.9	14121.9	31466.9
F4	16	12863.9	7689.3	16218.1	33062.1
F5	16	18120.7	11334	18000.7	32844.9
F6	16	8388.4	4870.5	13199.3	28724.3
F7	16	-3390.7	-1995.8	-1599.4	-1721.4
F8	16	-1990.7	-1179.2	-1007.1	-1207.6
F9	16	-3250.4	-1876.4	-1475.1	-1611.4
F10	16	-3491.6	-2095.9	-1651.1	-1743
F11	16	-3836	-2208.2	-1721.4	-1769.6
F12	16	-3146.8	-1780.8	-1402.7	-1407.9
G1	16	11515.5	6952.1	15510.3	32779.6
G2	16	16277.5	9937.2	16631.4	31514
G3	16	9947.5	5827.6	15521	33628.6
G4	16	12925.9	7652.2	16269.7	33393.8
G5	16	17677.3	10704	17213.7	32030
G6	16	9710.2	5651	15013	32516.3
G7	16	-3570.6	-2056.3	-1411.7	-1292
G8	16	-1742.3	-921.199	-679	-747.398
G9	16	-3592.5	-2117	-1610.4	-1685.9
G10	16	-3660.5	-2156.4	-1736.4	-1819.4
G11	16	-3572.3	-2001.3	-1495.4	-1405.6
G12	16	-2722.6	-1426.5	-1059.1	-1000.3
H1	16	4013.2	2598.1	13200.8	32002.8
H2	16	8886.1	5547.8	14149.9	30781.8
H3	16	-102.102	-96.1992	11922.6	31926.5
H4	16	3672.5	2372.6	13111.9	31888.4
H5	16	10671.6	6847.2	15879.4	33063.9
H6	16	286.898	198.102	11818.6	31104.3
H7	16	-3900.8	-2245	-1832.4	-2111.7
H8	16	-4175.9	-2432	-2005.5	-2251.7
H9	16	-1505.4	-688	-480.199	-686.602
H10	16	-4164.6	-2448.2	-2065	-2295
H11	16	-2535.8	-1420.8	-1232.7	-1411.2
H12	16	-2813.2	-1468.1	-1122.7	-1132.8
A1	17	13831.9	8363.1	16040.6	32157.6
A2	17	18745.5	11034.4	17661.8	32912.1
A3	17	9122.2	5280.1	12513.8	26792.1
A4	17	13015.6	7802.9	15067.7	29891
A5	17	17868.3	10873.1	16944	31175.7
A6	17	10876.8	6301.1	14507.3	30607.3
A7	17	-4031.2	-2388.9	-1922.5	-2316.3
A8	17	-3433.7	-1952.8	-1489.6	-1583.8
A9	17	-2592.6	-1373.2	-1042.4	-1137.4
A10	17	-4099.3	-2423.2	-2100	-2256.6
A11	17	-3699.4	-2195.1	-1811.6	-2023.7
A12	17	-3742	-2149.9	-1932.2	-2001.2
B1	17	12944.9	7720.5	15806.3	32227.6
B2	17	19999.8	12109.1	18209.9	32816.7
B3	17	11157	6333.7	14493.2	30420.7
B4	17	12609.6	7296.5	14691.8	29638
B5	17	21217.3	12625.3	18974.5	34277
B6	17	7126.4	4093.5	11318.5	25120.9
B7	17	-2718.2	-1467.9	-1041.8	-1121.6
B8	17	-2669.1	-1508.1	-1100	-1233.6
B9	17	-3653.3	-2135.8	-1606	-1739.2
B10	17	-3191.5	-1886.1	-1442.1	-1680
B11	17	-3706.6	-2085.7	-1528.6	-1658.6
B12	17	-3592.2	-2095.4	-1688.6	-1779.9
C1	17	13577.3	7914	15997.4	32655.5
C2	17	18053.4	10671.6	16854.3	31224.1
C3	17	10755.2	5890.8	13930.7	29476.5
C4	17	14481.9	8403.4	16323.4	32801.8
C5	17	16325.5	9726.5	15748.1	29496.1
C6	17	11399.3	6418.8	14921.6	31695.1
C7	17	-4922.8	-2568.6	-1788.9	-1711.7
C8	17	-3320.7	-1932	-1477.9	-1641.9
C9	17	-2531.1	-1472.6	-1090.1	-1214.9
C10	17	-4088.6	-2456	-1987.1	-2170.4
C11	17	-4166.7	-2452	-1937.6	-2109.4
C12	17	-3689	-2155.9	-1823.3	-2000.8
D1	17	3535.8	2319.5	12232.3	29474.5
D2	17	10127.8	6206.8	15077.6	32003.3
D3	17	38.8008	-118.5	11888.9	31550.8
D4	17	4220.2	2683.7	13219	31433.4
D5	17	10344.4	6367.3	15794.2	33623.8
D6	17	1137.5	665.801	11341.2	28858.7
D7	17	-2858.9	-1654.6	-1226	-1300
D8	17	-3386.1	-1960.6	-1544.1	-1710.5
D9	17	-3156.6	-1853.9	-1437.2	-1608.9
D10	17	-3275.5	-1834.5	-1368.8	-1484.8
D11	17	-2848.6	-1647.9	-1297.1	-1460
D12	17	-3090.5	-1792.8	-1440.9	-1528.3
E1	17	11679	6968.5	15006.4	31092.5
E2	17	18189.5	10787.5	17100	31571
E3	17	9052.6	5113.3	14278.5	31546.8
E4	17	12056.1	7236	15484.8	31691.2
E5	17	20283.8	12165.9	18784.2	34352.8
E6	17	9730.5	5599.1	14021.4	30013.9
E7	17	-2309.6	-1232.7	-834.602	-899.5
E8	17	-2392.4	-1340.8	-1029.7	-1190.1
E9	17	-2317.6	-1419.7	-1114.9	-1285
E10	17	-3624	-2148.5	-1709.8	-1739.8
E11	17	-2671.2	-1534.3	-1179.5	-1325.7
E12	17	-2958.8	-1675.5	-1378.5	-1514.9
F1	17	10587.4	6385.8	14994.9	31862.8
F2	17	17889	10731.9	17352.6	32520.5
F3	17	9175.2	5155.9	14271.9	31459.9
F4	17	12897.9	7682.3	16177.1	32950.1
F5	17	18171.7	11381	17969.7	32780.9
F6	17	9017.4	5194.5	13296.3	28712.3
F7	17	-3369.7	-1973.8	-1607.4	-1711.4
F8	17	-1970.7	-1204.2	-1001.1	-1211.6
F9	17	-3249.4	-1880.4	-1496.1	-1605.4
F10	17	-3505.6	-2083.9	-1644.1	-1755
F11	17	-3820	-2217.2	-1738.4	-1776.6
F12	17	-3128.8	-1765.8	-1417.7	-1412.9
G1	17	11605.5	6943.1	15485.3	32695.6
G2	17	16281.5	9900.2	16542.4	31379
G3	17	10610.5	6182.6	15706	33687.6
G4	17	13007.9	7684.2	16259.7	33347.8
G5	17	17746.3	10719	17199.7	32018
G6	17	10376.2	5996	15186	32577.3
G7	17	-3561.6	-2070.3	-1425.7	-1304
G8	17	-1741.3	-918.199	-686	-754.398
G9	17	-3579.5	-2109	-1619.4	-1672.9
G10	17	-3663.5	-2154.4	-1731.4	-1822.4
G11	17	-3552.3	-2015.3	-1489.4	-1391.6
G12	17	-2717.6	-1418.5	-1042.1	-1002.3
H1	17	3999.2	2596.1	13189.8	31908.8
H2	17	8884.1	5555.8	14189.9	30813.8
H3	17	-147.102	-112.199	11860.6	31824.5
H4	17	3638.5	2327.6	13077.9	31822.4
H5	17	10639.6	6833.2	15865.4	33024.9
H6	17	277.898	158.102	11764.6	31034.3
H7	17	-3913.8	-2245	-1823.4	-2111.7
H8	17	-4192.9	-2465	-2021.5	-2247.7
H9	17	-1487.4	-689	-486.199	-680.602
H10	17	-4177.6	-2458.2	-2068	-2305
H11	17	-2514.8	-1406.8	-1234.7	-1447.2
H12	17	-2865.2	-1504.1	-1156.7	-1196.8
A1	18	14056.9	8506.1	16079.6	32107.6
A2	18	18828.5	11076.4	17661.8	32858.1
A3	18	10286.2	5882.1	12849.8	26928.1
A4	18	13245.6	7940.9	15099.7	29871
A5	18	17894.3	10891.1	16846	31014.7
A6	18	12183.8	7031.1	14941.3	30858.3
A7	18	-4013.2	-2376.9	-1926.5	-2328.3
A8	18	-3429.7	-1949.8	-1484.6	-1571.8
A9	18	-2607.6	-1385.2	-1052.4	-1145.4
A10	18	-4102.3	-2414.2	-2103	-2275.6
A11	18	-3704.4	-2173.1	-1818.6	-2017.7
A12	18	-3748	-2162.9	-1951.2	-2014.2
B1	18	13141.9	7835.5	15830.3	32148.6
B2	18	20097.8	12183.1	18220.9	32763.7
B3	18	12348	6944.7	14822.2	30530.7
B4	18	12888.6	7445.5	14812.8	29756
B5	18	21158.3	12576.3	18840.5	34007
B6	18	8018.4	4596.5	11534.5	25073.9
B7	18	-2736.2	-1465.9	-1028.8	-1121.6
B8	18	-2671.1	-1489.1	-1104	-1223.6
B9	18	-3649.3	-2133.8	-1610	-1757.2
B10	18	-3178.5	-1872.1	-1443.1	-1704
B11	18	-3744.6	-2130.7	-1549.6	-1673.6
B12	18	-3597.2	-2106.4	-1680.6	-1739.9
C1	18	13858.3	8061	16093.4	32706.5
C2	18	17917.4	10619.6	16715.3	30942.1
C3	18	11933.2	6504.8	14230.7	29583.5
C4	18	14701.9	8482.4	16353.4	32713.8
C5	18	16575.5	9860.5	15873.1	29730.1
C6	18	12629.3	7076.8	15300.6	31849.1
C7	18	-4925.8	-2599.6	-1804.9	-1719.7
C8	18	-3326.7	-1920	-1462.9	-1634.9
C9	18	-2516.1	-1464.6	-1082.1	-1218.9
C10	18	-4079.6	-2460	-1980.1	-2174.4
C11	18	-4138.7	-2432	-1912.6	-2086.4
C12	18	-3700	-2167.9	-1831.3	-2012.8
D1	18	3538.8	2296.5	12206.3	29459.5
D2	18	10124.8	6236.8	15086.6	31999.3
D3	18	46.8008	-95.5	11890.9	31534.8
D4	18	4210.2	2683.7	13149	31340.4
D5	18	10394.4	6413.3	15888.2	33808.8
D6	18	1132.5	670.801	11306.2	28837.7
D7	18	-2867.9	-1646.6	-1220	-1298
D8	18	-3414.1	-1963.6	-1553.1	-1716.5
D9	18	-3162.6	-1842.9	-1432.2	-1639.9
D10	18	-3260.5	-1833.5	-1375.8	-1467.8
D11	18	-2833.6	-1631.9	-1288.1	-1439
D12	18	-3097.5	-1784.8	-1420.9	-1548.3
E1	18	11770	7019.5	15034.4	31122.5
E2	18	18272.5	10795.5	17106	31555
E3	18	10184.6	5714.3	14582.5	31625.8
E4	18	12112.1	7274	15473.8	31681.2
E5	18	20402.8	12259.9	18846.2	34401.8
E6	18	10901.5	6234.1	14329.4	30126.9
E7	18	-2304.6	-1240.7	-831.602	-907.5
E8	18	-2391.4	-1364.8	-1036.7	-1181.1
E9	18	-2338.6	-1425.7	-1131.9	-1284
E10	18	-3646	-2132.5	-1719.8	-1746.8
E11	18	-2656.2	-1536.3	-1190.5	-1340.7
E12	18	-2976.8	-1686.5	-1385.5	-1532.9
F1	18	10666.4	6423.8	15018.9	31875.8
F2	18	17956	10750.9	17343.6	32438.5
F3	18	10383.2	5801.9	14615.9	31638.9
F4	18	13001.9	7742.3	16224.1	32956.1
F5	18	18170.7	11355	17914.7	32654.9
F6	18	10222.4	5822.5	13681.3	28930.3
F7	18	-3383.7	-1982.8	-1601.4	-1718.4
F8	18	-1965.7	-1172.2	-993.102	-1220.6
F9	18	-3274.4	-1885.4	-1495.1	-1623.4
F10	18	-3485.6	-2086.9	-1656.1	-1755
F11	18	-3835	-2215.2	-1744.4	-1756.6
F12	18	-3135.8	-1781.8	-1410.7	-1407.9
G1	18	11637.5	6979.1	15460.3	32631.6
G2	18	16376.5	9983.2	16589.4	31411
G3	18	11862.5	6852.6	16042	33836.6
G4	18	13057.9	7687.2	16235.7	33267.8
G5	18	17814.3	10744	17203.7	31992
G6	18	11577.2	6655	15534	32697.3
G7	18	-3583.6	-2073.3	-1419.7	-1311
G8	18	-1750.3	-929.199	-661	-772.398
G9	18	-3580.5	-2112	-1610.4	-1670.9
G10	18	-3657.5	-2150.4	-1729.4	-1809.4
G11	18	-3570.3	-2009.3	-1499.4	-1389.6
G12	18	-2726.6	-1445.5	-1045.1	-1020.3
H1	18	3987.2	2598.1	13152.8	31873.8
H2	18	8845.1	5522.8	14107.9	30713.8
H3	18	-123.102	-116.199	11845.6	31841.5
H4	18	3630.5	2342.6	13038.9	31776.4
H5	18	10602.6	6801.2	15824.4	32938.9
H6	18	269.898	162.102	11753.6	30984.3
H7	18	-3912.8	-2256	-1829.4	-2128.7
H8	18	-4193.9	-2440	-2012.5	-2271.7
H9	18	-1506.4	-681	-491.199	-691.602
H10	18	-4192.6	-2484.2	-2088	-2319
H11	18	-2538.8	-1432.8	-1245.7	-1421.2
H12	18	-2838.2	-1470.1	-1154.7	-1175.8
A1	19	14417.9	8653.1	16139.6	32094.6
A2	19	18960.5	11112.4	17686.8	32838.1
A3	19	12404.2	7046.1	13462.8	27203.1
A4	19	13606.6	8092.9	15177.7	29885
A5	19	18169.3	11071.1	17010	31246.7
A6	19	14561.8	8317.1	15573.3	31055.3
A7	19	-4029.2	-2385.9	-1915.5	-2312.3
A8	19	-3453.7	-1937.8	-1478.6	-1577.8
A9	19	-2587.6	-1419.2	-1038.4	-1161.4
A10	19	-4098.3	-2429.2	-2077	-2283.6
A11	19	-3679.4	-2202.1	-1807.6	-2038.7
A12	19	-3740	-2170.9	-1941.2	-1997.2
B1	19	13490.9	8041.5	15941.3	32205.6
B2	19	20301.8	12252.1	18264.9	32800.7
B3	19	14630	8208.7	15504.2	30903.7
B4	19	12982.6	7507.5	14664.8	29330
B5	19	21470.3	12771.3	19024.5	34268
B6	19	9784.4	5544.5	12027.5	25286.9
B7	19	-2740.2	-1475.9	-1034.8	-1116.6
B8	19	-2650.1	-1505.1	-1102	-1229.6
B9	19	-3646.3	-2133.8	-1622	-1791.2
B10	19	-3168.5	-1871.1	-1449.1	-1673
B11	19	-3719.6	-2089.7	-1549.6	-1677.6
B12	19	-3590.2	-2096.4	-1699.6	-1749.9
C1	19	14089.3	8205	16069.4	32534.5
C2	19	18174.4	10716.6	16808.3	31039.1
C3	19	14188.2	7750.8	14904.7	29896.5
C4	19	15070.9	8711.4	16498.4	32820.8
C5	19	16488.5	9801.5	15711.1	29376.1
C6	19	14872.3	8293.8	15940.6	32154.1
C7	19	-4903.8	-2564.6	-1788.9	-1725.7
C8	19	-3304.7	-1922	-1466.9	-1625.9
C9	19	-2526.1	-1458.6	-1095.1	-1221.9
C10	19	-4091.6	-2466	-1994.1	-2155.4
C11	19	-4161.7	-2445	-1942.6	-2084.4
C12	19	-3685	-2146.9	-1832.3	-2000.8
D1	19	3513.8	2303.5	12178.3	29367.5
D2	19	10109.8	6187.8	15080.6	31977.3
D3	19	33.8008	-105.5	11884.9	31505.8
D4	19	4229.2	2676.7	13162	31374.4
D5	19	10260.4	6305.3	15687.2	33430.8
D6	19	1123.5	665.801	11332.2	28864.7
D7	19	-2885.9	-1665.6	-1245	-1304
D8	19	-3374.1	-1970.6	-1531.1	-1694.5
D9	19	-3175.6	-1848.9	-1449.2	-1621.9
D10	19	-3278.5	-1822.5	-1373.8	-1467.8
D11	19	-2832.6	-1640.9	-1276.1	-1456
D12	19	-3092.5	-1780.8	-1443.9	-1544.3
E1	19	11852	7042.5	15037.4	31083.5
E2	19	18266.5	10816.5	17057	31440
E3	19	12364.6	6906.3	15230.5	31962.8
E4	19	12290.1	7350	15555.8	31761.2
E5	19	20387.8	12237.9	18777.2	34226.8
E6	19	13143.5	7464.1	14989.4	30453.9
E7	19	-2300.6	-1255.7	-851.602	-900.5
E8	19	-2402.4	-1377.8	-1052.7	-1190.1
E9	19	-2337.6	-1413.7	-1127.9	-1292
E10	19	-3620	-2129.5	-1691.8	-1724.8
E11	19	-2666.2	-1516.3	-1192.5	-1337.7
E12	19	-2965.8	-1688.5	-1387.5	-1511.9
F1	19	10778.4	6481.8	15059.9	31869.8
F2	19	18057	10801.9	17390.6	32472.5
F3	19	12649.2	7052.9	15286.9	31881.9
F4	19	13075.9	7758.3	16185.1	32870.1
F5	19	18317.7	11437	17976.7	32750.9
F6	19	12416.4	7049.5	14310.3	29198.3
F7	19	-3376.7	-2000.8	-1586.4	-1717.4
F8	19	-1977.7	-1185.2	-1009.1	-1221.6
F9	19	-3244.4	-1891.4	-1504.1	-1623.4
F10	19	-3502.6	-2080.9	-1671.1	-1777
F11	19	-3832	-2207.2	-1750.4	-1759.6
F12	19	-3143.8	-1767.8	-1416.7	-1417.9
G1	19	11761.5	7049.1	15488.3	32621.6
G2	19	16416.5	10003.2	16572.4	31344
G3	19	14156.5	8111.6	16743	34155.6
G4	19	13149.9	7732.2	16264.7	33268.8
G5	19	17867.3	10797	17225.7	31958
G6	19	13819.2	7870	16147	32919.3
G7	19	-3558.6	-2093.3	-1433.7	-1309
G8	19	-1750.3	-921.199	-687	-752.398
G9	19	-3586.5	-2097	-1638.4	-1677.9
G10	19	-3672.5	-2151.4	-1780.4	-1801.4
G11	19	-3547.3	-2018.3	-1490.4	-1403.6
G12	19	-2732.6	-1432.5	-1059.1	-1018.3
H1	19	3975.2	2576.1	13133.8	31825.8
H2	19	8823.1	5507.8	14096.9	30659.8
H3	19	-121.102	-114.199	11830.6	31782.5
H4	19	3627.5	2332.6	13031.9	31792.4
H5	19	10608.6	6788.2	15821.4	32930.9
H6	19	270.898	135.102	11755.6	30950.3
H7	19	-3893.8	-2228	-1835.4	-2113.7
H8	19	-4177.9	-2445	-2009.5	-2276.7
H9	19	-1502.4	-680	-491.199	-698.602
H10	19	-4187.6	-2486.2	-2056	-2317
H11	19	-2504.8	-1435.8	-1222.7	-1430.2
H12	19	-2839.2	-1471.1	-1155.7	-1199.8
A1	20	14937.9	8956.1	16289.6	32082.6
A2	20	19030.5	11164.4	17673.8	32807.1
A3	20	16384.2	9227.1	14664.8	27832.1
A4	20	14131.6	8367.9	15301.7	29978
A5	20	18200.3	11023.1	16946	31047.7
A6	20	19071.8	10796.1	16925.3	31748.3
A7	20	-4047.2	-2370.9	-1937.5	-2333.3
A8	20	-3454.7	-1958.8	-1497.6	-1577.8
A9	20	-2581.6	-1376.2	-1031.4	-1142.4
A10	20	-4082.3	-2419.2	-2107	-2280.6
A11	20	-3673.4	-2182.1	-1812.6	-2014.7
A12	20	-3719	-2174.9	-1951.2	-2003.2
B1	20	14049.9	8334.5	16096.3	32284.6
B2	20	20412.8	12324.1	18306.9	32842.7
B3	20	18739	10382.7	16640.2	31370.7
B4	20	13386.6	7686.5	14699.8	29200
B5	20	21436.3	12725.3	18886.5	34005
B6	20	13127.4	7393.5	13014.5	25731.9
B7	20	-2716.2	-1495.9	-1039.8	-1124.6
B8	20	-2664.1	-1519.1	-1098	-1223.6
B9	20	-3655.3	-2126.8	-1613	-1757.2
B10	20	-3199.5	-1880.1	-1454.1	-1677
B11	20	-3725.6	-2105.7	-1551.6	-1673.6
B12	20	-3605.2	-2094.4	-1704.6	-1759.9
C1	20	14701.3	8518	16266.4	32705.5
C2	20	18150.4	10727.6	16768.3	30958.1
C3	20	18365.2	9989.8	16111.7	30488.5
C4	20	15792.9	9111.4	16810.4	33210.8
C5	20	16861.5	10003.5	15966.1	29769.1
C6	20	19138.3	10601.8	17176.6	32764.1
C7	20	-4914.8	-2594.6	-1788.9	-1716.7
C8	20	-3333.7	-1931	-1500.9	-1660.9
C9	20	-2493.1	-1448.6	-1085.1	-1208.9
C10	20	-4091.6	-2480	-1985.1	-2171.4
C11	20	-4153.7	-2457	-1930.6	-2089.4
C12	20	-3668	-2160.9	-1826.3	-2031.8
D1	20	3502.8	2262.5	12148.3	29332.5
D2	20	10092.8	6166.8	15038.6	31894.3
D3	20	20.8008	-126.5	11850.9	31462.8
D4	20	4297.2	2734.7	13268	31532.4
D5	20	10337.4	6357.3	15744.2	33602.8
D6	20	1126.5	659.801	11280.2	28745.7
D7	20	-2868.9	-1657.6	-1227	-1309
D8	20	-3385.1	-1972.6	-1535.1	-1716.5
D9	20	-3143.6	-1847.9	-1441.2	-1626.9
D10	20	-3268.5	-1837.5	-1367.8	-1471.8
D11	20	-2832.6	-1624.9	-1291.1	-1454
D12	20	-3092.5	-1803.8	-1452.9	-1556.3
E1	20	11911	7062.5	15037.4	31048.5
E2	20	18334.5	10842.5	17045	31381
E3	20	16457.6	9095.3	16389.5	32512.8
E4	20	12413.1	7417	15589.8	31739.2
E5	20	20520.8	12297.9	18810.2	34219.8
E6	20	17339.5	9723.1	16193.4	31014.9
E7	20	-2275.6	-1261.7	-815.602	-901.5
E8	20	-2375.4	-1359.8	-1044.7	-1200.1
E9	20	-2347.6	-1421.7	-1132.9	-1296
E10	20	-3650	-2165.5	-1712.8	-1728.8
E11	20	-2685.2	-1505.3	-1177.5	-1332.7
E12	20	-2951.8	-1690.5	-1373.5	-1507.9
F1	20	10847.4	6491.8	15057.9	31827.8
F2	20	18090	10814.9	17337.6	32390.5
F3	20	16941.2	9343.9	16513.9	32459.9
F4	20	13069.9	7770.3	16138.1	32673.1
F5	20	18292.7	11412	17910.7	32548.9
F6	20	16590.4	9310.5	15539.3	29793.3
F7	20	-3371.7	-1994.8	-1578.4	-1711.4
F8	20	-1956.7	-1184.2	-1002.1	-1209.6
F9	20	-3259.4	-1894.4	-1491.1	-1630.4
F10	20	-3512.6	-2101.9	-1673.1	-1746
F11	20	-3810	-2202.2	-1712.4	-1752.6
F12	20	-3127.8	-1765.8	-1404.7	-1412.9
G1	20	11833.5	7087.1	15500.3	32612.6
G2	20	16513.5	10052.2	16591.4	31351
G3	20	18415.5	10434.6	17985	34704.6
G4	20	13302.9	7832.2	16369.7	33437.8
G5	20	18013.3	10869	17252.7	31959
G6	20	18098.2	10215	17367	33516.3
G7	20	-3542.6	-2096.3	-1438.7	-1305
G8	20	-1742.3	-933.199	-696	-757.398
G9	20	-3578.5	-2099	-1635.4	-1679.9
G10	20	-3669.5	-2175.4	-1732.4	-1804.4
G11	20	-3550.3	-2030.3	-1493.4	-1416.6
G12	20	-2730.6	-1453.5	-1064.1	-996.301
H1	20	3943.2	2567.1	13087.8	31725.8
H2	20	8807.1	5467.8	14061.9	30633.8
H3	20	-137.102	-125.199	11810.6	31687.5
H4	20	3635.5	2329.6	13057.9	31821.4
H5	20	10603.6	6808.2	15816.4	32917.9
H6	20	293.898	158.102	11737.6	30936.3
H7	20	-3897.8	-2266	-1838.4	-2145.7
H8	20	-4180.9	-2455	-2021.5	-2246.7
H9	20	-1484.4	-679	-468.199	-700.602
H10	20	-4186.6	-2479.2	-2074	-2314
H11	20	-2539.8	-1430.8	-1226.7	-1415.2
H12	20	-2808.2	-1479.1	-1148.7	-1202.8
A1	21	15942.9	9483.1	16555.6	32180.6
A2	21	19143.5	11239.4	17682.8	32779.1
A3	21	23775.2	13247.1	16853.8	28861.1
A4	21	15106.6	8876.9	15566.7	30093
A5	21	18364.3	11154.1	17043	31142.7
A6	21	27486.8	15346.1	19366.3	32941.3
A7	21	-4030.2	-2390.9	-1928.5	-2320.3
A8	21	-3453.7	-1955.8	-1502.6	-1585.8
A9	21	-2580.6	-1392.2	-1033.4	-1158.4
A10	21	-4103.3	-2423.2	-2101	-2262.6
A11	21	-3691.4	-2202.1	-1812.6	-2043.7
A12	21	-3728	-2163.9	-1941.2	-1985.2
B1	21	14923.9	8804.5	16291.3	32244.6
B2	21	20496.8	12324.1	18259.9	32695.7
B3	21	26560	14634.7	18962.2	32555.7
B4	21	14534.6	8323.5	15189.8	29768
B5	21	21714.3	12887.3	19053.5	34254
B6	21	19327.4	10851.5	14858.5	26603.9
B7	21	-2707.2	-1467.9	-1021.8	-1111.6
B8	21	-2651.1	-1510.1	-1109	-1226.6
B9	21	-3645.3	-2117.8	-1620	-1751.2
B10	21	-3187.5	-1884.1	-1459.1	-1698
B11	21	-3734.6	-2118.7	-1538.6	-1680.6
B12	21	-3590.2	-2105.4	-1701.6	-1768.9
C1	21	15608.3	9012	16524.4	32746.5
C2	21	18486.4	10865.6	16892.3	31085.1
C3	21	26223.2	14233.8	18372.7	31584.5
C4	21	16579.9	9522.4	16913.4	33021.8
C5	21	16798.5	9939.5	15803.1	29443.1
C6	21	27041.3	14874.8	19480.6	33898.1
C7	21	-4934.8	-2606.6	-1799.9	-1730.7
C8	21	-3322.7	-1938	-1476.9	-1644.9
C9	21	-2510.1	-1459.6	-1077.1	-1211.9
C10	21	-4091.6	-2474	-1995.1	-2169.4
C11	21	-4150.7	-2451	-1933.6	-2086.4
C12	21	-3683	-2150.9	-1827.3	-2030.8
D1	21	3533.8	2288.5	12155.3	29351.5
D2	21	10045.8	6125.8	14952.6	31772.3
D3	21	20.8008	-138.5	11790.9	31320.8
D4	21	4200.2	2681.7	13139	31301.4
D5	21	10197.4	6277.3	15632.2	33333.8
D6	21	1138.5	679.801	11295.2	28779.7
D7	21	-2872.9	-1657.6	-1234	-1303
D8	21	-3387.1	-1979.6	-1539.1	-1691.5
D9	21	-3144.6	-1823.9	-1445.2	-1641.9
D10	21	-3275.5	-1826.5	-1366.8	-1486.8
D11	21	-2846.6	-1633.9	-1304.1	-1454
D12	21	-3103.5	-1807.8	-1455.9	-1565.3
E1	21	12012	7116.5	15056.4	31063.5
E2	21	18393.5	10843.5	17001	31286
E3	21	24097.6	13236.3	18634.5	33618.8
E4	21	12410.1	7407	15566.8	31661.2
E5	21	20621.8	12320.9	18811.2	34194.8
E6	21	25302.5	14063.1	18560.4	32203.9
E7	21	-2297.6	-1256.7	-820.602	-883.5
E8	21	-2367.4	-1343.8	-1021.7	-1179.1
E9	21	-2330.6	-1414.7	-1130.9	-1283
E10	21	-3623	-2143.5	-1701.8	-1749.8
E11	21	-2671.2	-1513.3	-1184.5	-1337.7
E12	21	-2955.8	-1680.5	-1385.5	-1504.9
F1	21	10958.4	6550.8	15046.9	31799.8
F2	21	18169	10850.9	17351.6	32352.5
F3	21	24997.2	13672.9	18855.9	33625.9
F4	21	13208.9	7824.3	16182.1	32745.1
F5	21	18472.7	11484	17972.7	32687.9
F6	21	24470.4	13566.5	17835.3	30987.3
F7	21	-3369.7	-1994.8	-1580.4	-1728.4
F8	21	-1935.7	-1160.2	-992.102	-1200.6
F9	21	-3237.4	-1894.4	-1479.1	-1619.4
F10	21	-3517.6	-2123.9	-1677.1	-1782
F11	21	-3801	-2202.2	-1725.4	-1758.6
F12	21	-3135.8	-1780.8	-1410.7	-1428.9
G1	21	11904.5	7098.1	15480.3	32548.6
[truncated: 13,079 more rows]

## Sheet: Amplification Data
Block Type	96well
Chemistry	SYBR_GREEN
Experiment File Name	C:\Applied Biosystems\StepOne Software v2.3\experiments\cib23 cDNA brain 01242020 ac.eds
Experiment Run End Time	Not Started
Instrument Type	steponeplus
Passive Reference	ROX
Well	Cycle	Target Name	Rn	ΔRn
A1	1	cib2	0.288844	-0.0174397
A1	2	cib2	0.305186	-0.0145639
A1	3	cib2	0.324694	-0.00852295
A1	4	cib2	0.343008	-0.00367508
A1	5	cib2	0.358316	-0.0018338
A1	6	cib2	0.37603	0.002414
A1	7	cib2	0.389547	0.00246424
A1	8	cib2	0.405739	0.00518915
A1	9	cib2	0.418963	0.00494685
A1	10	cib2	0.434316	0.00683318
A1	11	cib2	0.445908	0.00495799
A1	12	cib2	0.456686	0.00226981
A1	13	cib2	0.466749	-0.00113383
A1	14	cib2	0.476404	-0.00494549
A1	15	cib2	0.485852	-0.00896408
A1	16	cib2	0.495118	-0.0131648
A1	17	cib2	0.506766	-0.0149829
A1	18	cib2	0.518947	-0.0162695
A1	19	cib2	0.535401	-0.0132821
A1	20	cib2	0.561083	-0.00106593
A1	21	cib2	0.606876	0.0312597
A1	22	cib2	0.68775	0.0986677
A1	23	cib2	0.840552	0.238002
A1	24	cib2	1.12319	0.507173
A1	25	cib2	1.65193	1.02245
A1	26	cib2	2.59857	1.95562
A1	27	cib2	4.17021	3.5138
A1	28	cib2	6.32278	5.6529
A1	29	cib2	8.58129	7.89794
A1	30	cib2	10.4933	9.79651
A1	31	cib2	12.1905	11.4802
A1	32	cib2	13.6071	12.8834
A1	33	cib2	14.9197	14.1825
A1	34	cib2	16.0008	15.2501
A1	35	cib2	16.865	16.1009
A1	36	cib2	17.5998	16.8221
A1	37	cib2	18.2085	17.4174
A1	38	cib2	18.65	17.8454
A1	39	cib2	19.0496	18.2316
A1	40	cib2	19.4023	18.5708
A2	1	cib3	0.535117	-0.0571357
A2	2	cib3	0.555285	-0.0450485
A2	3	cib3	0.579382	-0.0290309
A2	4	cib3	0.600725	-0.0157687
A2	5	cib3	0.619228	-0.00534517
A2	6	cib3	0.634631	0.00197689
A2	7	cib3	0.648335	0.00760093
A2	8	cib3	0.658728	0.00991393
A2	9	cib3	0.667949	0.0110547
A2	10	cib3	0.674895	0.00992098
A2	11	cib3	0.68414	0.0110852
A2	12	cib3	0.68964	0.00850504
A2	13	cib3	0.698337	0.00912205
A2	14	cib3	0.70362	0.0063255
A2	15	cib3	0.709724	0.0043487
A2	16	cib3	0.717184	0.00372939
A2	17	cib3	0.723323	0.00178775
A2	18	cib3	0.728811	-0.000804296
A2	19	cib3	0.735047	-0.00264866
A2	20	cib3	0.73965	-0.00612512
A2	21	cib3	0.746273	-0.00758271
A2	22	cib3	0.752511	-0.00942516
A2	23	cib3	0.761376	-0.00864031
A2	24	cib3	0.771011	-0.0070856
A2	25	cib3	0.783489	-0.00268709
A2	26	cib3	0.799583	0.00532703
A2	27	cib3	0.825978	0.0236416
A2	28	cib3	0.868289	0.0578722
A2	29	cib3	0.941599	0.123102
A2	30	cib3	1.07238	0.245807
A2	31	cib3	1.31629	0.481633
A2	32	cib3	1.75754	0.914798
A2	33	cib3	2.56579	1.71497
A2	34	cib3	3.94188	3.08298
A2	35	cib3	5.97893	5.11195
A2	36	cib3	8.16023	7.28517
A2	37	cib3	9.99576	9.11262
A2	38	cib3	11.197	10.3058
A2	39	cib3	12.1614	11.2621
A2	40	cib3	12.9612	12.0538
A3	1	hprt	0.114205	-0.0260124
A3	2	hprt	0.137141	-0.0145213
A3	3	hprt	0.154935	-0.00817224
A3	4	hprt	0.173381	-0.00117229
A3	5	hprt	0.187914	0.00191617
A3	6	hprt	0.20187	0.00442678
A3	7	hprt	0.214263	0.00537476
A3	8	hprt	0.223783	0.00344944
A3	9	hprt	0.233458	0.00167913
A3	10	hprt	0.243226	1.19462e-06
A3	11	hprt	0.251913	-0.0027568
A3	12	hprt	0.261369	-0.00474615
A3	13	hprt	0.271128	-0.00643188
A3	14	hprt	0.284812	-0.00419371
A3	15	hprt	0.298479	-0.00197229
A3	16	hprt	0.320501	0.00860538
A3	17	hprt	0.354679	0.0313382
A3	18	hprt	0.415577	0.0807901
A3	19	hprt	0.527877	0.181645
A3	20	hprt	0.736439	0.378762
A3	21	hprt	1.13012	0.760995
A3	22	hprt	1.84038	1.45981
A3	23	hprt	2.9844	2.59239
A3	24	hprt	4.44894	4.04548
A3	25	hprt	5.97667	5.56177
A3	26	hprt	7.32355	6.8972
A3	27	hprt	8.59093	8.15314
A3	28	hprt	9.83048	9.38124
A3	29	hprt	11.0151	10.5544
A3	30	hprt	12.0884	11.6162
A3	31	hprt	13.1013	12.6178
A3	32	hprt	13.8949	13.3998
A3	33	hprt	14.6391	14.1326
A3	34	hprt	15.2933	14.7754
A3	35	hprt	15.8447	15.3154
A3	36	hprt	16.2744	15.7336
A3	37	hprt	16.7092	16.1569
A3	38	hprt	17.0706	16.5069
A3	39	hprt	17.3823	16.8071
A3	40	hprt	17.6559	17.0693
A4	1	cib22	0.302306	-0.0396669
A4	2	cib22	0.326611	-0.0254241
A4	3	cib22	0.348939	-0.013157
A4	4	cib22	0.368114	-0.00404361
A4	5	cib22	0.38485	0.00263086
A4	6	cib22	0.396916	0.00463571
A4	7	cib22	0.407478	0.00513541
A4	8	cib22	0.417822	0.00541804
A4	9	cib22	0.427791	0.00532587
A4	10	cib22	0.434753	0.0022262
A4	11	cib22	0.444958	0.00236941
A4	12	cib22	0.453948	0.00129772
A4	13	cib22	0.461597	-0.00111477
A4	14	cib22	0.470492	-0.00228047
A4	15	cib22	0.477768	-0.00506615
A4	16	cib22	0.489519	-0.00337721
A4	17	cib22	0.49831	-0.00464785
A4	18	cib22	0.510733	-0.00228592
A4	19	cib22	0.527856	0.00477566
A4	20	cib22	0.552222	0.0190803
A4	21	cib22	0.59899	0.0557868
A4	22	cib22	0.683659	0.130394
A4	23	cib22	0.834404	0.271077
A4	24	cib22	1.118	0.54461
A4	25	cib22	1.64712	1.06367
A4	26	cib22	2.60452	2.01101
A4	27	cib22	4.19946	3.59589
A4	28	cib22	6.42563	5.812
A4	29	cib22	8.77383	8.15013
A4	30	cib22	10.7978	10.1641
A4	31	cib22	12.5556	11.9118
A4	32	cib22	13.9974	13.3435
A4	33	cib22	15.3485	14.6846
A4	34	cib22	16.5136	15.8396
A4	35	cib22	17.4721	16.788
A4	36	cib22	18.1938	17.4997
A4	37	cib22	18.8469	18.1427
A4	38	cib22	19.3241	18.6098
A4	39	cib22	19.7292	19.0049
A4	40	cib22	20.1543	19.42
A5	1	cib32	0.552104	-0.0575921
A5	2	cib32	0.579082	-0.0386904
A5	3	cib32	0.604107	-0.0217416
A5	4	cib32	0.624865	-0.00906008
A5	5	cib32	0.641481	-0.000520599
A5	6	cib32	0.652308	0.0022293
A5	7	cib32	0.662808	0.00465304
A5	8	cib32	0.67227	0.00603895
A5	9	cib32	0.680922	0.00661382
A5	10	cib32	0.689352	0.00696719
A5	11	cib32	0.697354	0.00689278
A5	12	cib32	0.703881	0.0053437
A5	13	cib32	0.711106	0.0044924
A5	14	cib32	0.719214	0.00452338
A5	15	cib32	0.725679	0.00291183
A5	16	cib32	0.732913	0.00206989
A5	17	cib32	0.739451	0.000530521
A5	18	cib32	0.745793	-0.0012034
A5	19	cib32	0.753527	-0.00154573
A5	20	cib32	0.759819	-0.00333049
A5	21	cib32	0.766272	-0.00495456
A5	22	cib32	0.773554	-0.00574881
A5	23	cib32	0.782218	-0.00516155
A5	24	cib32	0.792169	-0.00328623
A5	25	cib32	0.806098	0.00256568
A5	26	cib32	0.823798	0.0121894
A5	27	cib32	0.852426	0.0327413
A5	28	cib32	0.897782	0.07002
A5	29	cib32	0.977007	0.141169
A5	30	cib32	1.12011	0.276192
A5	31	cib32	1.38296	0.530973
A5	32	cib32	1.85996	0.999891
A5	33	cib32	2.72568	1.85754
A5	34	cib32	4.19256	3.31634
A5	35	cib32	6.28937	5.40507
A5	36	cib32	8.48176	7.58939
A5	37	cib32	10.2794	9.37897
A5	38	cib32	11.4794	10.5709
A5	39	cib32	12.4201	11.5035
A5	40	cib32	13.1403	12.2156
A6	1	hprt2	0.14075	-0.0281594
A6	2	hprt2	0.163426	-0.0168193
A6	3	hprt2	0.185576	-0.00600502
A6	4	hprt2	0.203958	0.00104112
A6	5	hprt2	0.216235	0.00198192
A6	6	hprt2	0.228167	0.00257825
A6	7	hprt2	0.239276	0.00235172
A6	8	hprt2	0.250615	0.00235479
A6	9	hprt2	0.25991	0.000314156
A6	10	hprt2	0.269801	-0.00112996
A6	11	hprt2	0.27878	-0.00348697
A6	12	hprt2	0.288499	-0.00510352
A6	13	hprt2	0.299831	-0.00510779
A6	14	hprt2	0.310799	-0.00547512
A6	15	hprt2	0.326821	-0.00078874
A6	16	hprt2	0.348944	0.00999859
A6	17	hprt2	0.384194	0.0339123
A6	18	hprt2	0.443433	0.0818156
A6	19	hprt2	0.555813	0.18286
A6	20	hprt2	0.763901	0.379613
A6	21	hprt2	1.15611	0.760488
A6	22	hprt2	1.86681	1.45985
A6	23	hprt2	3.03494	2.61665
A6	24	hprt2	4.57585	4.14622
A6	25	hprt2	6.24742	5.80645
A6	26	hprt2	7.74857	7.29627
A6	27	hprt2	9.12207	8.65843
A6	28	hprt2	10.4843	10.0093
A6	29	hprt2	11.7629	11.2766
A6	30	hprt2	12.9996	12.5019
A6	31	hprt2	14.11	13.601
A6	32	hprt2	15.0533	14.5329
A6	33	hprt2	15.8194	15.2878
A6	34	hprt2	16.5312	15.9882
A6	35	hprt2	17.1953	16.6409
A6	36	hprt2	17.6617	17.096
A6	37	hprt2	18.2039	17.6269
A6	38	hprt2	18.5513	17.963
A6	39	hprt2	18.8713	18.2716
A6	40	hprt2	19.2609	18.6499
A7	1
A7	2
A7	3
A7	4
A7	5
A7	6
A7	7
A7	8
A7	9
A7	10
A7	11
A7	12
A7	13
A7	14
A7	15
A7	16
A7	17
A7	18
A7	19
A7	20
A7	21
A7	22
A7	23
A7	24
A7	25
A7	26
A7	27
A7	28
A7	29
A7	30
A7	31
A7	32
A7	33
A7	34
A7	35
A7	36
A7	37
A7	38
A7	39
A7	40
A8	1
A8	2
A8	3
A8	4
A8	5
A8	6
A8	7
A8	8
A8	9
A8	10
A8	11
A8	12
A8	13
A8	14
A8	15
A8	16
A8	17
A8	18
A8	19
A8	20
A8	21
A8	22
A8	23
A8	24
A8	25
A8	26
A8	27
A8	28
A8	29
A8	30
A8	31
A8	32
A8	33
A8	34
A8	35
A8	36
A8	37
A8	38
A8	39
A8	40
A9	1
A9	2
A9	3
A9	4
A9	5
A9	6
A9	7
A9	8
A9	9
A9	10
A9	11
A9	12
A9	13
A9	14
A9	15
A9	16
A9	17
A9	18
A9	19
A9	20
A9	21
A9	22
A9	23
A9	24
A9	25
A9	26
A9	27
A9	28
A9	29
A9	30
A9	31
A9	32
A9	33
A9	34
A9	35
A9	36
A9	37
A9	38
A9	39
A9	40
A10	1
A10	2
A10	3
A10	4
A10	5
A10	6
A10	7
A10	8
A10	9
A10	10
A10	11
A10	12
A10	13
A10	14
A10	15
A10	16
A10	17
A10	18
A10	19
A10	20
A10	21
A10	22
A10	23
A10	24
A10	25
A10	26
A10	27
A10	28
A10	29
A10	30
A10	31
A10	32
A10	33
A10	34
A10	35
A10	36
A10	37
A10	38
A10	39
A10	40
A11	1
A11	2
A11	3
A11	4
A11	5
A11	6
A11	7
A11	8
A11	9
A11	10
A11	11
A11	12
A11	13
A11	14
A11	15
A11	16
A11	17
A11	18
A11	19
A11	20
A11	21
A11	22
A11	23
A11	24
A11	25
A11	26
A11	27
A11	28
A11	29
A11	30
A11	31
A11	32
A11	33
A11	34
A11	35
A11	36
A11	37
A11	38
A11	39
A11	40
A12	1
A12	2
A12	3
A12	4
A12	5
A12	6
A12	7
A12	8
A12	9
A12	10
A12	11
A12	12
A12	13
A12	14
A12	15
A12	16
A12	17
A12	18
A12	19
A12	20
A12	21
A12	22
A12	23
A12	24
A12	25
A12	26
A12	27
A12	28
A12	29
A12	30
A12	31
A12	32
A12	33
A12	34
A12	35
A12	36
A12	37
A12	38
A12	39
A12	40
B1	1	cib2	0.275144	-0.045159
B1	2	cib2	0.30225	-0.0271553
B1	3	cib2	0.324804	-0.0137045
B1	4	cib2	0.344165	-0.00344602
B1	5	cib2	0.358346	0.00163256
B1	6	cib2	0.369654	0.00383874
B1	7	cib2	0.380031	0.00511266
B1	8	cib2	0.390476	0.00645558
B1	9	cib2	0.398459	0.00533578
B1	10	cib2	0.405822	0.00359616
B1	11	cib2	0.414556	0.00322762
B1	12	cib2	0.420839	0.000408346
B1	13	cib2	0.429077	-0.000456342
B1	14	cib2	0.436199	-0.00243617
B1	15	cib2	0.442787	-0.00495126
B1	16	cib2	0.452227	-0.00461318
B1	17	cib2	0.460227	-0.00571587
B1	18	cib2	0.471182	-0.00386354
B1	19	cib2	0.486815	0.00266695
B1	20	cib2	0.511328	0.0180775
B1	21	cib2	0.553647	0.051294
B1	22	cib2	0.62944	0.117984
B1	23	cib2	0.769922	0.249364
B1	24	cib2	1.02953	0.499873
B1	25	cib2	1.51867	0.979904
B1	26	cib2	2.39753	1.84966
B1	27	cib2	3.86032	3.30335
B1	28	cib2	5.89519	5.32912
B1	29	cib2	8.04061	7.46544
B1	30	cib2	9.94202	9.35774
B1	31	cib2	11.6124	11.0191
B1	32	cib2	12.9902	12.3877
B1	33	cib2	14.306	13.6944
B1	34	cib2	15.409	14.7883
B1	35	cib2	16.3167	15.6869
B1	36	cib2	16.9913	16.3524
B1	37	cib2	17.6256	16.9776
B1	38	cib2	18.1333	17.4762
B1	39	cib2	18.5427	17.8765
B1	40	cib2	18.8974	18.2221
B2	1	cib3	0.613033	-0.0721056
B2	2	cib3	0.677124	-0.0150792
B2	3	cib3	0.689908	-0.00935857
B2	4	cib3	0.702598	-0.00373322
B2	5	cib3	0.710486	-0.00290943
B2	6	cib3	0.720792	0.000332448
B2	7	cib3	0.729428	0.00190433
B2	8	cib3	0.737338	0.00275022
B2	9	cib3	0.745094	0.00344216
B2	10	cib3	0.75426	0.0055438
B2	11	cib3	0.760178	0.00439819
B2	12	cib3	0.76566	0.00281639
B2	13	cib3	0.773818	0.00390964
B2	14	cib3	0.779095	0.0021225
B2	15	cib3	0.785451	0.00141468
B2	16	cib3	0.793235	0.00213433
B2	17	cib3	0.795638	-0.00252659
B2	18	cib3	0.802556	-0.00267299
B2	19	cib3	0.810601	-0.00169132
B2	20	cib3	0.815023	-0.00433378
B2	21	cib3	0.822878	-0.00354278
B2	22	cib3	0.826237	-0.00724818
B2	23	cib3	0.837548	-0.00300107
B2	24	cib3	0.847638	2.49279e-05
B2	25	cib3	0.863703	0.00902599
B2	26	cib3	0.889886	0.0281448
B2	27	cib3	0.926317	0.0575115
B2	28	cib3	0.999807	0.123938
B2	29	cib3	1.12333	0.240392
B2	30	cib3	1.35996	0.469961
B2	31	cib3	1.78731	0.890252
B2	32	cib3	2.55955	1.65542
B2	33	cib3	3.84111	2.92992
B2	34	cib3	5.65087	4.73262
B2	35	cib3	7.53973	6.61441
B2	36	cib3	8.9974	8.06502
B2	37	cib3	10.1217	9.1823
B2	38	cib3	10.8676	9.9211
B2	39	cib3	11.4572	10.5036
B2	40	cib3	11.8989	10.9382
B3	1	hprt	0.168188	-0.0224299
B3	2	hprt	0.192063	-0.0088961
B3	3	hprt	0.207527	-0.00377212
B3	4	hprt	0.220954	-0.000685299
B3	5	hprt	0.233082	0.00110232
B3	6	hprt	0.24482	0.00249955
B3	7	hprt	0.254456	0.00179499
B3	8	hprt	0.265302	0.00230065
B3	9	hprt	0.273866	0.000524817
B3	10	hprt	0.282868	-0.000814233
B3	11	hprt	0.292617	-0.00140563
B3	12	hprt	0.302818	-0.00154505
B3	13	hprt	0.311719	-0.00298423
B3	14	hprt	0.324724	-0.000319401
B3	15	hprt	0.337332	0.00194817
B3	16	hprt	0.358174	0.01245
B3	17	hprt	0.391864	0.0357994
B3	18	hprt	0.447443	0.0810376
B3	19	hprt	0.55288	0.176134
B3	20	hprt	0.74666	0.359574
B3	21	hprt	1.11222	0.714791
B3	22	hprt	1.78042	1.37265
B3	23	hprt	2.8624	2.44429
B3	24	hprt	4.29141	3.86296
B3	25	hprt	5.84647	5.40769
B3	26	hprt	7.26711	6.81798
B3	27	hprt	8.5947	8.13523
B3	28	hprt	9.92074	9.45093
B3	29	hprt	11.2264	10.7463
B3	30	hprt	12.3782	11.8877
B3	31	hprt	13.5548	13.0539
B3	32	hprt	14.418	13.9068
B3	33	hprt	15.3119	14.7904
B3	34	hprt	16.0677	15.5359
B3	35	hprt	16.6753	16.1331
B3	36	hprt	17.2413	16.6888
B3	37	hprt	17.7267	17.1638
B3	38	hprt	18.0958	17.5226
B3	39	hprt	18.5341	17.9505
B3	40	hprt	18.8542	18.2603
B4	1	cib22	0.296512	-0.027115
B4	2	cib22	0.321426	-0.0119743
B4	3	cib22	0.337306	-0.00586796
B4	4	cib22	0.349669	-0.00327779
B4	5	cib22	0.36256	-0.000160306
B4	6	cib22	0.373587	0.00109278
B4	7	cib22	0.38527	0.00300276
B4	8	cib22	0.396515	0.00447418
B4	9	cib22	0.405328	0.00351387
B4	10	cib22	0.413122	0.00153468
B4	11	cib22	0.422441	0.00107983
B4	12	cib22	0.434476	0.0033419
B4	13	cib22	0.439936	-0.000971528
B4	14	cib22	0.449361	-0.00131952
B4	15	cib22	0.45707	-0.00338403
B4	16	cib22	0.467169	-0.00305887
B4	17	cib22	0.476756	-0.00324512
B4	18	cib22	0.488326	-0.00144856
B4	19	cib22	0.503135	0.003587
B4	20	cib22	0.526381	0.01706
B4	21	cib22	0.572347	0.0532524
B4	22	cib22	0.649584	0.120716
B4	23	cib22	0.792084	0.253443
B4	24	cib22	1.05288	0.504466
B4	25	cib22	1.54627	0.988081
B4	26	cib22	2.43876	1.8708
B4	27	cib22	3.97353	3.3958
B4	28	cib22	6.21481	5.6273
B4	29	cib22	8.70812	8.11084
B4	30	cib22	10.9706	10.3635
B4	31	cib22	12.989	12.3722
B4	32	cib22	14.7393	14.1127
B4	33	cib22	16.3023	15.666
B4	34	cib22	17.7251	17.0789
B4	35	cib22	18.7355	18.0796
B4	36	cib22	19.7542	19.0885
B4	37	cib22	20.8168	20.1414
B4	38	cib22	21.3988	20.7136
B4	39	cib22	21.9265	21.2314
B4	40	cib22	22.1948	21.49
B5	1	cib32	0.598232	-0.090271
B5	2	cib32	0.678148	-0.0178799
B5	3	cib32	0.695726	-0.00782828
B5	4	cib32	0.706375	-0.00470423
B5	5	cib32	0.716039	-0.00256623
B5	6	cib32	0.725268	-0.000863216
B5	7	cib32	0.734636	0.000979508
B5	8	cib32	0.743109	0.00192667
B5	9	cib32	0.752518	0.00380975
B5	10	cib32	0.760016	0.00378178
B5	11	cib32	0.767666	0.00390616
B5	12	cib32	0.77577	0.00448509
B5	13	cib32	0.782323	0.00351233
B5	14	cib32	0.788118	0.00178086
B5	15	cib32	0.798498	0.0046355
B5	16	cib32	0.803014	0.00162599
B5	17	cib32	0.809617	0.000702756
B5	18	cib32	0.814622	-0.00181722
B5	19	cib32	0.822087	-0.00187803
B5	20	cib32	0.827983	-0.00350829
B5	21	cib32	0.833818	-0.00519857
B5	22	cib32	0.84376	-0.00278233
B5	23	cib32	0.852498	-0.0015701
B5	24	cib32	0.865589	0.00399523
B5	25	cib32	0.882488	0.0133685
B5	26	cib32	0.910519	0.0338743
B5	27	cib32	0.95559	0.0714188
B5	28	cib32	1.03363	0.141932
B5	29	cib32	1.17513	0.275905
B5	30	cib32	1.43801	0.531259
B5	31	cib32	1.92928	1.01501
B5	32	cib32	2.79244	1.87064
B5	33	cib32	4.26346	3.33413
B5	34	cib32	6.36432	5.42747
B5	35	cib32	8.61767	7.6733
B5	36	cib32	10.3553	9.4034
B5	37	cib32	11.6439	10.6844
B5	38	cib32	12.5303	11.5633
B5	39	cib32	13.2474	12.2729
B5	40	cib32	13.6916	12.7096
B6	1	hprt2	0.106204	0.000502366
B6	2	hprt2	0.115115	0.0013266
B6	3	hprt2	0.121256	-0.000619159
B6	4	hprt2	0.12958	-0.00038237
B6	5	hprt2	0.139199	0.00115011
B6	6	hprt2	0.145218	-0.000917959
B6	7	hprt2	0.15468	0.000456913
B6	8	hprt2	0.163236	0.000925154
B6	9	hprt2	0.170569	0.000171127
B6	10	hprt2	0.178206	-0.000278081
B6	11	hprt2	0.186148	-0.000423872
B6	12	hprt2	0.195147	0.000487976
B6	13	hprt2	0.202176	-0.00056984
B6	14	hprt2	0.211905	0.00107212
B6	15	hprt2	0.225045	0.00612564
B6	16	hprt2	0.244082	0.0170754
B6	17	hprt2	0.276152	0.0410585
B6	18	hprt2	0.32927	0.0860891
B6	19	hprt2	0.428362	0.177095
B6	20	hprt2	0.617723	0.358368
B6	21	hprt2	0.971307	0.703865
B6	22	hprt2	1.60865	1.33312
B6	23	hprt2	2.65556	2.37194
B6	24	hprt2	4.03534	3.74363
B6	25	hprt2	5.53268	5.23289
B6	26	hprt2	6.85452	6.54664
B6	27	hprt2	8.04651	7.73055
B6	28	hprt2	9.24304	8.91899
B6	29	hprt2	10.3639	10.0318
B6	30	hprt2	11.423	11.0827
B6	31	hprt2	12.3967	12.0484
B6	32	hprt2	13.1555	12.7991
B6	33	hprt2	13.9148	13.5503
B6	34	hprt2	14.5653	14.1927
B6	35	hprt2	15.071	14.6904
B6	36	hprt2	15.459	15.0703
B6	37	hprt2	15.9262	15.5294
B6	38	hprt2	16.238	15.8331
B6	39	hprt2	16.5715	16.1585
B6	40	hprt2	16.7639	16.3428
B7	1
B7	2
B7	3
B7	4
B7	5
B7	6
B7	7
B7	8
B7	9
B7	10
B7	11
B7	12
B7	13
B7	14
B7	15
B7	16
B7	17
B7	18
B7	19
B7	20
B7	21
B7	22
B7	23
B7	24
B7	25
B7	26
B7	27
B7	28
B7	29
B7	30
B7	31
B7	32
B7	33
B7	34
B7	35
B7	36
B7	37
B7	38
B7	39
B7	40
B8	1
B8	2
B8	3
B8	4
B8	5
B8	6
B8	7
B8	8
B8	9
B8	10
B8	11
B8	12
B8	13
B8	14
B8	15
B8	16
B8	17
B8	18
B8	19
B8	20
B8	21
B8	22
B8	23
B8	24
B8	25
B8	26
B8	27
B8	28
B8	29
B8	30
B8	31
B8	32
B8	33
B8	34
B8	35
B8	36
B8	37
B8	38
B8	39
B8	40
B9	1
B9	2
B9	3
B9	4
B9	5
B9	6
B9	7
B9	8
B9	9
B9	10
B9	11
B9	12
B9	13
B9	14
B9	15
B9	16
B9	17
B9	18
B9	19
B9	20
B9	21
B9	22
B9	23
B9	24
B9	25
B9	26
B9	27
B9	28
B9	29
B9	30
B9	31
B9	32
B9	33
B9	34
B9	35
B9	36
B9	37
B9	38
B9	39
B9	40
B10	1
B10	2
B10	3
B10	4
B10	5
B10	6
B10	7
B10	8
B10	9
B10	10
B10	11
B10	12
B10	13
B10	14
B10	15
B10	16
B10	17
B10	18
B10	19
B10	20
B10	21
B10	22
B10	23
B10	24
B10	25
B10	26
B10	27
B10	28
B10	29
B10	30
B10	31
B10	32
B10	33
B10	34
B10	35
B10	36
B10	37
B10	38
B10	39
B10	40
B11	1
B11	2
B11	3
B11	4
B11	5
B11	6
B11	7
B11	8
B11	9
B11	10
B11	11
B11	12
B11	13
B11	14
B11	15
B11	16
B11	17
B11	18
B11	19
B11	20
B11	21
B11	22
B11	23
B11	24
B11	25
B11	26
B11	27
B11	28
B11	29
B11	30
B11	31
B11	32
B11	33
B11	34
B11	35
B11	36
B11	37
B11	38
B11	39
B11	40
B12	1
B12	2
B12	3
B12	4
B12	5
B12	6
B12	7
B12	8
B12	9
B12	10
B12	11
B12	12
B12	13
B12	14
B12	15
B12	16
B12	17
B12	18
B12	19
B12	20
B12	21
B12	22
B12	23
B12	24
B12	25
B12	26
B12	27
B12	28
B12	29
B12	30
B12	31
B12	32
B12	33
B12	34
B12	35
B12	36
B12	37
B12	38
B12	39
B12	40
C1	1	cib2	0.296651	-0.0420332
C1	2	cib2	0.323092	-0.0246298
C1	3	cib2	0.345245	-0.011515
C1	4	cib2	0.362295	-0.00350297
C1	5	cib2	0.376943	0.00210713
C1	6	cib2	0.387503	0.00362966
C1	7	cib2	0.396229	0.00331854
C1	8	cib2	0.40711	0.0051613
C1	9	cib2	0.414053	0.00306673
C1	10	cib2	0.424255	0.00423122
C1	11	cib2	0.43229	0.00322785
C1	12	cib2	0.439599	0.00149925
C1	13	cib2	0.44689	-0.000246934
C1	14	cib2	0.454795	-0.00138047
C1	15	cib2	0.460822	-0.00439102
C1	16	cib2	0.469045	-0.00520532
C1	17	cib2	0.478082	-0.00520598
C1	18	cib2	0.490026	-0.00229964
C1	19	cib2	0.504652	0.00328775
C1	20	cib2	0.52933	0.018929
C1	21	cib2	0.571213	0.0517736
C1	22	cib2	0.644837	0.11636
C1	23	cib2	0.784655	0.247141
C1	24	cib2	1.04212	0.495571
C1	25	cib2	1.52582	0.970233
C1	26	cib2	2.39276	1.82813
C1	27	cib2	3.86862	3.29496
C1	28	cib2	5.96053	5.37783
C1	29	cib2	8.27542	7.68368
C1	30	cib2	10.3377	9.73693
C1	31	cib2	12.1668	11.557
C1	32	cib2	13.7646	13.1457
C1	33	cib2	15.2647	14.6368
C1	34	cib2	16.5405	15.9035
C1	35	cib2	17.5992	16.9532
C1	36	cib2	18.467	17.812
C1	37	cib2	19.2115	18.5475
C1	38	cib2	19.7658	19.0928
C1	39	cib2	20.3187	19.6366
C1	40	cib2	20.6968	20.0057
C2	1	cib3	0.559593	-0.0637383
C2	2	cib3	0.615914	-0.0144835
C2	3	cib3	0.627186	-0.0102786
C2	4	cib3	0.64108	-0.00345077
C2	5	cib3	0.647676	-0.00392165
C2	6	cib3	0.659732	0.00106744
C2	7	cib3	0.665593	-0.000137948
C2	8	cib3	0.67827	0.00547287
C2	9	cib3	0.683176	0.00331208
C2	10	cib3	0.690491	0.0035601
C2	11	cib3	0.697983	0.00398502
C2	12	cib3	0.702789	0.00172528
C2	13	cib3	0.714642	0.00651135
C2	14	cib3	0.716734	0.00153669
C2	15	cib3	0.727115	0.00485046
C2	16	cib3	0.729105	-0.000226363
C2	17	cib3	0.738353	0.0019551
C2	18	cib3	0.740416	-0.00304811
C2	19	cib3	0.749766	-0.000765017
C2	20	cib3	0.751572	-0.00602584
C2	21	cib3	0.764012	-0.000652608
C2	22	cib3	0.765766	-0.00596517
C2	23	cib3	0.779293	0.000495671
C2	24	cib3	0.785702	-0.000162188
C2	25	cib3	0.803727	0.0107957
C2	26	cib3	0.830542	0.0305441
C2	27	cib3	0.871975	0.0649103
C2	28	cib3	0.94791	0.133779
C2	29	cib3	1.07503	0.25383
C2	30	cib3	1.32497	0.496705
C2	31	cib3	1.7666	0.931273
C2	32	cib3	2.56439	1.72199
C2	33	cib3	3.89766	3.0482
C2	34	cib3	5.8006	4.94407
C2	35	cib3	7.85673	6.99313
C2	36	cib3	9.40278	8.53212
C2	37	cib3	10.6419	9.76421
C2	38	cib3	11.4442	10.5594
C2	39	cib3	12.1259	11.234
C2	40	cib3	12.7685	11.8696
C3	1	hprt	0.161298	-0.0183978
C3	2	hprt	0.18335	-0.00685447
C3	3	hprt	0.19649	-0.00422203
C3	4	hprt	0.21249	0.00126886
C3	5	hprt	0.22382	0.00209022
C3	6	hprt	0.232976	0.00073774
C3	7	hprt	0.243048	0.000301575
C3	8	hprt	0.255462	0.00220672
C3	9	hprt	0.264678	0.000914383
C3	10	hprt	0.273281	-0.000991112
C3	11	hprt	0.282474	-0.00230637
C3	12	hprt	0.291884	-0.00340494
C3	13	hprt	0.302417	-0.0033804
C3	14	hprt	0.31416	-0.0021459
C3	15	hprt	0.329174	0.00235912
C3	16	hprt	0.349963	0.0126402
C3	17	hprt	0.384149	0.0363175
C3	18	hprt	0.441042	0.082702
C3	19	hprt	0.549913	0.181064
C3	20	hprt	0.750581	0.371224
C3	21	hprt	1.13276	0.742899
C3	22	hprt	1.8234	1.42302
C3	23	hprt	2.94072	2.52984
C3	24	hprt	4.40112	3.97973
C3	25	hprt	5.95379	5.52189
C3	26	hprt	7.36893	6.92652
C3	27	hprt	8.72097	8.26805
C3	28	hprt	10.057	9.59357
C3	29	hprt	11.3483	10.8744
C3	30	hprt	12.5501	12.0656
C3	31	hprt	13.7614	13.2664
C3	32	hprt	14.6461	14.1406
C3	33	hprt	15.5379	15.0219
C3	34	hprt	16.307	15.7805
C3	35	hprt	17.0032	16.4663
C3	36	hprt	17.5218	16.9743
C3	37	hprt	18.057	17.499
C3	38	hprt	18.4814	17.9129
C3	39	hprt	18.858	18.279
C3	40	hprt	19.2085	18.619
C4	1	cib22	0.309806	-0.0489276
C4	2	cib22	0.355721	-0.012174
C4	3	cib22	0.369794	-0.00726311
C4	4	cib22	0.384943	-0.00127543
C4	5	cib22	0.395194	-0.000185158
C4	6	cib22	0.405581	0.00104033
C4	7	cib22	0.416324	0.00262216
C4	8	cib22	0.426614	0.00375075
C4	9	cib22	0.435464	0.00343969
C4	10	cib22	0.443606	0.00242001
C4	11	cib22	0.452431	0.00208406
C4	12	cib22	0.460869	0.00136101
C4	13	cib22	0.469114	0.000444392
C4	14	cib22	0.474997	-0.00283415
C4	15	cib22	0.484619	-0.00237342
C4	16	cib22	0.492923	-0.00323112
C4	17	cib22	0.501844	-0.00347129
C4	18	cib22	0.513144	-0.00133186
C4	19	cib22	0.528649	0.00501143
C4	20	cib22	0.55377	0.0209712
C4	21	cib22	0.594572	0.0526121
C4	22	cib22	0.669106	0.117984
C4	23	cib22	0.802699	0.242416
C4	24	cib22	1.05198	0.482536
C4	25	cib22	1.51916	0.940557
C4	26	cib22	2.37133	1.78356
C4	27	cib22	3.81836	3.22144
C4	28	cib22	5.91456	5.30847
C4	29	cib22	8.27386	7.6586
C4	30	cib22	10.3624	9.73797
C4	31	cib22	12.2507	11.6171
C4	32	cib22	13.7433	13.1006
C4	33	cib22	15.1691	14.5172
C4	34	cib22	16.4923	15.8312
C4	35	cib22	17.5014	16.8312
C4	36	cib22	18.3252	17.6458
C4	37	cib22	19.0274	18.3389
C4	38	cib22	19.5827	18.885
C4	39	cib22	19.9832	19.2763
C4	40	cib22	20.4115	19.6954
C5	1	cib32	0.51882	-0.0596865
C5	2	cib32	0.57662	-0.00958665
C5	3	cib32	0.584915	-0.00899163
C5	4	cib32	0.598676	-0.00292979
C5	5	cib32	0.607068	-0.00223768
C5	6	cib32	0.616946	-6.0033e-05
C5	7	cib32	0.624301	-0.000404382
C5	8	cib32	0.637018	0.00461211
C5	9	cib32	0.64295	0.00284482
C5	10	cib32	0.650934	0.0031293
C5	11	cib32	0.65933	0.00382535
C5	12	cib32	0.666099	0.00289402
C5	13	cib32	0.673737	0.0028319
C5	14	cib32	0.683053	0.004448
C5	15	cib32	0.687013	0.000708814
C5	16	cib32	0.695565	0.00156091
C5	17	cib32	0.702324	0.000619501
C5	18	cib32	0.708564	-0.000840289
C5	19	cib32	0.714508	-0.00259602
C5	20	cib32	0.722391	-0.00241322
C5	21	cib32	0.728505	-0.00399901
C5	22	cib32	0.737201	-0.00300268
C5	23	cib32	0.745722	-0.00218157
C5	24	cib32	0.758111	0.00250811
C5	25	cib32	0.772243	0.00893967
C5	26	cib32	0.796192	0.025189
C5	27	cib32	0.834026	0.055323
C5	28	cib32	0.896971	0.110568
C5	29	cib32	1.01204	0.217938
C5	30	cib32	1.22039	0.418584
C5	31	cib32	1.60674	0.797235
C5	32	cib32	2.31009	1.49289
C5	33	cib32	3.54337	2.71847
C5	34	cib32	5.47059	4.63799
C5	35	cib32	7.80163	6.96133
C5	36	cib32	9.81862	8.97062
C5	37	cib32	11.2716	10.4159
C5	38	cib32	12.2341	11.3707
C5	39	cib32	12.8918	12.0207
C5	40	cib32	13.4657	12.5869
C6	1	hprt2	0.168382	-0.019245
C6	2	hprt2	0.190178	-0.0077409
C6	3	hprt2	0.204557	-0.00365289
C6	4	hprt2	0.218114	-0.000386745
C6	5	hprt2	0.229854	0.00106154
C6	6	hprt2	0.240952	0.00186907
C6	7	hprt2	0.250799	0.00142474
C6	8	hprt2	0.261642	0.00197589
C6	9	hprt2	0.271246	0.00128862
C6	10	hprt2	0.280266	1.80766e-05
C6	11	hprt2	0.288935	-0.00160443
C6	12	hprt2	0.298837	-0.00199386
C6	13	hprt2	0.307608	-0.00351373
C6	14	hprt2	0.319113	-0.00230054
C6	15	hprt2	0.334695	0.00299103
C6	16	hprt2	0.354538	0.0125429
C6	17	hprt2	0.386597	0.03431
C6	18	hprt2	0.441472	0.0788943
C6	19	hprt2	0.541605	0.168736
C6	20	hprt2	0.732098	0.348938
C6	21	hprt2	1.08728	0.693826
C6	22	hprt2	1.73617	1.33243
C6	23	hprt2	2.81132	2.39728
C6	24	hprt2	4.25869	3.83436
C6	25	hprt2	5.85591	5.42129
C6	26	hprt2	7.32432	6.87941
C6	27	hprt2	8.70567	8.25047
C6	28	hprt2	10.0894	9.62391
C6	29	hprt2	11.4216	10.9458
C6	30	hprt2	12.6913	12.2052
C6	31	hprt2	13.8928	13.3964
C6	32	hprt2	14.8701	14.3634
C6	33	hprt2	15.7865	15.2696
C6	34	hprt2	16.6279	16.1007
C6	35	hprt2	17.3198	16.7822
C6	36	hprt2	17.8729	17.3251
C6	37	hprt2	18.3675	17.8094
C6	38	hprt2	18.796	18.2276
C6	39	hprt2	19.2617	18.683
C6	40	hprt2	19.5339	18.9449
C7	1
C7	2
C7	3
C7	4
C7	5
C7	6
C7	7
C7	8
C7	9
C7	10
C7	11
C7	12
C7	13
C7	14
C7	15
C7	16
C7	17
C7	18
C7	19
C7	20
C7	21
C7	22
C7	23
C7	24
C7	25
C7	26
C7	27
C7	28
C7	29
C7	30
C7	31
C7	32
C7	33
C7	34
C7	35
C7	36
C7	37
C7	38
C7	39
C7	40
C8	1
C8	2
C8	3
C8	4
C8	5
C8	6
C8	7
C8	8
C8	9
C8	10
C8	11
C8	12
C8	13
C8	14
C8	15
C8	16
C8	17
C8	18
C8	19
C8	20
C8	21
C8	22
C8	23
C8	24
C8	25
C8	26
C8	27
C8	28
C8	29
C8	30
C8	31
C8	32
C8	33
C8	34
C8	35
C8	36
C8	37
C8	38
C8	39
C8	40
C9	1
C9	2
C9	3
C9	4
C9	5
C9	6
C9	7
C9	8
C9	9
C9	10
C9	11
C9	12
C9	13
C9	14
C9	15
C9	16
C9	17
C9	18
C9	19
C9	20
C9	21
C9	22
C9	23
C9	24
C9	25
C9	26
C9	27
C9	28
C9	29
C9	30
C9	31
C9	32
C9	33
C9	34
C9	35
C9	36
C9	37
C9	38
C9	39
C9	40
C10	1
C10	2
C10	3
C10	4
C10	5
C10	6
C10	7
C10	8
C10	9
C10	10
C10	11
C10	12
C10	13
C10	14
C10	15
C10	16
C10	17
C10	18
C10	19
C10	20
C10	21
C10	22
C10	23
C10	24
C10	25
C10	26
C10	27
C10	28
C10	29
C10	30
C10	31
C10	32
C10	33
C10	34
C10	35
C10	36
C10	37
C10	38
C10	39
C10	40
C11	1
C11	2
C11	3
C11	4
C11	5
C11	6
C11	7
C11	8
C11	9
C11	10
C11	11
C11	12
C11	13
C11	14
C11	15
C11	16
C11	17
C11	18
C11	19
C11	20
C11	21
C11	22
C11	23
C11	24
C11	25
C11	26
C11	27
C11	28
C11	29
C11	30
C11	31
C11	32
C11	33
C11	34
C11	35
C11	36
C11	37
C11	38
C11	39
C11	40
C12	1
C12	2
C12	3
C12	4
C12	5
C12	6
C12	7
C12	8
C12	9
C12	10
C12	11
C12	12
C12	13
C12	14
C12	15
C12	16
C12	17
C12	18
C12	19
C12	20
C12	21
C12	22
C12	23
C12	24
C12	25
C12	26
C12	27
C12	28
C12	29
C12	30
C12	31
C12	32
C12	33
C12	34
C12	35
C12	36
C12	37
C12	38
C12	39
C12	40
D1	1	cib2	0.0343121	-0.015547
D1	2	cib2	0.0400407	-0.0098705
D1	3	cib2	0.0481831	-0.00178025
D1	4	cib2	0.0504837	0.000468224
D1	5	cib2	0.0521218	0.00205418
D1	6	cib2	0.0517008	0.00158099
D1	7	cib2	0.0514592	0.00128727
D1	8	cib2	0.0531157	0.00289159
D1	9	cib2	0.0509939	0.000717672
D1	10	cib2	0.0510437	0.000715303
D1	11	cib2	0.0522339	0.00185334
D1	12	cib2	0.0502645	-0.00016818
D1	13	cib2	0.0511536	0.000668773
D1	14	cib2	0.0497357	-0.00080129
D1	15	cib2	0.0495006	-0.00108853
D1	16	cib2	0.0486644	-0.00197692
D1	17	cib2	0.04987	-0.000823426
D1	18	cib2	0.0494886	-0.00125702
D1	19	cib2	0.0493466	-0.00145118
D1	20	cib2	0.0482686	-0.00258131
D1	21	cib2	0.0497331	-0.00116899
D1	22	cib2	0.0490956	-0.00185858
D1	23	cib2	0.0515276	0.000521216
D1	24	cib2	0.0495792	-0.00147933
D1	25	cib2	0.0503355	-0.000775167
D1	26	cib2	0.0494758	-0.00168699
D1	27	cib2	0.0496706	-0.00154433
D1	28	cib2	0.0503099	-0.000957241
D1	29	cib2	0.0505869	-0.000732323
D1	30	cib2	0.0509828	-0.000388639
D1	31	cib2	0.0508954	-0.000528099
D1	32	cib2	0.05075	-0.000725663
D1	33	cib2	0.0529374	0.00140959
D1	34	cib2	0.0552067	0.00362674
D1	35	cib2	0.0576107	0.00597856
D1	36	cib2	0.0615253	0.00984096
D1	37	cib2	0.0754216	0.0236852
D1	38	cib2	0.0972971	0.0455085
D1	39	cib2	0.140115	0.0882739
D1	40	cib2	0.22188	0.169987
D2	1	cib3	0.279881	-0.0552943
D2	2	cib3	0.336991	0.00177351
D2	3	cib3	0.3356	0.000340862
D2	4	cib3	0.335255	-4.60864e-05
D2	5	cib3	0.33541	6.6631e-05
D2	6	cib3	0.337172	0.0017868
D2	7	cib3	0.337009	0.00158203
D2	8	cib3	0.337761	0.00229231
D2	9	cib3	0.33676	0.00124927
D2	10	cib3	0.336943	0.00139086
D2	11	cib3	0.336501	0.000906819
D2	12	cib3	0.336147	0.000510512
D2	13	cib3	0.336172	0.000493828
D2	14	cib3	0.335787	6.68851e-05
D2	15	cib3	0.335161	-0.000601218
D2	16	cib3	0.33547	-0.000333499
D2	17	cib3	0.334073	-0.00177307
D2	18	cib3	0.334644	-0.00124312
D2	19	cib3	0.333515	-0.00241449
D2	20	cib3	0.333729	-0.00224282
D2	21	cib3	0.333005	-0.0030079
D2	22	cib3	0.33385	-0.00220556
D2	23	cib3	0.334025	-0.00207207
D2	24	cib3	0.334509	-0.0016298
D2	25	cib3	0.334725	-0.00145545
D2	26	cib3	0.334481	-0.00174146
D2	27	cib3	0.334529	-0.001736
D2	28	cib3	0.33408	-0.00222678
D2	29	cib3	0.336093	-0.000255411
D2	30	cib3	0.336074	-0.000315875
D2	31	cib3	0.338975	0.00254298
D2	32	cib3	0.339723	0.00324924
D2	33	cib3	0.345338	0.00882159
D2	34	cib3	0.355146	0.0185883
D2	35	cib3	0.374173	0.0375737
D2	36	cib3	0.407268	0.0706268
D2	37	cib3	0.477731	0.141048
D2	38	cib3	0.606408	0.269682
D2	39	cib3	0.856875	0.520107
D2	40	cib3	1.33075	0.993939
D3	1	hprt	-0.139557	-0.00827184
D3	2	hprt	-0.133468	-0.00238304
D3	3	hprt	-0.130706	0.000179436
D3	4	hprt	-0.128061	0.00262439
D3	5	hprt	-0.129192	0.0012938
D3	6	hprt	-0.129588	0.000697903
D3	7	hprt	-0.128358	0.00172823
D3	8	hprt	-0.128067	0.00181936
D3	9	hprt	-0.1291	0.000585918
D3	10	hprt	-0.128074	0.00141281
D3	11	hprt	-0.128625	0.000661509
D3	12	hprt	-0.129712	-0.00062488
D3	13	hprt	-0.129208	-0.000321136
D3	14	hprt	-0.129007	-0.000320005
D3	15	hprt	-0.129199	-0.000711623
D3	16	hprt	-0.130046	-0.00175871
D3	17	hprt	-0.129393	-0.00130502
D3	18	hprt	-0.128696	-0.000808127
D3	19	hprt	-0.129235	-0.00154673
D3	20	hprt	-0.130122	-0.00263412
D3	21	hprt	-0.130382	-0.00309386
D3	22	hprt	-0.128959	-0.00187063
D3	23	hprt	-0.127723	-0.00083424
D3	24	hprt	-0.128322	-0.00163324
D3	25	hprt	-0.127519	-0.00103037
D3	26	hprt	-0.126495	-0.000205861
D3	27	hprt	-0.126001	8.76307e-05
D3	28	hprt	-0.125631	0.000258158
D3	29	hprt	-0.126049	-0.000359883
D3	30	hprt	-0.124724	0.000765719
D3	31	hprt	-0.12518	0.000109322
D3	32	hprt	-0.125395	-0.000304842
D3	33	hprt	-0.125629	-0.000739302
D3	34	hprt	-0.12498	-0.000290279
D3	35	hprt	-0.124836	-0.000345891
D3	36	hprt	-0.12384	0.000450158
D3	37	hprt	-0.1226	0.00149036
D3	38	hprt	-0.121131	0.00275964
D3	39	hprt	-0.119876	0.00381441
D3	40	hprt	-0.115507	0.00798388
D4	1	cib22	0.0256161	-0.0303489
D4	2	cib22	0.0540874	-0.00184666
D4	3	cib22	0.05457	-0.00133299
D4	4	cib22	0.0573344	0.00146234
D4	5	cib22	0.0560533	0.000212277
D4	6	cib22	0.0562365	0.00042651
D4	7	cib22	0.055589	-0.000189977
D4	8	cib22	0.056886	0.001138
D4	9	cib22	0.0549748	-0.000742156
D4	10	cib22	0.0571466	0.00146062
D4	11	cib22	0.0564982	0.000843266
D4	12	cib22	0.0550125	-0.000611382
D4	13	cib22	0.0568721	0.00127921
D4	14	cib22	0.0550638	-0.000498094
D4	15	cib22	0.0558369	0.000305976
D4	16	cib22	0.0545922	-0.000907709
D4	17	cib22	0.0542873	-0.00118157
D4	18	cib22	0.054347	-0.00109082
D4	19	cib22	0.0546315	-0.000775345
D4	20	cib22	0.0571709	0.00179508
D4	21	cib22	0.0542498	-0.001095
D4	22	cib22	0.0535689	-0.00174488
D4	23	cib22	0.0541248	-0.00115803
D4	24	cib22	0.0542308	-0.001021
D4	25	cib22	0.0540575	-0.00116324
D4	26	cib22	0.0534559	-0.00173381
D4	27	cib22	0.0549761	-0.000182653
D4	28	cib22	0.0564533	0.00132555
D4	29	cib22	0.0602765	0.00517983
D4	30	cib22	0.0638401	0.00877439
D4	31	cib22	0.0738766	0.0188419
D4	32	cib22	0.0929371	0.0379334
D4	33	cib22	0.129459	0.0744859
D4	34	cib22	0.198418	0.143477
D4	35	cib22	0.33204	0.277129
D4	36	cib22	0.587934	0.533055
D4	37	cib22	1.07161	1.01676
D4	38	cib22	1.95482	1.9
D4	39	cib22	3.47513	3.42034
D4	40	cib22	5.68316	5.6284
D5	1	cib32	0.267949	-0.0566045
D5	2	cib32	0.323348	-0.00121401
D5	3	cib32	0.328466	0.00389498
D5	4	cib32	0.326633	0.0020541
D5	5	cib32	0.3259	0.00131263
D5	6	cib32	0.327483	0.00288641
D5	7	cib32	0.325466	0.00086084
D5	8	cib32	0.324709	9.52268e-05
D5	9	cib32	0.325876	0.00125395
D5	10	cib32	0.323899	-0.000731293
D5	11	cib32	0.323292	-0.00134703
D5	12	cib32	0.325108	0.000460489
D5	13	cib32	0.324212	-0.000444629
D5	14	cib32	0.323171	-0.00149441
D5	15	cib32	0.323387	-0.00128682
D5	16	cib32	0.324724	4.17713e-05
D5	17	cib32	0.323548	-0.00114289
D5	18	cib32	0.323548	-0.00115114
D5	19	cib32	0.322217	-0.0024914
D5	20	cib32	0.32329	-0.00142626
D5	21	cib32	0.320915	-0.0038102
D5	22	cib32	0.323667	-0.00106661
D5	23	cib32	0.322002	-0.00273992
D5	24	cib32	0.322806	-0.00194517
D5	25	cib32	0.322613	-0.00214594
D5	26	cib32	0.324528	-0.000239744
D5	27	cib32	0.322878	-0.00189895
D5	28	cib32	0.323476	-0.00130906
D5	29	cib32	0.324604	-0.000189322
D5	30	cib32	0.324872	6.96983e-05
D5	31	cib32	0.324335	-0.000476063
D5	32	cib32	0.324831	1.16011e-05
D5	33	cib32	0.326998	0.00217052
D5	34	cib32	0.329456	0.004619
D5	35	cib32	0.332451	0.00760565
D5	36	cib32	0.339613	0.0147594
D5	37	cib32	0.35174	0.0268775
D5	38	cib32	0.377579	0.0527078
D5	39	cib32	0.423511	0.0986313
D5	40	cib32	0.507894	0.183006
D6	1	hprt2	-0.076364	-0.00338193
D6	2	hprt2	-0.0729568	-0.000284706
D6	3	hprt2	-0.0734925	-0.00113043
D6	4	hprt2	-0.0728854	-0.000833351
D6	5	hprt2	-0.0716606	8.14316e-05
D6	6	hprt2	-0.0719993	-0.000567312
D6	7	hprt2	-0.0706725	0.000449529
D6	8	hprt2	-0.0707164	9.56341e-05
D6	9	hprt2	-0.0698845	0.000617488
D6	10	hprt2	-0.0689851	0.00120684
D6	11	hprt2	-0.0700361	-0.00015416
D6	12	hprt2	-0.0683757	0.00119624
D6	13	hprt2	-0.0693338	-7.18075e-05
D6	14	hprt2	-0.068528	0.000423955
D6	15	hprt2	-0.0695245	-0.000882601
D6	16	hprt2	-0.067269	0.00106295
D6	17	hprt2	-0.0672356	0.000786263
D6	18	hprt2	-0.0674624	0.000249509
D6	19	hprt2	-0.0678043	-0.000402416
D6	20	hprt2	-0.0676429	-0.000551062
D6	21	hprt2	-0.0668971	-0.000115225
D6	22	hprt2	-0.0684413	-0.00196945
D6	23	hprt2	-0.0664096	-0.0002478
D6	24	hprt2	-0.0659124	-6.05361e-05
D6	25	hprt2	-0.0646734	0.000868433
D6	26	hprt2	-0.0661913	-0.000959515
D6	27	hprt2	-0.0641465	0.000775272
D6	28	hprt2	-0.0641804	0.000431435
D6	29	hprt2	-0.0638815	0.00042029
D6	30	hprt2	-0.0641181	-0.000126307
D6	31	hprt2	-0.063183	0.000498813
D6	32	hprt2	-0.0645853	-0.00121358
D6	33	hprt2	-0.0640846	-0.00102287
D6	34	hprt2	-0.0621148	0.000636922
D6	35	hprt2	-0.0619343	0.000507416
D6	36	hprt2	-0.0605735	0.00155824
D6	37	hprt2	-0.0575513	0.00427042
D6	38	hprt2	-0.0540356	0.00747608
D6	39	hprt2	-0.0468453	0.0143564
D6	40	hprt2	-0.0333422	0.0275494
D7	1
D7	2
D7	3
D7	4
D7	5
D7	6
D7	7
D7	8
D7	9
D7	10
D7	11
D7	12
D7	13
D7	14
D7	15
D7	16
D7	17
D7	18
D7	19
D7	20
D7	21
D7	22
D7	23
D7	24
D7	25
D7	26
D7	27
D7	28
D7	29
D7	30
D7	31
D7	32
D7	33
D7	34
D7	35
D7	36
D7	37
D7	38
D7	39
D7	40
D8	1
D8	2
D8	3
D8	4
D8	5
D8	6
D8	7
D8	8
D8	9
D8	10
D8	11
D8	12
D8	13
D8	14
D8	15
D8	16
D8	17
D8	18
D8	19
D8	20
D8	21
D8	22
D8	23
D8	24
D8	25
D8	26
D8	27
D8	28
D8	29
D8	30
D8	31
D8	32
D8	33
D8	34
D8	35
D8	36
D8	37
D8	38
D8	39
D8	40
D9	1
D9	2
D9	3
D9	4
D9	5
D9	6
D9	7
D9	8
D9	9
D9	10
D9	11
D9	12
D9	13
D9	14
D9	15
D9	16
D9	17
D9	18
D9	19
D9	20
D9	21
D9	22
D9	23
D9	24
D9	25
D9	26
D9	27
D9	28
D9	29
D9	30
D9	31
D9	32
D9	33
D9	34
D9	35
D9	36
D9	37
D9	38
D9	39
D9	40
D10	1
D10	2
D10	3
D10	4
D10	5
D10	6
D10	7
D10	8
D10	9
D10	10
D10	11
D10	12
D10	13
D10	14
D10	15
D10	16
D10	17
D10	18
D10	19
D10	20
D10	21
D10	22
D10	23
D10	24
D10	25
D10	26
D10	27
D10	28
D10	29
D10	30
D10	31
D10	32
D10	33
D10	34
D10	35
D10	36
D10	37
D10	38
D10	39
D10	40
D11	1
D11	2
D11	3
D11	4
D11	5
D11	6
D11	7
D11	8
D11	9
D11	10
D11	11
D11	12
D11	13
D11	14
D11	15
D11	16
D11	17
D11	18
D11	19
D11	20
D11	21
D11	22
D11	23
D11	24
D11	25
D11	26
D11	27
D11	28
D11	29
D11	30
D11	31
D11	32
D11	33
D11	34
D11	35
D11	36
D11	37
D11	38
D11	39
D11	40
D12	1
D12	2
D12	3
D12	4
D12	5
D12	6
D12	7
D12	8
D12	9
D12	10
D12	11
D12	12
D12	13
D12	14
D12	15
D12	16
D12	17
D12	18
D12	19
D12	20
D12	21
D12	22
D12	23
D12	24
D12	25
D12	26
D12	27
D12	28
D12	29
D12	30
D12	31
D12	32
D12	33
D12	34
D12	35
D12	36
D12	37
D12	38
D12	39
D12	40
E1	1	cib2	0.296686	-0.0354731
E1	2	cib2	0.309268	-0.0282667
E1	3	cib2	0.327661	-0.0152503
E1	4	cib2	0.340784	-0.00750321
E1	5	cib2	0.351078	-0.00258508
E1	6	cib2	0.359353	0.000314294
E1	7	cib2	0.367187	0.00277194
E1	8	cib2	0.372885	0.00309401
E1	9	cib2	0.379543	0.00437598
E1	10	cib2	0.38586	0.00531744
E1	11	cib2	0.392064	0.00614525
E1	12	cib2	0.396708	0.00541327
E1	13	cib2	0.401304	0.00463391
E1	14	cib2	0.407253	0.00520656
E1	15	cib2	0.411002	0.0035801
E1	16	cib2	0.41444	0.00164187
E1	17	cib2	0.420168	0.00199383
E1	18	cib2	0.424002	0.000451767
E1	19	cib2	0.428227	-0.000699529
E1	20	cib2	0.43148	-0.0028225
E1	21	cib2	0.436022	-0.00365581
E1	22	cib2	0.44236	-0.00269409
E1	23	cib2	0.446266	-0.00416433
E1	24	cib2	0.452706	-0.00309944
E1	25	cib2	0.458716	-0.00246599
E1	26	cib2	0.468033	0.00147522
E1	27	cib2	0.481084	0.00915044
E1	28	cib2	0.50171	0.0244002
E1	29	cib2	0.53962	0.0569348
E1	30	cib2	0.605686	0.117624
E1	31	cib2	0.728147	0.234709
E1	32	cib2	0.951966	0.453153
E1	33	cib2	1.37338	0.869187
E1	34	cib2	2.14239	1.63283
E1	35	cib2	3.48044	2.9655
E1	36	cib2	5.49329	4.97298
E1	37	cib2	7.92695	7.40126
E1	38	cib2	10.1025	9.57144
E1	39	cib2	11.9545	11.4181
E1	40	cib2	13.6332	13.0913
E2	1	cib3	0.552669	-0.0945774
E2	2	cib3	0.63463	-0.0181153
E2	3	cib3	0.650732	-0.0075129
E2	4	cib3	0.660278	-0.00346553
E2	5	cib3	0.667501	-0.00174119
E2	6	cib3	0.674574	-0.000167535
E2	7	cib3	0.681312	0.00107234
E2	8	cib3	0.68954	0.00380077
E2	9	cib3	0.693819	0.00258106
E2	10	cib3	0.699328	0.00259188
E2	11	cib3	0.704603	0.00236756
E2	12	cib3	0.712479	0.00474523
E2	13	cib3	0.715398	0.00216504
E2	14	cib3	0.721341	0.00260948
E2	15	cib3	0.725404	0.00117364
E2	16	cib3	0.730069	0.000338974
E2	17	cib3	0.735776	0.000547863
E2	18	cib3	0.739644	-0.0010836
E2	19	cib3	0.743334	-0.00289227
E2	20	cib3	0.748349	-0.00337557
E2	21	cib3	0.753594	-0.00362975
E2	22	cib3	0.762597	-0.000125497
E2	23	cib3	0.771419	0.00319785
E2	24	cib3	0.786497	0.0127766
E2	25	cib3	0.811783	0.0325633
E2	26	cib3	0.857046	0.0723278
E2	27	cib3	0.93965	0.149433
E2	28	cib3	1.09288	0.297167
E2	29	cib3	1.37943	0.578211
E2	30	cib3	1.90858	1.10187
E2	31	cib3	2.86833	2.05612
E2	32	cib3	4.42852	3.61081
E2	33	cib3	6.56724	5.74403
[truncated: 1,847 more rows]

## Sheet: Melt Region Temperature Data
Block Type	96well
Chemistry	SYBR_GREEN
Experiment File Name	C:\Applied Biosystems\StepOne Software v2.3\experiments\cib23 cDNA brain 01242020 ac.eds
Experiment Run End Time	Not Started
Instrument Type	steponeplus
Passive Reference	ROX
Well	Well Location	Target	Reporter Dye	Reading 1	Reading 2	Reading 3	Reading 4	Reading 5	Reading 6	Reading 7	Reading 8	Reading 9	Reading 10	Reading 11	Reading 12	Reading 13	Reading 14	Reading 15	Reading 16	Reading 17	Reading 18	Reading 19	Reading 20	Reading 21	Reading 22	Reading 23	Reading 24	Reading 25	Reading 26	Reading 27	Reading 28	Reading 29	Reading 30	Reading 31	Reading 32	Reading 33	Reading 34	Reading 35	Reading 36	Reading 37	Reading 38	Reading 39	Reading 40	Reading 41	Reading 42	Reading 43	Reading 44	Reading 45	Reading 46
1	A1	cib2	SYBR	60.2192	60.5583	60.8423	61.1534	61.464	61.7325	62.0429	62.3388	62.6383	62.9428	63.2413	63.5416	63.8421	64.1484	64.447	64.7494	65.0455	65.3521	65.6371	65.9429	66.2538	66.5529	66.8593	67.1377	67.4459	67.7382	68.032	68.3302	68.6356	68.8872	69.2405	69.5407	69.8161	70.1378	70.4531	70.7381	71.0324	71.3459	71.6367	71.9268	72.2463	72.5461	72.8452	73.141	73.4303	73.7387
2	A2	cib3	SYBR	60.2192	60.5583	60.8423	61.1534	61.464	61.7325	62.0429	62.3388	62.6383	62.9428	63.2413	63.5416	63.8421	64.1484	64.447	64.7494	65.0455	65.3521	65.6371	65.9429	66.2538	66.5529	66.8593	67.1377	67.4459	67.7382	68.032	68.3302	68.6356	68.8872	69.2405	69.5407	69.8161	70.1378	70.4531	70.7381	71.0324	71.3459	71.6367	71.9268	72.2463	72.5461	72.8452	73.141	73.4303	73.7387
3	A3	hprt	SYBR	60.2188	60.5564	60.8423	61.1556	61.463	61.7318	62.044	62.3402	62.6422	62.946	63.2426	63.5416	63.8436	64.1485	64.4427	64.7477	65.046	65.3525	65.634	65.9462	66.2576	66.5531	66.8557	67.1324	67.4462	67.7356	68.0311	68.3289	68.6376	68.8881	69.2425	69.5437	69.812	70.1367	70.4484	70.7376	71.0352	71.3504	71.6394	71.9306	72.2489	72.5472	72.848	73.1407	73.4293	73.7397
4	A4	cib22	SYBR	60.2188	60.5564	60.8423	61.1556	61.463	61.7318	62.044	62.3402	62.6422	62.946	63.2426	63.5416	63.8436	64.1485	64.4427	64.7477	65.046	65.3525	65.634	65.9462	66.2576	66.5531	66.8557	67.1324	67.4462	67.7356	68.0311	68.3289	68.6376	68.8881	69.2425	69.5437	69.812	70.1367	70.4484	70.7376	71.0352	71.3504	71.6394	71.9306	72.2489	72.5472	72.848	73.1407	73.4293	73.7397
5	A5	cib32	SYBR	60.2213	60.5592	60.8455	61.1546	61.4591	61.7378	62.0412	62.336	62.6384	62.9483	63.2511	63.5431	63.8437	64.1451	64.4457	64.7481	65.0466	65.3516	65.6315	65.9454	66.2569	66.5598	66.8624	67.1342	67.4443	67.7385	68.0362	68.3327	68.6361	68.8839	69.2409	69.5464	69.8148	70.1375	70.4496	70.7371	71.0345	71.3492	71.6421	71.9316	72.2507	72.5521	72.8459	73.1431	73.4296	73.7387
6	A6	hprt2	SYBR	60.2213	60.5592	60.8455	61.1546	61.4591	61.7378	62.0412	62.336	62.6384	62.9483	63.2511	63.5431	63.8437	64.1451	64.4457	64.7481	65.0466	65.3516	65.6315	65.9454	66.2569	66.5598	66.8624	67.1342	67.4443	67.7385	68.0362	68.3327	68.6361	68.8839	69.2409	69.5464	69.8148	70.1375	70.4496	70.7371	71.0345	71.3492	71.6421	71.9316	72.2507	72.5521	72.8459	73.1431	73.4296	73.7387
13	B1	cib2	SYBR	60.2192	60.5583	60.8423	61.1534	61.464	61.7325	62.0429	62.3388	62.6383	62.9428	63.2413	63.5416	63.8421	64.1484	64.447	64.7494	65.0455	65.3521	65.6371	65.9429	66.2538	66.5529	66.8593	67.1377	67.4459	67.7382	68.032	68.3302	68.6356	68.8872	69.2405	69.5407	69.8161	70.1378	70.4531	70.7381	71.0324	71.3459	71.6367	71.9268	72.2463	72.5461	72.8452	73.141	73.4303	73.7387
14	B2	cib3	SYBR	60.2192	60.5583	60.8423	61.1534	61.464	61.7325	62.0429	62.3388	62.6383	62.9428	63.2413	63.5416	63.8421	64.1484	64.447	64.7494	65.0455	65.3521	65.6371	65.9429	66.2538	66.5529	66.8593	67.1377	67.4459	67.7382	68.032	68.3302	68.6356	68.8872	69.2405	69.5407	69.8161	70.1378	70.4531	70.7381	71.0324	71.3459	71.6367	71.9268	72.2463	72.5461	72.8452	73.141	73.4303	73.7387
15	B3	hprt	SYBR	60.2188	60.5564	60.8423	61.1556	61.463	61.7318	62.044	62.3402	62.6422	62.946	63.2426	63.5416	63.8436	64.1485	64.4427	64.7477	65.046	65.3525	65.634	65.9462	66.2576	66.5531	66.8557	67.1324	67.4462	67.7356	68.0311	68.3289	68.6376	68.8881	69.2425	69.5437	69.812	70.1367	70.4484	70.7376	71.0352	71.3504	71.6394	71.9306	72.2489	72.5472	72.848	73.1407	73.4293	73.7397
16	B4	cib22	SYBR	60.2188	60.5564	60.8423	61.1556	61.463	61.7318	62.044	62.3402	62.6422	62.946	63.2426	63.5416	63.8436	64.1485	64.4427	64.7477	65.046	65.3525	65.634	65.9462	66.2576	66.5531	66.8557	67.1324	67.4462	67.7356	68.0311	68.3289	68.6376	68.8881	69.2425	69.5437	69.812	70.1367	70.4484	70.7376	71.0352	71.3504	71.6394	71.9306	72.2489	72.5472	72.848	73.1407	73.4293	73.7397
17	B5	cib32	SYBR	60.2213	60.5592	60.8455	61.1546	61.4591	61.7378	62.0412	62.336	62.6384	62.9483	63.2511	63.5431	63.8437	64.1451	64.4457	64.7481	65.0466	65.3516	65.6315	65.9454	66.2569	66.5598	66.8624	67.1342	67.4443	67.7385	68.0362	68.3327	68.6361	68.8839	69.2409	69.5464	69.8148	70.1375	70.4496	70.7371	71.0345	71.3492	71.6421	71.9316	72.2507	72.5521	72.8459	73.1431	73.4296	73.7387
18	B6	hprt2	SYBR	60.2213	60.5592	60.8455	61.1546	61.4591	61.7378	62.0412	62.336	62.6384	62.9483	63.2511	63.5431	63.8437	64.1451	64.4457	64.7481	65.0466	65.3516	65.6315	65.9454	66.2569	66.5598	66.8624	67.1342	67.4443	67.7385	68.0362	68.3327	68.6361	68.8839	69.2409	69.5464	69.8148	70.1375	70.4496	70.7371	71.0345	71.3492	71.6421	71.9316	72.2507	72.5521	72.8459	73.1431	73.4296	73.7387
25	C1	cib2	SYBR	60.2192	60.5583	60.8423	61.1534	61.464	61.7325	62.0429	62.3388	62.6383	62.9428	63.2413	63.5416	63.8421	64.1484	64.447	64.7494	65.0455	65.3521	65.6371	65.9429	66.2538	66.5529	66.8593	67.1377	67.4459	67.7382	68.032	68.3302	68.6356	68.8872	69.2405	69.5407	69.8161	70.1378	70.4531	70.7381	71.0324	71.3459	71.6367	71.9268	72.2463	72.5461	72.8452	73.141	73.4303	73.7387
26	C2	cib3	SYBR	60.2192	60.5583	60.8423	61.1534	61.464	61.7325	62.0429	62.3388	62.6383	62.9428	63.2413	63.5416	63.8421	64.1484	64.447	64.7494	65.0455	65.3521	65.6371	65.9429	66.2538	66.5529	66.8593	67.1377	67.4459	67.7382	68.032	68.3302	68.6356	68.8872	69.2405	69.5407	69.8161	70.1378	70.4531	70.7381	71.0324	71.3459	71.6367	71.9268	72.2463	72.5461	72.8452	73.141	73.4303	73.7387
27	C3	hprt	SYBR	60.2188	60.5564	60.8423	61.1556	61.463	61.7318	62.044	62.3402	62.6422	62.946	63.2426	63.5416	63.8436	64.1485	64.4427	64.7477	65.046	65.3525	65.634	65.9462	66.2576	66.5531	66.8557	67.1324	67.4462	67.7356	68.0311	68.3289	68.6376	68.8881	69.2425	69.5437	69.812	70.1367	70.4484	70.7376	71.0352	71.3504	71.6394	71.9306	72.2489	72.5472	72.848	73.1407	73.4293	73.7397
28	C4	cib22	SYBR	60.2188	60.5564	60.8423	61.1556	61.463	61.7318	62.044	62.3402	62.6422	62.946	63.2426	63.5416	63.8436	64.1485	64.4427	64.7477	65.046	65.3525	65.634	65.9462	66.2576	66.5531	66.8557	67.1324	67.4462	67.7356	68.0311	68.3289	68.6376	68.8881	69.2425	69.5437	69.812	70.1367	70.4484	70.7376	71.0352	71.3504	71.6394	71.9306	72.2489	72.5472	72.848	73.1407	73.4293	73.7397
29	C5	cib32	SYBR	60.2213	60.5592	60.8455	61.1546	61.4591	61.7378	62.0412	62.336	62.6384	62.9483	63.2511	63.5431	63.8437	64.1451	64.4457	64.7481	65.0466	65.3516	65.6315	65.9454	66.2569	66.5598	66.8624	67.1342	67.4443	67.7385	68.0362	68.3327	68.6361	68.8839	69.2409	69.5464	69.8148	70.1375	70.4496	70.7371	71.0345	71.3492	71.6421	71.9316	72.2507	72.5521	72.8459	73.1431	73.4296	73.7387
30	C6	hprt2	SYBR	60.2213	60.5592	60.8455	61.1546	61.4591	61.7378	62.0412	62.336	62.6384	62.9483	63.2511	63.5431	63.8437	64.1451	64.4457	64.7481	65.0466	65.3516	65.6315	65.9454	66.2569	66.5598	66.8624	67.1342	67.4443	67.7385	68.0362	68.3327	68.6361	68.8839	69.2409	69.5464	69.8148	70.1375	70.4496	70.7371	71.0345	71.3492	71.6421	71.9316	72.2507	72.5521	72.8459	73.1431	73.4296	73.7387
37	D1	cib2	SYBR	60.2192	60.5583	60.8423	61.1534	61.464	61.7325	62.0429	62.3388	62.6383	62.9428	63.2413	63.5416	63.8421	64.1484	64.447	64.7494	65.0455	65.3521	65.6371	65.9429	66.2538	66.5529	66.8593	67.1377	67.4459	67.7382	68.032	68.3302	68.6356	68.8872	69.2405	69.5407	69.8161	70.1378	70.4531	70.7381	71.0324	71.3459	71.6367	71.9268	72.2463	72.5461	72.8452	73.141	73.4303	73.7387
38	D2	cib3	SYBR	60.2192	60.5583	60.8423	61.1534	61.464	61.7325	62.0429	62.3388	62.6383	62.9428	63.2413	63.5416	63.8421	64.1484	64.447	64.7494	65.0455	65.3521	65.6371	65.9429	66.2538	66.5529	66.8593	67.1377	67.4459	67.7382	68.032	68.3302	68.6356	68.8872	69.2405	69.5407	69.8161	70.1378	70.4531	70.7381	71.0324	71.3459	71.6367	71.9268	72.2463	72.5461	72.8452	73.141	73.4303	73.7387
39	D3	hprt	SYBR	60.2188	60.5564	60.8423	61.1556	61.463	61.7318	62.044	62.3402	62.6422	62.946	63.2426	63.5416	63.8436	64.1485	64.4427	64.7477	65.046	65.3525	65.634	65.9462	66.2576	66.5531	66.8557	67.1324	67.4462	67.7356	68.0311	68.3289	68.6376	68.8881	69.2425	69.5437	69.812	70.1367	70.4484	70.7376	71.0352	71.3504	71.6394	71.9306	72.2489	72.5472	72.848	73.1407	73.4293	73.7397
40	D4	cib22	SYBR	60.2188	60.5564	60.8423	61.1556	61.463	61.7318	62.044	62.3402	62.6422	62.946	63.2426	63.5416	63.8436	64.1485	64.4427	64.7477	65.046	65.3525	65.634	65.9462	66.2576	66.5531	66.8557	67.1324	67.4462	67.7356	68.0311	68.3289	68.6376	68.8881	69.2425	69.5437	69.812	70.1367	70.4484	70.7376	71.0352	71.3504	71.6394	71.9306	72.2489	72.5472	72.848	73.1407	73.4293	73.7397
41	D5	cib32	SYBR	60.2213	60.5592	60.8455	61.1546	61.4591	61.7378	62.0412	62.336	62.6384	62.9483	63.2511	63.5431	63.8437	64.1451	64.4457	64.7481	65.0466	65.3516	65.6315	65.9454	66.2569	66.5598	66.8624	67.1342	67.4443	67.7385	68.0362	68.3327	68.6361	68.8839	69.2409	69.5464	69.8148	70.1375	70.4496	70.7371	71.0345	71.3492	71.6421	71.9316	72.2507	72.5521	72.8459	73.1431	73.4296	73.7387
42	D6	hprt2	SYBR	60.2213	60.5592	60.8455	61.1546	61.4591	61.7378	62.0412	62.336	62.6384	62.9483	63.2511	63.5431	63.8437	64.1451	64.4457	64.7481	65.0466	65.3516	65.6315	65.9454	66.2569	66.5598	66.8624	67.1342	67.4443	67.7385	68.0362	68.3327	68.6361	68.8839	69.2409	69.5464	69.8148	70.1375	70.4496	70.7371	71.0345	71.3492	71.6421	71.9316	72.2507	72.5521	72.8459	73.1431	73.4296	73.7387
49	E1	cib2	SYBR	60.2192	60.5583	60.8423	61.1534	61.464	61.7325	62.0429	62.3388	62.6383	62.9428	63.2413	63.5416	63.8421	64.1484	64.447	64.7494	65.0455	65.3521	65.6371	65.9429	66.2538	66.5529	66.8593	67.1377	67.4459	67.7382	68.032	68.3302	68.6356	68.8872	69.2405	69.5407	69.8161	70.1378	70.4531	70.7381	71.0324	71.3459	71.6367	71.9268	72.2463	72.5461	72.8452	73.141	73.4303	73.7387
50	E2	cib3	SYBR	60.2192	60.5583	60.8423	61.1534	61.464	61.7325	62.0429	62.3388	62.6383	62.9428	63.2413	63.5416	63.8421	64.1484	64.447	64.7494	65.0455	65.3521	65.6371	65.9429	66.2538	66.5529	66.8593	67.1377	67.4459	67.7382	68.032	68.3302	68.6356	68.8872	69.2405	69.5407	69.8161	70.1378	70.4531	70.7381	71.0324	71.3459	71.6367	71.9268	72.2463	72.5461	72.8452	73.141	73.4303	73.7387
51	E3	hprt	SYBR	60.2188	60.5564	60.8423	61.1556	61.463	61.7318	62.044	62.3402	62.6422	62.946	63.2426	63.5416	63.8436	64.1485	64.4427	64.7477	65.046	65.3525	65.634	65.9462	66.2576	66.5531	66.8557	67.1324	67.4462	67.7356	68.0311	68.3289	68.6376	68.8881	69.2425	69.5437	69.812	70.1367	70.4484	70.7376	71.0352	71.3504	71.6394	71.9306	72.2489	72.5472	72.848	73.1407	73.4293	73.7397
52	E4	cib22	SYBR	60.2188	60.5564	60.8423	61.1556	61.463	61.7318	62.044	62.3402	62.6422	62.946	63.2426	63.5416	63.8436	64.1485	64.4427	64.7477	65.046	65.3525	65.634	65.9462	66.2576	66.5531	66.8557	67.1324	67.4462	67.7356	68.0311	68.3289	68.6376	68.8881	69.2425	69.5437	69.812	70.1367	70.4484	70.7376	71.0352	71.3504	71.6394	71.9306	72.2489	72.5472	72.848	73.1407	73.4293	73.7397
53	E5	cib32	SYBR	60.2213	60.5592	60.8455	61.1546	61.4591	61.7378	62.0412	62.336	62.6384	62.9483	63.2511	63.5431	63.8437	64.1451	64.4457	64.7481	65.0466	65.3516	65.6315	65.9454	66.2569	66.5598	66.8624	67.1342	67.4443	67.7385	68.0362	68.3327	68.6361	68.8839	69.2409	69.5464	69.8148	70.1375	70.4496	70.7371	71.0345	71.3492	71.6421	71.9316	72.2507	72.5521	72.8459	73.1431	73.4296	73.7387
54	E6	hprt2	SYBR	60.2213	60.5592	60.8455	61.1546	61.4591	61.7378	62.0412	62.336	62.6384	62.9483	63.2511	63.5431	63.8437	64.1451	64.4457	64.7481	65.0466	65.3516	65.6315	65.9454	66.2569	66.5598	66.8624	67.1342	67.4443	67.7385	68.0362	68.3327	68.6361	68.8839	69.2409	69.5464	69.8148	70.1375	70.4496	70.7371	71.0345	71.3492	71.6421	71.9316	72.2507	72.5521	72.8459	73.1431	73.4296	73.7387
61	F1	cib2	SYBR	60.2192	60.5583	60.8423	61.1534	61.464	61.7325	62.0429	62.3388	62.6383	62.9428	63.2413	63.5416	63.8421	64.1484	64.447	64.7494	65.0455	65.3521	65.6371	65.9429	66.2538	66.5529	66.8593	67.1377	67.4459	67.7382	68.032	68.3302	68.6356	68.8872	69.2405	69.5407	69.8161	70.1378	70.4531	70.7381	71.0324	71.3459	71.6367	71.9268	72.2463	72.5461	72.8452	73.141	73.4303	73.7387
62	F2	cib3	SYBR	60.2192	60.5583	60.8423	61.1534	61.464	61.7325	62.0429	62.3388	62.6383	62.9428	63.2413	63.5416	63.8421	64.1484	64.447	64.7494	65.0455	65.3521	65.6371	65.9429	66.2538	66.5529	66.8593	67.1377	67.4459	67.7382	68.032	68.3302	68.6356	68.8872	69.2405	69.5407	69.8161	70.1378	70.4531	70.7381	71.0324	71.3459	71.6367	71.9268	72.2463	72.5461	72.8452	73.141	73.4303	73.7387
63	F3	hprt	SYBR	60.2188	60.5564	60.8423	61.1556	61.463	61.7318	62.044	62.3402	62.6422	62.946	63.2426	63.5416	63.8436	64.1485	64.4427	64.7477	65.046	65.3525	65.634	65.9462	66.2576	66.5531	66.8557	67.1324	67.4462	67.7356	68.0311	68.3289	68.6376	68.8881	69.2425	69.5437	69.812	70.1367	70.4484	70.7376	71.0352	71.3504	71.6394	71.9306	72.2489	72.5472	72.848	73.1407	73.4293	73.7397
64	F4	cib22	SYBR	60.2188	60.5564	60.8423	61.1556	61.463	61.7318	62.044	62.3402	62.6422	62.946	63.2426	63.5416	63.8436	64.1485	64.4427	64.7477	65.046	65.3525	65.634	65.9462	66.2576	66.5531	66.8557	67.1324	67.4462	67.7356	68.0311	68.3289	68.6376	68.8881	69.2425	69.5437	69.812	70.1367	70.4484	70.7376	71.0352	71.3504	71.6394	71.9306	72.2489	72.5472	72.848	73.1407	73.4293	73.7397
65	F5	cib32	SYBR	60.2213	60.5592	60.8455	61.1546	61.4591	61.7378	62.0412	62.336	62.6384	62.9483	63.2511	63.5431	63.8437	64.1451	64.4457	64.7481	65.0466	65.3516	65.6315	65.9454	66.2569	66.5598	66.8624	67.1342	67.4443	67.7385	68.0362	68.3327	68.6361	68.8839	69.2409	69.5464	69.8148	70.1375	70.4496	70.7371	71.0345	71.3492	71.6421	71.9316	72.2507	72.5521	72.8459	73.1431	73.4296	73.7387
66	F6	hprt2	SYBR	60.2213	60.5592	60.8455	61.1546	61.4591	61.7378	62.0412	62.336	62.6384	62.9483	63.2511	63.5431	63.8437	64.1451	64.4457	64.7481	65.0466	65.3516	65.6315	65.9454	66.2569	66.5598	66.8624	67.1342	67.4443	67.7385	68.0362	68.3327	68.6361	68.8839	69.2409	69.5464	69.8148	70.1375	70.4496	70.7371	71.0345	71.3492	71.6421	71.9316	72.2507	72.5521	72.8459	73.1431	73.4296	73.7387
73	G1	cib2	SYBR	60.2192	60.5583	60.8423	61.1534	61.464	61.7325	62.0429	62.3388	62.6383	62.9428	63.2413	63.5416	63.8421	64.1484	64.447	64.7494	65.0455	65.3521	65.6371	65.9429	66.2538	66.5529	66.8593	67.1377	67.4459	67.7382	68.032	68.3302	68.6356	68.8872	69.2405	69.5407	69.8161	70.1378	70.4531	70.7381	71.0324	71.3459	71.6367	71.9268	72.2463	72.5461	72.8452	73.141	73.4303	73.7387
74	G2	cib3	SYBR	60.2192	60.5583	60.8423	61.1534	61.464	61.7325	62.0429	62.3388	62.6383	62.9428	63.2413	63.5416	63.8421	64.1484	64.447	64.7494	65.0455	65.3521	65.6371	65.9429	66.2538	66.5529	66.8593	67.1377	67.4459	67.7382	68.032	68.3302	68.6356	68.8872	69.2405	69.5407	69.8161	70.1378	70.4531	70.7381	71.0324	71.3459	71.6367	71.9268	72.2463	72.5461	72.8452	73.141	73.4303	73.7387
75	G3	hprt	SYBR	60.2188	60.5564	60.8423	61.1556	61.463	61.7318	62.044	62.3402	62.6422	62.946	63.2426	63.5416	63.8436	64.1485	64.4427	64.7477	65.046	65.3525	65.634	65.9462	66.2576	66.5531	66.8557	67.1324	67.4462	67.7356	68.0311	68.3289	68.6376	68.8881	69.2425	69.5437	69.812	70.1367	70.4484	70.7376	71.0352	71.3504	71.6394	71.9306	72.2489	72.5472	72.848	73.1407	73.4293	73.7397
76	G4	cib22	SYBR	60.2188	60.5564	60.8423	61.1556	61.463	61.7318	62.044	62.3402	62.6422	62.946	63.2426	63.5416	63.8436	64.1485	64.4427	64.7477	65.046	65.3525	65.634	65.9462	66.2576	66.5531	66.8557	67.1324	67.4462	67.7356	68.0311	68.3289	68.6376	68.8881	69.2425	69.5437	69.812	70.1367	70.4484	70.7376	71.0352	71.3504	71.6394	71.9306	72.2489	72.5472	72.848	73.1407	73.4293	73.7397
77	G5	cib32	SYBR	60.2213	60.5592	60.8455	61.1546	61.4591	61.7378	62.0412	62.336	62.6384	62.9483	63.2511	63.5431	63.8437	64.1451	64.4457	64.7481	65.0466	65.3516	65.6315	65.9454	66.2569	66.5598	66.8624	67.1342	67.4443	67.7385	68.0362	68.3327	68.6361	68.8839	69.2409	69.5464	69.8148	70.1375	70.4496	70.7371	71.0345	71.3492	71.6421	71.9316	72.2507	72.5521	72.8459	73.1431	73.4296	73.7387
78	G6	hprt2	SYBR	60.2213	60.5592	60.8455	61.1546	61.4591	61.7378	62.0412	62.336	62.6384	62.9483	63.2511	63.5431	63.8437	64.1451	64.4457	64.7481	65.0466	65.3516	65.6315	65.9454	66.2569	66.5598	66.8624	67.1342	67.4443	67.7385	68.0362	68.3327	68.6361	68.8839	69.2409	69.5464	69.8148	70.1375	70.4496	70.7371	71.0345	71.3492	71.6421	71.9316	72.2507	72.5521	72.8459	73.1431	73.4296	73.7387
85	H1	cib2	SYBR	60.2192	60.5583	60.8423	61.1534	61.464	61.7325	62.0429	62.3388	62.6383	62.9428	63.2413	63.5416	63.8421	64.1484	64.447	64.7494	65.0455	65.3521	65.6371	65.9429	66.2538	66.5529	66.8593	67.1377	67.4459	67.7382	68.032	68.3302	68.6356	68.8872	69.2405	69.5407	69.8161	70.1378	70.4531	70.7381	71.0324	71.3459	71.6367	71.9268	72.2463	72.5461	72.8452	73.141	73.4303	73.7387
86	H2	cib3	SYBR	60.2192	60.5583	60.8423	61.1534	61.464	61.7325	62.0429	62.3388	62.6383	62.9428	63.2413	63.5416	63.8421	64.1484	64.447	64.7494	65.0455	65.3521	65.6371	65.9429	66.2538	66.5529	66.8593	67.1377	67.4459	67.7382	68.032	68.3302	68.6356	68.8872	69.2405	69.5407	69.8161	70.1378	70.4531	70.7381	71.0324	71.3459	71.6367	71.9268	72.2463	72.5461	72.8452	73.141	73.4303	73.7387
87	H3	hprt	SYBR	60.2188	60.5564	60.8423	61.1556	61.463	61.7318	62.044	62.3402	62.6422	62.946	63.2426	63.5416	63.8436	64.1485	64.4427	64.7477	65.046	65.3525	65.634	65.9462	66.2576	66.5531	66.8557	67.1324	67.4462	67.7356	68.0311	68.3289	68.6376	68.8881	69.2425	69.5437	69.812	70.1367	70.4484	70.7376	71.0352	71.3504	71.6394	71.9306	72.2489	72.5472	72.848	73.1407	73.4293	73.7397
88	H4	cib22	SYBR	60.2188	60.5564	60.8423	61.1556	61.463	61.7318	62.044	62.3402	62.6422	62.946	63.2426	63.5416	63.8436	64.1485	64.4427	64.7477	65.046	65.3525	65.634	65.9462	66.2576	66.5531	66.8557	67.1324	67.4462	67.7356	68.0311	68.3289	68.6376	68.8881	69.2425	69.5437	69.812	70.1367	70.4484	70.7376	71.0352	71.3504	71.6394	71.9306	72.2489	72.5472	72.848	73.1407	73.4293	73.7397
89	H5	cib32	SYBR	60.2213	60.5592	60.8455	61.1546	61.4591	61.7378	62.0412	62.336	62.6384	62.9483	63.2511	63.5431	63.8437	64.1451	64.4457	64.7481	65.0466	65.3516	65.6315	65.9454	66.2569	66.5598	66.8624	67.1342	67.4443	67.7385	68.0362	68.3327	68.6361	68.8839	69.2409	69.5464	69.8148	70.1375	70.4496	70.7371	71.0345	71.3492	71.6421	71.9316	72.2507	72.5521	72.8459	73.1431	73.4296	73.7387
90	H6	hprt2	SYBR	60.2213	60.5592	60.8455	61.1546	61.4591	61.7378	62.0412	62.336	62.6384	62.9483	63.2511	63.5431	63.8437	64.1451	64.4457	64.7481	65.0466	65.3516	65.6315	65.9454	66.2569	66.5598	66.8624	67.1342	67.4443	67.7385	68.0362	68.3327	68.6361	68.8839	69.2409	69.5464	69.8148	70.1375	70.4496	70.7371	71.0345	71.3492	71.6421	71.9316	72.2507	72.5521	72.8459	73.1431	73.4296	73.7387
[truncated: 71 more columns]
