# Supplementary material for: Complexes of vertebrate TMC1/2 and CIB2/3 proteins form hair-cell mechanotransduction cation channels
Source: eLife journal article supplement (doi:10.7554/elife.89719), 2023-08-18
Supplement: fig1-data1 [file Figure1-qPCR cib3 ex3-ex5 02032020.xlsx]

## Sheet: Sheet1
	WT	mean	dCT		homo		dCT	ddCT	ddCT	fold change		mean fc	SD	SEM	SD (ctrl)	SM ctrl
	Ct				ct
CIB2	26.9687	27.0744	10.3259	10.4316	34.6243	34.4224	18.4631	-0.105717	8.13724	0.00355179	1	0.00460396	0.000841823	0.000376475	0.160162	0.0716268
	27.0715		10.4286		34.1901		18.0289	-0.00295067	7.6003	0.00515325
	27.1831		10.5402		34.4526		18.2914	0.108667	7.75112	0.00464172
	24.9367	25.1961	8.03418	8.2936	32.5935	32.507	16.1182	-0.259418	8.08402	0.00368525
	25.2794		8.37683		32.3061		15.8309	0.0832348	7.45405	0.00570306
	25.3723		8.46978		32.6214		16.1461	0.176184	7.67633	0.00488871
CIB3	26.5153	26.1999	9.8724	9.55699	25.3827	25.4251	9.2215	0.315409	-0.650897	1.57014	1	1.31448	0.357174	0.159733	0.208633	0.0933037
	26.1788		9.53596		25.4219		9.26063	-0.0210285	-0.275332	1.21027
	25.9055		9.26261		25.4707		9.30949	-0.29438	0.0468798	0.968028
	25.7655	25.635	8.86299	8.7325	24.4628	24.8018	7.98749	0.130493	-0.875501	1.83465
	25.5173		8.61475		24.6098		8.13454	-0.117747	-0.480213	1.39495
	25.6223		8.71975		25.333		8.8577	-0.0127455	0.137946	0.908812
HPRT	16.6518	16.6429			16.2695	16.1612
	16.6309				16.2225
	16.6459				15.9916
	16.9381	16.9025			16.4087	16.4753
	16.8455				16.4446
	16.924				16.5725							1	0.00460396	0.0716268	0.000376475
												1	1.31448	0.0933037	0.159733
															0.0716268	0.000376475
															0.0933037	0.159733
