# Supplementary material for: Complexes of vertebrate TMC1/2 and CIB2/3 proteins form hair-cell mechanotransduction cation channels
Source: eLife journal article supplement (doi:10.7554/elife.89719), 2023-08-18
Supplement: fig2-data1 [file elife-89719-fig2-data1-v1.zip]

## Sheet: Sheet1
Cib2; Cib3
								Click	8khz	16khz	24khz	32khz		Click	8khz	16khz	24khz	32khz
2018-10-05							Wt Homo P16 #5	40	25	20		45	Homo, Homo P16 #2	100	100	100	100	100
								40	25	20		45		100	100	100	100	100
													Homo, Homo P16 #6	100	100	100	100	100
2018-10-30							Wt Homo P16 #1	25	25	20	35	55		100	100	100	100	100
								25	25	20	35	55
							Wt Homo P16 #3	25	20	20	40	55
								25	20	20	40	55	Homo, Homo P16 #8	100	100	100	100	100
														100	100	100	100	100
2018-11-09							wt homo P16 #4	25	25	20	35	50	Homo, Homo P16 #7	100	100	100	100	100
								25	25	20	35	50		100	100	100	100	100
							wt homo #6 P16 (par elo)	20	25	20	35	65	Homo, Homo P16 #5	100	100	100	100	100
								20	25	20	35	65		100	100	100	100	100
mean								27	24	20	36.25	54		100	100	100	100	100
stdev								7.1492	2.10819	0	2.31455	6.99206	#DIV/0!	0	0	0	0	0
