# Supplementary material for: Complexes of vertebrate TMC1/2 and CIB2/3 proteins form hair-cell mechanotransduction cation channels
Source: eLife journal article supplement (doi:10.7554/elife.89719), 2023-08-18
Supplement: fig7-data1 [file elife-89719-fig7-data1-v1.pdf]

*hs TMC1-1*  
*hs TMC1-2*  
*mm TMC1-1*  
*mm TMC1-2*  
*dr Tmc1-1*  
*dr Tmc1-2*  
*hs TMC2-1*  
*hs TMC2-2*  
*mm TMC2*  
*dr Tmc2a*  
*dr Tmc2b-1*  
*dr Tmc2b-2*

4 9  
 -----MSPKMKVQIKVVEEK-----  
 -----MGSKMKVIKIVVEEK-----  
 -----MLQIQVVEEK-----  
 RLLRRRMPRHKLIAESVDVSI EVDGKDKESCYYVVEVEENCERGGKIKQASRD  
 RLLRRRMPRHKLIAESVDVSI EVDGKDKESCYYVVEVEENCERGGKIKQASRD  
 -----MSHQVGLKEELAS-----GGVGRKVSGS--  
 -----MPCRHTLGCPLVSLKELSS--RNHLGRLISHGRGHFPGEAVGTRT  
 -----MSPQLKSLDEEGD-----  
 -----MPKKSDDTRKRLQVGIEMDQ-----VDSAEED  
 -----MCVLLDVGWKWGD-----  
 -----MPRRKSDIEITMDDVGMEMDAE-----FDSGSDVDSKRR

14 24 34  
 -----EDETEESSSEEEVEEDKLP-----  
 -----EDETEESSSEEEVEEDKLP-----  
 -----EEDTEESSSEEEEDKLP-----  
 GKRRRERNGETRRKASEKRTNEGESKKAEEKKHEKGRHTARKAGEKHGRQRKR  
 GKRRRERNGETRRKASEKRTNEGESKKAEEKKHEKGRHTARKAGEKHGRQRKR  
 -----PHTGDRLLGRRSSSKRALKAEPTGRRGAQRSHQTERAGGSPSPGSPRR--  
 VHFPAAGDRLGRRSSSKRALKAEPTGRRGAQRSHQTERAGGSPSPGSPRR--  
 -----K SARRPRTKQTSRAACPQDGHRAQSSSRKDPAGKSPRPGSSRKR--  
 KKSKGKGGKAAAGKRGKASGDEDEDEDPPPKGRRRANKKPKAPVDEED--  
 -----LIVFVMTQKEEQKAGINQLNRREEEGKPNQQTVRRRAKRRMRNRA--  
 AKGRNPKPAARGKAKPADSVEESEEEDSPKRRRGRKRKQEDDES E--

36 46 56  
 -----RESLRPKRKRTRDVINEDDPEPEP  
 -----RESLRPKRKRTRDVINEDDPEPEP  
 -----RESLRPKRKRTRDVINEDDPEPEP  
 NAGEEDAEDKSSKKNMKNKKNKTLKLEEEKKDVKKKKRKHVKNEEDETNI  
 NAGEEDAEDKSSKKNMKNKKNKTLKLEEEKKDVKKKKRKHVKNEEDETNI  
 -----KQTGRRRHRLEELGQERGAERTCEGRRKRDERASFQERTAAPKR--  
 -----KQTGRRRHRLEELGQERGAERTCEGRRKRDERASFQERTAAPKR--  
 -----KQMEHGSYFLKGLQKQPKRVERSLGQ-RKKDRRTL S LKEQRASPKK  
 -----SDDIIPQRKSAGNRKGNVERSGDGDKKSGKGRTRRSKPKKNEK  
 -----EQKGRKKA VNSRRTAKKDESEEESEEEKGNKRGGKATGATKKEEEN

60 70 80  
 ED-----EETRKAREKERRRRLKRGAE EEE-----  
 ED-----EETRKAREKERRRRLKRGAE EEE-----  
 ED-----EETRKAREKERRRRLKRGAE EEE-----  
 ETK-----QHLKEEKRRKKRKPETTSSESEKSESASESES  
 ETK-----QHLKEEKRRKKRKPETTSSESEKSESASESES  
 EK-----EIPRREEKSRQKPPSSSLASSAGGES  
 EK-----EIPRREEKSRQKPPSSSLASSAGGES  
 E-----RALRKEAGKQLRKRPSSTLSSVSTGDS  
 KGK-----DSKDDSKDEKKNKSSSDSSDSEDES  
 KLSIPG-----REQQRKTSQRRSSPSSSSSSSDNNSDDES  
 NKEKKGNGKAGGKGSNDKQDDKDKKKNKGNSSSSSSSDNNSDDES

87 97 107 117  
 -----IDEEELERLKAELDEKRQI IATVKCKPWKMEKKI EVLKAEKK  
 -----IDEEELERLKAELDEKRQI IATVKCKPWKMEKKI EVLKAEKK  
 -----IDEEELERLKAELDENRQI IATVKCKPWKMEKKI EVLKAEKK  
 -----M IATVKCKPWKMEKKI EVLKAEKK  
 KNSPAVGLVGLSLTPEEL ENLKEAVEERKLLITQLKGPVPMRRLKLVLRSE  
 KNSPAVGLVGLSLTPEEL ENLKEAVEERKLLITQLKGPVPMRRLKLVLRSE  
 -----LSEEEALQILEQVEEKKLI IATMRKSPWMAKLLTELREAQ  
 -----LSEEEALQILEQVEEKKLI IATMRKSPWMAKLLTELREAQ  
 -----LSEEEALQILEQVEEKKLI IATMRKSPWMAKLLTELREAQ  
 -----MSEEGEMALMEVEEKKKLI ANIRNKPRMRRRLKVLKLEAQ  
 -----MSEEGEMALMEVEEKKKLI ANIRNKPRMRRRLKVLKLEAQ  
 -----MSEEGEMARLKEVEEKKKLI IATLRNKPWRMRRRLKVLKLEAQ  
 -----MSEEGEMARLKEVEEKKKLI IATLRNKPWRMRRRLKVLKLEAQ

127 137 147 157 167 177  
 FVSENEGALGKGGKGRWFAFKMMAKKWAKFLRDFENFKAACVPWENKIAI E  
 FVSENEGALGKGGKGRWFAFKMMAKKWAKFLRDFENFKAACVPWENKIAI E  
 FVSENEGALGKGGKGRWFAFKMMAKKWAKFLRDFENFKAACVPWENKIAI E  
 FVSENEGALGKGGKGRWFAFKMMAKKWAKFLRDFENFKAACVPWENKIAI E  
 FVEKYEGALGKGGKGRKLYAYKMMMKKWKFRDFENFKTACIPWEMKIKEL E  
 FVEKYEGALGKGGKGRKLYAYKMMMKKWKFRDFENFKTACIPWEMKIKEL E  
 FVEKYEGALGKGGKGRKLYAYKMMMKKWKFRDFENFKTACIPWEMKIKEL E  
 FVEKYEGALGKGGKGRKLYAYKMMMKKWKFRDFENFKTACIPWEMKIKEL E  
 FVEKYEGALGKGGKGRKLYAYKMMMKKWKFRDFENFKTACIPWEMKIKEL E  
 FVEKYEGALGKGGKGRKLYAYKMMMKKWKFRDFENFKTACIPWEMKIKEL E  
 FVDFEGALGKGGKGRKLYAYKMMMKKWKFRDFENFKTACIPWEMKIKEL E  
 FVEKFEFEGALGKGGKRRLYAYKMMMKKWKFRDFENFKTACIPWESRIKEVE  
 FVEKFEFEGALGKGGKRRLYAYKMMMKKWKFRDFENFKTACIPWESRIKEVE

187 197 207 217 227  
 SQFGSSVASVYFLFLRWYGVNMLVFLITFSLIMLPEYLVGLPYGSLPRKTVPR  
 SQFGSSVASVYFLFLRWYGVNMLVFLITFSLIMLPEYLVGLPYGSLPRKTVPR  
 SQFGSSVASVYFLFLRWYGVNMLVFLITFSLIMLPEYLVGLPYGSLPRKTVPR  
 SQFGSSVASVYFLFLRWYGVNMLVFLITFSLIMLPEYLVGLPYGSLPRKTVPR  
 SHFGSSVASVYFIFLRWYGVNMLVFLGLIFGLV IPEVLMGMPYGSIPRKTVP  
 SHFGSSVASVYFIFLRWYGVNMLVFLGLIFGLV IPEVLMGMPYGSIPRKTVP

237 247 257 267 277  
 AEEASAANFVGLYDFNGLAQYVFLFYGYDNKRTIGWMNFRFLPSYFLVGMIC  
 AEEASAANFVGLYDFNGLAQYVFLFYGYDNKRTIGWMNFRFLPSYFLVGMIC  
 AEEASAANFVGLYDFNGLAQYVFLFYGYDNKRTIGWMNFRFLPSYFLVGMIC  
 AEEASAANFVGLYDFNGLAQYVFLFYGYDNKRTIGWMNFRFLPSYFLVGMIC  
 EEEASAMNFVLDWDFGGYAKYVFLFYGYNSQRAIGWLFRMLPSYFLVGVGT  
 EEEASAMNFVLDWDFGGYAKYVFLFYGYNSQRAIGWLFRMLPSYFLVGVGT  
 AEEEKAMDFSVLWDFEGYIKYSALFYGYNNQRTIGWLRYLPMAYFMVGVSV  
 AEEEKAMDFSVLWDFEGYIKYSALFYGYNNQRTIGWLRYLPMAYFMVGVSV  
 AEEEKAMDFSVLWDFEGYIKYSALFYGYNNQRTIGWLRYLPMAYFMVGVSV  
 AEEEKAMDFSVLWDFEGYIKYSALFYGYNNQRTIGWLRYLPMAYFMVGVSV  
 EEDQDAMDYVLDWDFEGYIKYSALFYGYNNQRTIGWLRYLPMAYFMVGVSV  
 EEDQDAMDYVLDWDFEGYIKYSALFYGYNNQRTIGWLRYLPMAYFMVGVSV  
 EEDQDAMDYVLDWDFEGYIKYSALFYGYNNQRTIGWLRYLPMAYFMVGVSV  
 EEDQDAMDYVLDWDFEGYIKYSALFYGYNNQRTIGWLRYLPMAYFMVGVSV

287 297 307 317 327  
 IGYSLVFLVLLKAMTKNIGDDG-GGDDNTFNFSSWKVFTSWDYLIIGNPETADNKF  
 IGYSLVFLVLLKAMTKNIGDDG-GGDDNTFNFSSWKVFTSWDYLIIGNPETADNKF  
 IGYSLVFLVLLKAMTKNIGDDG-GGDDNTFNFSSWKVFTSWDYLIIGNPETADNKF  
 IGYSLVFLVLLKAMTKNIGDDG-GGDDNTFNFSSWKVFTSWDYLIIGNPETADNKF  
 VAYSVMVVRTMARNANEEG-GGDDTFFNFSSWKVFTSWDYLIIGNPETADNKF  
 VAYSVMVVRTMARNANEEG-GGDDTFFNFSSWKVFTSWDYLIIGNPETADNKF  
 FGYSLIIIVIRSMASNTQGSTGEGSDNFTFSSWKVFTSWDYLIIGNPETADNKF  
 FGYSLIIIVIRSMASNTQGSTGEGSDNFTFSSWKVFTSWDYLIIGNPETADNKF  
 FGYSLIIIVIRSMASNTQGSTGEGSDNFTFSSWKVFTSWDYLIIGNPETADNKF  
 FGYSLIIIVIRSMASNTQGSTGEGSDNFTFSSWKVFTSWDYLIIGNPETADNKF  
 FGYSLIIIVIRSMASNTQGSTGEGSDNFTFSSWKVFTSWDYLIIGNPETADNKF  
 FGYSLIIIVIRSMASNTQGSTGEGSDNFTFSSWKVFTSWDYLIIGNPETADNKF  
 FGYSLIIIVIRSMASNTQGSTGEGSDNFTFSSWKVFTSWDYLIIGNPETADNKF

346 356 366 376 386  
 SITMNFKEAITEEKAQVEENVHLIRFLRFLANFVFLTLGGSGYLI FWA VKR  
 SITMNFKEAITEEKAQVEENVHLIRFLRFLANFVFLTLGGSGYLI FWA VKR  
 SITMNFKEAITEEKAQVEENVHLIRFLRFLANFVFLTLGGSGYLI FWA VKR  
 SITMNFKEAITEEKAQVEENVHLIRFLRFLANFVFLTLGGSGYLI FWA VKR  
 SITTSFKEAIVEEQESRKKDDNHLRFRFLANFVFLTLGGSGYLI FWA VKR  
 SITTSFKEAIVEEQESRKKDDNHLRFRFLANFVFLTLGGSGYLI FWA VKR  
 SITTSFKESIVDEEQENKKNENHLRFRFLANFVFLTLGGSGYLI FWA VKR

396 406 416 426 436  
 SQEFAQQDDPTLGWWEKNEMNMVMSLLGMFCPTLFDLFAEL EDPYHPLIALKWL  
 SQEFAQQDDPTLGWWEKNEMNMVMSLLGMFCPTLFDLFAEL EDPYHPLIALKWL  
 SQEFAQQDDPTLGWWEKNEMNMVMSLLGMFCPTLFDLFAEL EDPYHPLIALKWL  
 SQEFAQQDDPTLGWWEKNEMNMVMSLLGMFCPTLFDLFAEL EDPYHPLIALKWL  
 SQEFALEGLLENYGWWEKNEMNMVMSLLGMFCPTLFDLFAEL EDPYHPLIALKWL

446 456 466 476 486  
 LGRIFALLLGNLYVFI LALMDEINNKIEEEKLVKANITLWEANMIKAYNAS--  
 LGRIFALLLGNLYVFI LALMDEINNKIEEEKLVKANITLWEANMIKAYNAS--

503 513 523 533 543  
 FSENSTGPPFFVHPADVPRGRCWETVMGQEFVRLTVSDVLTYYTILIGDFFL  
 FSENSTGPPFFVHPADVPRGRCWETVMGQEFVRLTVSDVLTYYTILIGDFFL  
 GLSGNTTGAFFVHPADVPRGRCWETVMGQEFVRLTVSDVLTYYTILIGDFFL  
 GLSGNTTGAFFVHPADVPRGRCWETVMGQEFVRLTVSDVLTYYTILIGDFFL  
 -VPDNSTAPPLVHPADVPRGRCWETVMGQEFVRLTVSDVLTYYTILIGDFFL  
 -VPDNSTAPPLVHPADVPRGRCWETVMGQEFVRLTVSDVLTYYTILIGDFFL  
 --GWNESVPRPPLHPADVPRGRCWETVMGQEFVRLTVSDVLTYYTILIGDFFL  
 --GWNESVPRPPLHPADVPRGRCWETVMGQEFVRLTVSDVLTYYTILIGDFFL  
 NPNNDTGTPPP--INPADAIRGRCWETVGVFEVFKLTVSDIQTYYTILIGDFFL  
 QYNIITENI PPPNIAPADVIRGRCWETVGVFEVFKLTVSDIQTYYTILIGDFFL

553 563 573 583 593  
 RACFVRFVFCNYCWCWDL EYGYPSYTFEDI SGNV LALI FNQGMIMWGSFFAPSLP  
 RAVLVRFLNNCWCWDL EYGYPSYTFEDI SGNV LALI FNQGMIMWGSFFAPSLP  
 RAVLVRFLNNCWCWDL EYGYPSYTFEDI SGNV LALI FNQGMIMWGSFFAPSLP  
 RACFVRFVFCNYCWCWDL EYGYPSYTFEDI SGNV LALI FNQGMIMWGSFFAPSLP  
 RALIVRFLNNCWCWDL EYGYPSYTFEDI SGNV LALI FNQGMIMWGSFFAPSLP  
 RALIVRFLNNCWCWDL EYGYPSYTFEDI SGNV LALI FNQGMIMWGSFFAPSLP

603 613 623 633 643  
 GINILRLHTSMYFCQWAVMCCNVP EARVFKASRSNNFYLGMLLLILFLSTMPV  
 GINILRLHTSMYFCQWAVMCCNVP EARVFKASRSNNFYLGMLLLILFLSTMPV  
 GINILRLHTSMYFCQWAVMCCNVP EARVFKASRSNNFYLGMLLLILFLSTMPV  
 GINILRLHTSMYFCQWAVMCCNVP EARVFKASRSNNFYLGMLLLILFLSTMPV  
 ALNLLRLHVSMSYLQCAWVMCCNVPQERVFKASRSNNFYMGMLLLILFLSTLPA  
 ALNLLRLHVSMSYLQCAWVMCCNVPQERVFKASRSNNFYMGMLLLILFLSTLPA  
 GINILRLHTSMYFCQWAVMCCNVP EARVFKASRSNNFYMGMLLLILFLSTLPA  
 GINILRLHTSMYFCQWAVMCCNVP EARVFKASRSNNFYMGMLLLILFLSTLPA  
 GINILRLHTSMYFCQWAVMCCNVP EARVFKASRSNNFYMGMLLLILFLSTLPA  
 GINILRLHTSMYFCQWAVMCCNVP EARVFKASRSNNFYMGMLLLILFLSTLPA  
 GINILRLHTSMYFCQWAVMCCNVP EARVFKASRSNNFYMGMLLLILFLSTLPA

653 663 673 683 693 703  
 LYMLVSLPPSFDGCGPFSGKRMFVFI GETLEHDFP SWMAKILRQLSNPGLVIA  
 IYTVISLPPSFDGCGPFSGKRMFVFI GETLEHDFP SWMAKILRQLSNPGLVIA

712 722 732 742 745  
 VILVMV-LAIYYLNATAKGGQKAAALDLKMKMQAL ENKMR--NKKMA----  
 VILVMV-LAIYYLNATAKGGQKAAALDLKMKMQAL ENKMR--NKKMA----  
 VILVMV-LAIYYLNATAKGGQKAAALDLKMKMQAL ENKMR--NKKMA----  
 VILVMV-LAIYYLNATAKGGQKAAALDLKMKMQAL ENKMR--NKKMA----  
 FLLLLLV-LAIYYLQSTSKTYKRVNMLKLLKQAQNEENKMR--NKKMA----  
 FLLLLLV-LAIYYLQSTSKTYKRVNMLKLLKQAQNEENKMR--NKKMA----  
 AII LLMF-LAIYYLNSVSKLSRANALRKKIQLVREVEKSH--KSVK GKATAR  
 AII LLMF-LAIYYLNSVSKLSRANALRKKIQLVREVEKSH--KSVK GKATAR  
 AII LLMF-LAIYYLNSVSKLSRANALRKKIQLVREVEKSH--KSVK GKATAR  
 AII LLMF-LAIYYLNSVSKLSRANALRKKIQLVREVEKSH--KSVK GKATAR  
 AVLLMV-LAIYYLNSVSKLSRANALRKKIQLVREVEKSH--KSVK GKATAR  
 VVLLMV-LAIYYLNSVSKLSRANALRKKIQLVREVEKSH--KSVK GKATAR  
 VVLLMV-LAIYYLNSVSKLSRANALRKKIQLVREVEKSH--KSVK GKATAR

750 760  
 -----AARAAAAGRQ-----  
 -----AARAAAAGRQ-----  
 -----AARAAAAGRQ-----  
 -----AARAAAAGRQ-----  
 DLE-----QARAAEQRRNSIS-----DLGV  
 DLE-----QARAAEQRRNSIS-----DLGV  
 DSEDTPKS-----SKNATQLQLTKEETPPSASQSQAMDKKAQGP  
 DSEDTPKS-----SKNATQLQLTKEETPPSASQSQAMDKKAQGP  
 YSEDITKN-----SKNATQILHTKEEPTSHSSSQIQLDCKAAGP  
 DLEDLLPNRPPPPSPRENIEAKNQGQGGKSAKV--KPGTAG-----GV  
 DLEDLLPNRPPPPSPRENIEAKNQGQGGKSAKV--KPGTAG-----GV  
 DLEDLLPNRPPPPSPRENIEAKNQGQGGKSAKV--KPGTAG-----GV  
 DLEDLLPNRPPPPSPRENIEAKNQGQGGKSAKV--KPGTAG-----GV

853 863 873 883 893 903  
 NEENPESHVSSSHTSRPPASR--GHTSSGHLPCHPQQPKN-----SK  
 NEENPESHVSSSHTSRPPASR--GHTSSGHLPCHPQQPKN-----SK  
 GTSNSASRTTLPASGHLPI SRPPG--IGPDSGHAP SQTHPWRASAGKS AQRP  
 GTSNSASRTTLPASGHLPI SRPPG--IGPDSGHAP SQTHPWRASAGKS AQRP  
 HTSSTEGGASPTSWHHVGSOPRRGR--DQSQPQSTYTRGSRSGKTRPP  
 HTSSTEGGASPTSWHHVGSOPRRGR--DQSQPQSTYTRGSRSGKTRPP  
 HVQKDVSLAAANP--RAPVTRAPGRPGPLPQPP-----GAGRGGRGQPP  
 HVQKDVSLAAANP--RAPVTRAPGRPGPLPQPP-----GAGRGGRGQPP  
 HVQKDVSLAAANP--RAPVTRAPGRPGPLPQPP-----GAGRGGRGQPP  
 HVQKDVSLAAANP--RAPVTRAPGRPGPLPQPP-----GAGRGGRGQPP

953 963 973 983 993  
 VILVMV-LAIYYLNATAKGGQKAAALDLKMKMQAL ENKMR--NKKMA----  
 VILVMV-LAIYYLNATAKGGQKAAALDLKMKMQAL ENKMR--NKKMA----  
 VILVMV-LAIYYLNATAKGGQKAAALDLKMKMQAL ENKMR--NKKMA----  
 VILVMV-LAIYYLNATAKGGQKAAALDLKMKMQAL ENKMR--NKKMA----  
 FLLLLLV-LAIYYLQSTSKTYKRVNMLKLLKQAQNEENKMR--NKKMA----  
 FLLLLLV-LAIYYLQSTSKTYKRVNMLKLLKQAQNEENKMR--NKKMA----  
 AII LLMF-LAIYYLNSVSKLSRANALRKKIQLVREVEKSH--KSVK GKATAR  
 AII LLMF-LAIYYLNSVSKLSRANALRKKIQLVREVEKSH--KSVK GKATAR  
 AII LLMF-LAIYYLNSVSKLSRANALRKKIQLVREVEKSH--KSVK GKATAR  
 AII LLMF-LAIYYLNSVSKLSRANALRKKIQLVREVEKSH--KSVK GKATAR  
 AVLLMV-LAIYYLNSVSKLSRANALRKKIQLVREVEKSH--KSVK GKATAR  
 VVLLMV-LAIYYLNSVSKLSRANALRKKIQLVREVEKSH--KSVK GKATAR  
 VVLLMV-LAIYYLNSVSKLSRANALRKKIQLVREVEKSH--KSVK GKATAR

1053 1063 1073 1083 1093 1103  
 -----AARAAAAGRQ-----  
 -----AARAAAAGRQ-----  
 -----AARAAAAGRQ-----  
 -----AARAAAAGRQ-----  
 DLE-----QARAAEQRRNSIS-----DLGV  
 DLE-----QARAAEQRRNSIS-----DLGV  
 DSEDTPKS-----SKNATQLQLTKEETPPSASQSQAMDKKAQGP  
 DSEDTPKS-----SKNATQLQLTKEETPPSASQSQAMDKKAQGP  
 YSEDITKN-----SKNATQILHTKEEPTSHSSSQIQLDCKAAGP  
 DLEDLLPNRPPPPSPRENIEAKNQGQGGKSAKV--KPGTAG-----GV  
 DLEDLLPNRPPPPSPRENIEAKNQGQGGKSAKV--KPGTAG-----GV  
 DLEDLLPNRPPPPSPRENIEAKNQGQGGKSAKV--KPGTAG-----GV  
 DLEDLLPNRPPPPSPRENIEAKNQGQGGKSAKV--KPGTAG-----GV

hs TMC1-1  
 hs TMC1-2  
 mm TMC1-1  
 mm TMC1-2  
 dr Tmc1-1  
 dr Tmc1-2  
 hs TMC2-1  
 hs TMC2-2  
 mm TMC2  
 dr Tmc2a  
 dr Tmc2b-1  
 dr Tmc2b-2

**TMC sequence alignment.** Protein sequences correspond to: *hs TMC1-1* (NCBI ID: NP\_619636.2), *hs TMC1-2* (NCBI ID: XP\_016869745.1), *mm TMC1-1* (NCBI ID: NP\_083229.1), *mm TMC1-2* (NCBI ID: XP\_036017315.1), *dr Tmc1-1* (NCBI ID: NP\_012299610.1), *dr Tmc1-2* (NCBI ID: XP\_021331607.1), *hs TMC2-1* (NCBI ID: NP\_542789.2), *hs TMC2-2* (NCBI ID: NP\_005260717.1), *mm TMC2* (NCBI ID: NP\_619596.1), *dr Tmc2a* (NCBI ID: NP\_001289166.1), *dr Tmc2b-1* (NCBI ID: NP\_001289152.1), and *dr Tmc2b-2* (NCBI ID: XP\_017211636.1). Secondary structures underneath the sequences are based on AF2 models of *hs TMC1*. Interface residues between TMC-NT/IL1 and CIB proteins were based on our AF2 model (for NT) and on Liang et al. (blue brackets).
