# Supplementary material for: Complexes of vertebrate TMC1/2 and CIB2/3 proteins form hair-cell mechanotransduction cation channels
Source: eLife journal article supplement (doi:10.7554/elife.89719), 2023-08-18
Supplement: fig7-figsupp5-data1 [file 20220329qS75q16600qFWqhs15NCIB2KozDelqhsTMC1IL1.xls]

## Sheet: Curves
10
S75q16600qmicroplate004qFWq15NhsCIB2KozDelqhsTMC1IL1q03292022:10_UV
ml	mAU
0	434.452
0.146475	-248.144
0.29295	-251.479
0.439425	-263.785
0.5859	-268.58
0.732375	-269.747
0.87885	-270.416
1.02533	-269.776
1.1718	-270.001
1.31828	-270.059
1.46475	-270.299
1.61123	-270.214
1.7577	-270.216
1.90418	-269.645
2.05065	-269.561
2.19713	-270.017
2.3436	-268.752
2.49008	-268.933
2.63655	-269.255
2.78303	-269.35
2.9295	-269.294
3.07598	-269.272
3.22245	-269.736
3.36893	-269.917
3.5154	-269.641
3.66188	-269.906
3.80835	-270.585
3.95483	-270.659
4.1013	-270.599
4.24778	-271.373
4.39425	-271.15
4.54073	-271.384
4.6872	-271.591
4.83368	-272.312
4.98015	-272.883
5.12663	-272.937
5.2731	-273.407
5.41958	-273.845
5.56605	-274.092
5.71253	-274.552
5.859	-274.846
6.00548	-275.113
6.15195	-275.557
6.29843	-276.169
6.4449	-276.057
6.59138	-276.342
6.73785	-276.946
6.88433	-277.184
7.0308	-277.685
7.17728	-277.781
7.32375	-278.001
7.47023	-278.322
7.6167	-278.247
7.76318	-278.593
7.90965	-279.279
8.05613	-279.174
8.2026	-279.426
8.34908	-279.29
8.49555	-279.577
8.64203	-279.41
8.7885	-279.536
8.93498	-279.518
9.08145	-279.866
9.22793	-280.406
9.3744	-280.574
9.52088	-280.816
9.66735	-281.121
9.81383	-281.232
9.9603	-281.248
10.1068	-281.698
10.2533	-281.443
10.3997	-281.656
10.5462	-281.884
10.6927	-282.049
10.8392	-281.964
10.9856	-282.134
11.1321	-282.254
11.2786	-282.364
11.4251	-282.616
11.5715	-282.81
11.718	-282.75
11.8645	-282.555
12.011	-282.959
12.1574	-282.637
12.3039	-282.672
12.4504	-283.221
12.5969	-283.349
12.7433	-283.287
12.8898	-283.178
13.0363	-283.515
13.1828	-283.503
13.3292	-283.969
13.4757	-283.889
13.6222	-283.661
13.7687	-284.16
13.9151	-283.979
14.0616	-284.166
14.2081	-284.599
14.3546	-284.505
14.501	-284.316
14.6475	-284.618
14.794	-284.5
14.9405	-284.667
15.0869	-284.95
15.2334	-284.645
15.3799	-285.132
15.5264	-284.638
15.6728	-284.887
15.8193	-284.966
15.9658	-284.859
16.1123	-285.685
16.2587	-285.249
16.4052	-284.958
16.5517	-284.913
16.6982	-285.066
16.8446	-285.194
16.9911	-285.21
17.1376	-285.472
17.2841	-285.521
17.4305	-285.179
17.577	-285.073
17.7235	-0.071
17.87	-0.494
18.0164	-0.353
18.1629	-0.013
18.3094	-0.147
18.4559	-0.012
18.6023	-0.144
18.7488	-0.581
18.8953	-0.433
19.0418	-0.554
19.1882	-0.292
19.3347	-0.473
19.4812	0.321
19.6277	-0.422
19.7741	-0.581
19.9206	-0.625
20.0671	-0.629
20.2136	-0.8
20.36	-0.409
20.5065	-0.391
20.653	-0.882
20.7995	-0.673
20.9459	-0.946
21.0924	-0.98
21.2389	-1.291
21.3854	-1.137
21.5318	-1.209
21.6783	-1.534
21.8248	-1.459
21.9713	-1.248
22.1177	-1.984
22.2642	-1.849
22.4107	-2.042
22.5572	-1.795
22.7036	-1.864
22.8501	-2.32
22.9966	-2.634
23.1431	-2.368
23.2895	-2.746
23.436	-2.818
23.5825	-2.924
23.729	-2.611
23.8754	-3.11
24.0219	-2.785
24.1684	-2.936
24.3149	-2.914
24.4613	-2.578
24.6078	-3.172
24.7543	-3.025
24.9008	-3.345
25.0472	-3.753
25.1937	-3.555
25.3402	-3.675
25.4867	-3.684
25.6331	-3.783
25.7796	-3.668
25.9261	-3.801
26.0726	-4.003
26.219	-4.328
26.3655	-3.75
26.512	-3.997
26.6585	-3.555
26.8049	-3.884
26.9514	-4.345
27.0979	-4.218
27.2444	-3.836
27.3908	-4.737
27.5373	-4.56
27.6838	-4.088
27.8303	-4.173
27.9767	-4.616
28.1232	-4.588
28.2697	-4.095
28.4162	-4.42
28.5626	-4.427
28.7091	-4.358
28.8556	-4.463
29.0021	-4.475
29.1485	-4.501
29.295	-4.492
29.4415	-4.573
29.588	-4.478
29.7344	-4.878
29.8809	-4.956
30.0274	-5.086
30.1739	-4.716
30.3203	-4.95
30.4668	-4.954
30.6133	-5.049
30.7598	-5.138
30.9062	-4.942
31.0527	-5.406
31.1992	-5.362
31.3457	-4.998
31.4921	-4.964
31.6386	-4.54
31.7851	-4.399
31.9316	-4.885
32.078	-5.133
32.2245	-5.062
32.371	-5.121
32.5175	-4.99
32.6639	-4.599
32.8104	-4.9
32.9569	-4.978
33.1034	-5.141
33.2498	-4.967
33.3963	-4.607
33.5428	-5.269
33.6893	-5.31
33.8357	-5.187
33.9822	-5.233
34.1287	-5.352
34.2752	-5.514
34.4216	-5.558
34.5681	-5.851
34.7146	-5.363
34.8611	-5.714
35.0075	-5.275
35.154	-5.619
35.3005	-5.879
35.447	-5.2
35.5934	-5.469
35.7399	-5.082
35.8864	-5.281
36.0329	-5.407
36.1793	-5.648
36.3258	-5.446
36.4723	-5.82
36.6188	-5.444
36.7652	-5.522
36.9117	-5.4
37.0582	-5.281
37.2047	-5.147
37.3511	-5.203
37.4976	-4.962
37.6441	-4.988
37.7906	-5.304
37.937	-5.25
38.0835	-5.264
38.23	-5.493
38.3765	-5.794
38.5229	-5.689
38.6694	-5.594
38.8159	-5.69
38.9624	-5.605
39.1088	-5.67
39.2553	-5.694
39.4018	-5.499
39.5483	-5.728
39.6947	-6.026
39.8412	-6.273
39.9877	-5.721
40.1342	-5.438
40.2806	-5.935
40.4271	-6.293
40.5736	-6.09
40.7201	-5.691
40.8665	-6.045
41.013	-5.488
41.1595	-6.233
41.306	-5.954
41.4524	-5.899
41.5989	-5.868
41.7454	-5.771
41.8919	-5.633
42.0383	-5.232
42.1848	-5.334
42.3313	-5.281
42.4778	-4.286
42.6242	-3.842
42.7707	-3.206
42.9172	-2.721
43.0637	-1.8
43.2101	-1.247
43.3566	-0.065
43.5031	1.438
43.6496	3.056
43.796	4.926
43.9425	6.456
44.089	8.428
44.2355	10.11
44.3819	11.841
44.5284	13.139
44.6749	14.427
44.8214	15.388
44.9678	16.383
45.1143	16.793
45.2608	17.386
45.4073	17.431
45.5537	16.74
45.7002	16.233
45.8467	15.592
45.9932	14.528
46.1396	13.232
46.2861	12.493
46.4326	10.942
46.5791	9.821
46.7255	8.317
46.872	6.988
47.0185	5.902
47.165	4.945
47.3114	4.216
47.4579	3.685
47.6044	3.166
47.7509	2.524
47.8973	2.197
48.0438	2.086
48.1903	1.663
48.3368	1.032
48.4832	0.448
48.6297	0.014
48.7762	-0.043
48.9227	-0.35
49.0691	-0.047
49.2156	-0.408
49.3621	-0.894
49.5086	-0.44
49.655	-0.723
49.8015	-1.07
49.948	-0.826
50.0945	-1.071
50.2409	-0.882
50.3874	-1.108
50.5339	-1.392
50.6804	-1.014
50.8268	-1.253
50.9733	-1.212
51.1198	-1.127
51.2663	-0.895
51.4127	-1.147
51.5592	-0.719
51.7057	-0.957
51.8522	-0.714
51.9986	-0.971
52.1451	-0.793
52.2916	-0.887
52.4381	-0.618
52.5845	-0.508
52.731	-0.634
52.8775	-0.35
53.024	-0.469
53.1704	-0.242
53.3169	-0.384
53.4634	0.086
53.6099	0.064
53.7563	0.364
53.9028	0.716
54.0493	1.095
54.1958	1.358
54.3422	1.925
54.4887	2.208
54.6352	2.727
54.7817	3.113
54.9281	3.928
55.0746	4.075
55.2211	5.103
55.3676	6.055
55.514	6.732
55.6605	6.787
55.807	7.684
55.9535	8.459
56.0999	8.653
56.2464	9.42
56.3929	10.587
56.5394	10.955
56.6858	11.393
56.8323	12.223
56.9788	12.778
57.1253	12.895
57.2717	12.97
57.4182	13.211
57.5647	13.519
57.7112	13.795
57.8576	14.18
58.0041	14.455
58.1506	14.458
58.2971	14.414
58.4435	14.33
58.59	15.35
58.7365	14.395
58.883	14.317
59.0294	14.884
59.1759	14.694
59.3224	14.602
59.4689	14.32
59.6153	14.177
59.7618	14.121
59.9083	14.014
60.0548	14.145
60.2012	13.807
60.3477	14.059
60.4942	13.954
60.6407	13.628
60.7871	14.217
60.9336	13.931
61.0801	13.901
61.2266	14.034
61.373	14.099
61.5195	14.275
61.666	14.342
61.8125	14.282
61.9589	14.676
62.1054	14.7
62.2519	14.677
62.3984	14.726
62.5448	15.271
62.6913	15.672
62.8378	15.705
62.9843	16.28
63.1307	16.739
63.2772	17.155
63.4237	17.844
63.5702	18.738
63.7166	19.53
63.8631	20.904
64.0096	22.725
64.1561	24.237
64.3025	26.663
64.449	28.962
64.5955	31.893
64.742	35.531
64.8884	39.696
65.0349	44.801
65.1814	50.656
65.3279	57.683
65.4743	65.378
65.6208	73.899
65.7673	83.788
65.9138	94.877
66.0602	106.75
66.2067	119.304
66.3532	132.671
66.4997	146.389
66.6461	161.2
66.7926	176.021
66.9391	190.499
67.0856	204.091
67.232	217.952
67.3785	230.376
67.525	242.821
67.6715	253.478
67.818	261.602
67.9644	268.615
68.1109	275.535
68.2574	278.638
68.4039	280.402
68.5503	280.098
68.6968	278.97
68.8433	273.356
68.9898	267.129
69.1362	260.18
69.2827	251.042
69.4292	240.937
69.5757	230.193
69.7221	219.301
69.8686	206.497
70.0151	193.84
70.1616	181.501
70.308	167.897
70.4545	156.127
70.601	143.976
70.7475	133.318
70.8939	122.61
71.0404	112.33
71.1869	101.532
71.3334	92.328
71.4798	83.048
71.6263	74.968
71.7728	67.378
71.9193	59.911
72.0657	53.511
72.2122	47.919
72.3587	41.983
72.5052	37.148
72.6516	32.32
72.7981	28.286
72.9446	24.493
73.0911	21.696
73.2375	18.698
73.384	15.727
73.5305	13.514
73.677	11.491
73.8234	9.701
73.9699	7.899
74.1164	6.591
74.2629	5.214
74.4093	4.158
74.5558	3.533
74.7023	2.545
74.8488	1.054
74.9952	0.493
75.1417	0.306
75.2882	-0.293
75.4347	-1.284
75.5811	-1.727
75.7276	-1.813
75.8741	-2.174
76.0206	-2.656
76.167	-2.524
76.3135	-2.871
76.46	-3.403
76.6065	-3.409
76.7529	-3.555
76.8994	-3.276
77.0459	-3.853
77.1924	-3.817
77.3388	-3.73
77.4853	-3.865
77.6318	-4.635
77.7783	-4.934
77.9247	-4.419
78.0712	-4.403
78.2177	-4.361
78.3642	-4.814
78.5106	-4.916
78.6571	-5.105
78.8036	-4.872
78.9501	-5.343
79.0965	-5.425
79.243	-5.495
79.3895	-5.215
79.536	-5.147
79.6824	-5.156
79.8289	-5.838
79.9754	-5.445
80.1219	-5.83
80.2683	-5.924
80.4148	-6.133
80.5613	-5.954
80.7078	-5.825
80.8542	-6.164
81.0007	-6.419
81.1472	-6.714
81.2937	-6.386
81.4401	-6.716
81.5866	-6.959
81.7331	-7.272
81.8796	-6.965
82.026	-6.988
82.1725	-7.321
82.319	-7.021
82.4655	-7.423
82.6119	-7.309
82.7584	-7.349
82.9049	-7.411
83.0514	-7.617
83.1978	-7.901
83.3443	-7.859
83.4908	-8.045
83.6373	-7.662
83.7837	-7.913
83.9302	-7.799
84.0767	-8.25
84.2232	-8.221
84.3696	-8.41
84.5161	-8.289
84.6626	-8.342
84.8091	-8.201
84.9555	-8.065
85.102	-7.992
85.2485	-8.314
85.395	-8.114
85.5414	-8.47
85.6879	-8.759
85.8344	-8.538
85.9809	-8.785
86.1273	-8.716
86.2738	-8.808
86.4203	-8.977
86.5668	-8.839
86.7132	-8.82
86.8597	-8.932
87.0062	-8.597
87.1527	-8.817
87.2991	-9.12
87.4456	-8.913
87.5921	-9.205
87.7386	-9.119
87.885	-9.054
88.0315	-8.911
88.178	-8.919
88.3245	-8.878
88.4709	-9.075
88.6174	-8.904
88.7639	-8.856
88.9104	-9.061
89.0568	-8.668
89.2033	-8.869
89.3498	-8.718
89.4963	-8.831
89.6427	-9.189
89.7892	-8.633
89.9357	-9.156
90.0822	-9.147
90.2286	-9.09
90.3751	-8.991
90.5216	-8.845
90.6681	-8.98
90.8145	-8.929
90.961	-8.991
91.1075	-9.042
91.254	-8.983
91.4004	-8.916
91.5469	-8.568
91.6934	-9.152
91.8399	-9.084
91.9863	-8.722
92.1328	-9.179
92.2793	-9.418
92.4258	-9.342
92.5722	-9.207
92.7187	-9.205
92.8652	-9.176
93.0117	-9.291
93.1581	-9.238
93.3046	-9.266
93.4511	-9.267
93.5976	-9.405
93.744	-9.475
93.8905	-9.407
94.037	-9.257
94.1835	-9.409
94.3299	-9.536
94.4764	-9.501
94.6229	-9.412
94.7694	-9.523
94.9158	-9.235
95.0623	-8.984
95.2088	-9.416
95.3553	-9.497
95.5017	-9.783
95.6482	-9.752
95.7947	-9.565
95.9412	-9.125
96.0876	-9.477
96.2341	-9.475
96.3806	-9.558
96.5271	-9.546
96.6735	-9.604
96.82	-9.309
96.9665	-8.962
97.113	-9.065
97.2594	-9.572
97.4059	-9.486
97.5524	-9.457
97.6989	-9.225
97.8453	-9.482
97.9918	-9.317
98.1383	-9.032
98.2848	-9.103
98.4312	-9.193
98.5777	-9.127
98.7242	-8.665
98.8707	-8.653
99.0171	-8.892
99.1636	-8.918
99.3101	-8.735
99.4566	-8.783
99.603	-8.84
99.7495	-8.969
99.896	-8.657
100.042	-8.944
100.189	-8.646
100.335	-8.618
100.482	-8.521
100.628	-8.828
100.775	-8.423
100.921	-8.446
101.068	-8.807
101.214	-9.127
101.361	-8.946
101.507	-8.495
101.654	-9.135
101.8	-9.016
101.947	-8.697
102.093	-9.104
102.24	-8.628
102.386	-8.757
102.533	-8.441
102.679	-8.668
102.825	-8.482
102.972	-8.319
103.118	-8.108
103.265	-7.54
103.411	-7.254
103.558	-7.097
103.704	-6.562
103.851	-5.805
103.997	-5.342
104.144	-4.891
104.29	-4.347
104.437	-3.76
104.583	-3.41
104.73	-2.555
104.876	-2.486
105.023	-1.436
105.169	-1.135
105.316	-0.329
105.462	0.126
105.609	1.043
105.755	1.804
105.901	2.963
106.048	3.706
106.194	4.634
106.341	5.379
106.487	6.728
106.634	8.143
106.78	8.706
106.927	9.292
107.073	9.78
107.22	10.296
107.366	11.114
107.513	11.149
107.659	11.225
107.806	11.161
107.952	11.631
108.099	11.665
108.245	11.557
108.392	11.519
108.538	11.773
108.684	11.676
108.831	11.971
108.977	11.485
109.124	11.6
109.27	11.452
109.417	10.968
109.563	10.445
109.71	10.22
109.856	9.762
110.003	9.193
110.149	9.073
110.296	8.457
110.442	8.086
110.589	8.074
110.735	7.762
110.882	8.05
111.028	7.25
111.175	7.544
111.321	7.22
111.468	7.174
111.614	7.157
111.76	6.709
111.907	6.34
112.053	4.999
112.2	4.417
112.346	3.391
112.493	2.446
112.639	0.973
112.786	0.084
112.932	-0.981
113.079	-1.901
113.225	-2.397
113.372	-2.614
113.518	-3.403
113.665	-3.734
113.811	-4.044
113.958	-4.279
114.104	-4.531
114.251	-4.462
114.397	-4.726
114.543	-4.881
114.69	-4.621
114.836	-4.742
114.983	-4.775
115.129	-5.107
115.276	-5.506
115.422	-5.579
115.569	-6.026
115.715	-6.593
115.862	-7.029
116.008	-7.528
116.155	-7.98
116.301	-8.534
116.448	-9.066
116.594	-9.443
116.741	-9.94
116.887	-10.548
117.034	-10.768
117.18	-11.212
117.327	-11.554
117.473	-12.411
117.619	-12.688
117.766	-12.962
117.912	-13.507
118.059	-13.799
118.205	-13.875
118.352	-14.572
118.498	-14.712
118.645	-15.489
118.791	-15.609
118.938	-15.773
119.084	-15.901
119.231	-16.054
119.377	-16.051
119.524	-15.789
119.67	-15.873
119.817	-15.713
119.963	-15.907
120.11	-15.996
120.256	-16.273
120.402	-15.586
120.549	-15.496
120.695	-15.107
120.842	-14.93
120.988	-14.817
121.135	-14.992
121.281	-14.71
121.428	-14.433
121.574	-14.293
121.721	-14.591
121.867	-14.026
122.014	-14.128
122.16	-13.894
122.307	-13.808
122.453	-14.072
122.6	-14.069
122.746	-13.957
122.893	-13.777
123.039	-14.012
123.186	-13.96
123.332	-13.683
123.478	-13.688
123.625	-14.047
123.771	-13.664
123.918	-13.986
124.064	-13.775
124.211	-13.953
124.357	-14.364
124.504	-14.132
124.65	-13.971
124.797	-13.934
124.943	-13.944
125.09	-13.966
125.236	-14.226
125.383	-14.051
125.529	-13.982
125.676	-14.225
125.822	-14.006
125.969	-14.317
126.115	-14.57
126.261	-14.884
126.408	-15.004
126.554	-15.283
126.701	-15.489
126.847	-15.912
126.994	-16.53
127.14	-17.248
127.287	-18.105
127.433	-19.061
127.58	-20.123
127.726	-20.852
127.873	-21.837
128.019	-22.875
128.166	-24.498
128.312	-25.652
128.459	-27.226
128.605	-28.141
128.752	-29.666
128.898	-31.416
129.045	-32.393
129.191	-33.471
129.337	-34.592
129.484	-35.599
129.63	-36.206
129.777	-36.707
129.923	-36.868
130.07	-36.862
130.216	-37.023
130.363	-36.668
130.509	-36.323
130.656	-36.305
130.802	-35.239
130.949	-34.449
131.095	-33.761
131.242	-32.666
131.388	-31.558
131.535	-30.568
131.681	-29.79
131.828	-28.688
131.974	-27.57
132.12	-26.769
132.267	-25.412
132.413	-24.73
132.56	-23.373
132.706	-22.75
132.853	-21.219
132.999	-20.433
133.146	-19.806
133.292	-18.751
133.439	-17.645
133.585	-17.297
133.732	-16.57
133.878	-16.206
134.025	-15.819
134.171	-15.067
134.318	-14.747
134.464	-13.782
134.611	-14.066
134.757	-13.254
134.904	-13.456
