# Supplementary material for: Complexes of vertebrate TMC1/2 and CIB2/3 proteins form hair-cell mechanotransduction cation channels
Source: eLife journal article supplement (doi:10.7554/elife.89719), 2023-08-18
Supplement: fig7-figsupp5-data1 [file 20220411qS75q16600qFWqhsTMC1MIN.xls]

## Sheet: Curves
10
S75q16600qmicroplate004qFWqhsTMC1MINq04112022:10_UV
ml	mAU
0	120.402
0.146459	85.311
0.292918	112.536
0.439377	18.73
0.585836	-22.759
0.732294	-39.647
0.878753	-45.578
1.02521	-47.477
1.17167	-48.694
1.31813	-49.202
1.46459	-48.994
1.61105	-0.658
1.75751	-1.501
1.90397	-1.544
2.05042	-1.452
2.19688	-1.515
2.34334	-1.776
2.4898	-1.968
2.63626	-1.51
2.78272	-1.979
2.92918	-1.535
3.07564	-1.626
3.2221	-1.804
3.36855	-1.993
3.51501	-1.43
3.66147	-1.683
3.80793	-1.25
3.95439	-1.318
4.10085	-0.842
4.24731	-1.194
4.39377	-1.066
4.54023	-1.221
4.68668	-0.966
4.83314	-1.25
4.9796	-1.345
5.12606	-1.183
5.27252	-0.92
5.41898	-0.685
5.56544	-1.192
5.7119	-1.036
5.85836	-0.847
6.00481	-0.738
6.15127	-0.787
6.29773	-0.615
6.44419	-0.602
6.59065	-0.709
6.73711	-0.377
6.88357	-0.133
7.03003	-0.826
7.17649	-0.52
7.32294	-0.854
7.4694	-0.538
7.61586	-0.899
7.76232	-0.626
7.90878	-0.554
8.05524	-0.961
8.2017	-0.851
8.34816	-1.082
8.49462	-0.759
8.64107	-0.9
8.78753	-1.25
8.93399	-1.067
9.08045	-1.009
9.22691	-1.105
9.37337	-1.092
9.51983	-1.046
9.66629	-0.838
9.81275	-0.896
9.9592	-1.257
10.1057	-1.157
10.2521	-1.034
10.3986	-0.885
10.545	-0.836
10.6915	-1.067
10.838	-0.61
10.9844	-0.773
11.1309	-0.835
11.2773	-0.799
11.4238	-0.834
11.5703	-1.244
11.7167	-1.02
11.8632	-1.468
12.0096	-1.183
12.1561	-1.221
12.3025	-1.18
12.449	-0.551
12.5955	-1.305
12.7419	-1.102
12.8884	-0.828
13.0348	-1.062
13.1813	-1.272
13.3278	-1.329
13.4742	-1.052
13.6207	-1.238
13.7671	-1.486
13.9136	-1.336
14.0601	-1.618
14.2065	-1.542
14.353	-1.689
14.4994	-1.634
14.6459	-1.489
14.7923	-1.884
14.9388	-1.799
15.0853	-1.776
15.2317	-1.763
15.3782	-1.764
15.5246	-2.103
15.6711	-2.039
15.8176	-2.221
15.964	-2.427
16.1105	-2.527
16.2569	-2.668
16.4034	-2.43
16.5499	-2.413
16.6963	-2.682
16.8428	-2.922
16.9892	-2.908
17.1357	-2.962
17.2821	-3.005
17.4286	-3.156
17.5751	-3.289
17.7215	-3.511
17.868	-3.62
18.0144	-3.237
18.1609	-3.466
18.3074	-3.545
18.4538	-3.62
18.6003	-3.7
18.7467	-3.758
18.8932	-3.679
19.0397	-3.407
19.1861	-3.462
19.3326	-3.35
19.479	-3.869
19.6255	-3.637
19.772	-3.705
19.9184	-3.668
20.0649	-3.489
20.2113	-3.552
20.3578	-3.662
20.5042	-3.739
20.6507	-3.301
20.7972	-4.306
20.9436	-4.012
21.0901	-4.119
21.2365	-3.878
21.383	-4.035
21.5295	-4.031
21.6759	-4.416
21.8224	-4.467
21.9688	-4.113
22.1153	-4.563
22.2618	-4.5
22.4082	-4.423
22.5547	-4.533
22.7011	-4.556
22.8476	-4.423
22.994	-4.402
23.1405	-4.013
23.287	-4.219
23.4334	-4.161
23.5799	-4.255
23.7263	-4.282
23.8728	-4.643
24.0193	-4.176
24.1657	-4.486
24.3122	-4.248
24.4586	-4.537
24.6051	-4.38
24.7516	-4.511
24.898	-4.566
25.0445	-4.898
25.1909	-4.506
25.3374	-4.407
25.4838	-4.303
25.6303	-4.298
25.7768	-4.79
25.9232	-4.651
26.0697	-4.735
26.2161	-4.607
26.3626	-4.689
26.5091	-4.436
26.6555	-4.425
26.802	-4.445
26.9484	-4.664
27.0949	-5.014
27.2414	-4.79
27.3878	-4.524
27.5343	-4.919
27.6807	-5.179
27.8272	-4.645
27.9736	-4.756
28.1201	-4.418
28.2666	-4.137
28.413	-4.842
28.5595	-4.531
28.7059	-4.573
28.8524	-4.733
28.9989	-4.396
29.1453	-4.768
29.2918	-4.536
29.4382	-4.851
29.5847	-4.863
29.7312	-4.817
29.8776	-4.687
30.0241	-4.613
30.1705	-4.775
30.317	-4.728
30.4634	-4.61
30.6099	-4.848
30.7564	-4.729
30.9028	-4.563
31.0493	-4.822
31.1957	-4.797
31.3422	-4.908
31.4887	-4.722
31.6351	-4.897
31.7816	-4.631
31.928	-4.741
32.0745	-4.642
32.221	-4.521
32.3674	-4.459
32.5139	-4.337
32.6603	-4.586
32.8068	-4.509
32.9533	-4.147
33.0997	-4.412
33.2462	-4.279
33.3926	-4.231
33.5391	-4.413
33.6855	-4.452
33.832	-4.615
33.9785	-4.464
34.1249	-4.245
34.2714	-4.25
34.4178	-4.15
34.5643	-4.434
34.7108	-4.605
34.8572	-4.468
35.0037	-4.328
35.1501	-4.649
35.2966	-4.305
35.4431	-4.705
35.5895	-4.698
35.736	-4.485
35.8824	-4.478
36.0289	-4.66
36.1753	-4.419
36.3218	-4.455
36.4683	-4.497
36.6147	-4.83
36.7612	-4.865
36.9076	-4.716
37.0541	-4.738
37.2006	-4.405
37.347	-4.544
37.4935	-4.515
37.6399	-4.721
37.7864	-4.925
37.9329	-4.798
38.0793	-4.737
38.2258	-5.006
38.3722	-4.984
38.5187	-4.838
38.6651	-5.208
38.8116	-5.112
38.9581	-5.166
39.1045	-5.194
39.251	-5.208
39.3974	-5.537
39.5439	-5.11
39.6904	-5.436
39.8368	-5.64
39.9833	-5.016
40.1297	-5.143
40.2762	-5.502
40.4227	-5.235
40.5691	-5.385
40.7156	-5.272
40.862	-5.275
41.0085	-5.684
41.1549	-5.228
41.3014	-5.548
41.4479	-5.47
41.5943	-5.285
41.7408	-5.409
41.8872	-5.192
42.0337	-4.841
42.1802	-4.508
42.3266	-4.551
42.4731	-4.364
42.6195	-4.196
42.766	-3.783
42.9125	-3.368
43.0589	-3.024
43.2054	-2.474
43.3518	-1.511
43.4983	-0.363
43.6447	1.724
43.7912	4.88
43.9377	9.541
44.0841	14.765
44.2306	19.86
44.377	23.627
44.5235	26.563
44.67	27.552
44.8164	27.381
44.9629	26.149
45.1093	24.541
45.2558	22.18
45.4023	19.652
45.5487	17.301
45.6952	15.103
45.8416	12.789
45.9881	11.336
46.1346	9.975
46.281	8.965
46.4275	8.261
46.5739	7.384
46.7204	6.896
46.8668	5.985
47.0133	5.399
47.1598	5.172
47.3062	4.773
47.4527	4.659
47.5991	4.337
47.7456	4.41
47.8921	4.211
48.0385	3.915
48.185	4.203
48.3314	3.668
48.4779	3.296
48.6244	3.048
48.7708	3.162
48.9173	3.014
49.0637	3.507
49.2102	3.471
49.3566	3.744
49.5031	3.559
49.6496	3.782
49.796	3.54
49.9425	3.675
50.0889	3.598
50.2354	3.733
50.3819	3.916
50.5283	3.774
50.6748	3.633
50.8212	4.284
50.9677	4.271
51.1142	4.2
51.2606	4.722
51.4071	4.694
51.5535	4.718
51.7	4.819
51.8464	5.16
51.9929	5.157
52.1394	5.484
52.2858	5.937
52.4323	6.375
52.5787	6.246
52.7252	6.31
52.8717	6.618
53.0181	6.814
53.1646	6.798
53.311	6.793
53.4575	6.872
53.604	7.367
53.7504	7.581
53.8969	7.527
54.0433	7.5
54.1898	7.954
54.3362	8.032
54.4827	8.177
54.6292	7.988
54.7756	8.321
54.9221	8.409
55.0685	8.335
55.215	8.577
55.3615	8.305
55.5079	8.711
55.6544	8.635
55.8008	8.822
55.9473	8.648
56.0938	8.476
56.2402	8.502
56.3867	8.343
56.5331	8.467
56.6796	8.304
56.8261	8.517
56.9725	8.594
57.119	8.331
57.2654	8.242
57.4119	8.172
57.5583	8.343
57.7048	8.359
57.8513	8.402
57.9977	8.679
58.1442	8.667
58.2906	8.447
58.4371	8.573
58.5836	8.855
58.73	8.873
58.8765	8.657
59.0229	8.842
59.1694	9.005
59.3159	9.08
59.4623	8.964
59.6088	9.094
59.7552	8.994
59.9017	8.958
60.0481	9.143
60.1946	8.856
60.3411	8.623
60.4875	8.019
60.634	7.809
60.7804	7.494
60.9269	7.438
61.0734	6.894
61.2198	6.353
61.3663	5.906
61.5127	5.7
61.6592	5.335
61.8057	5.057
61.9521	4.734
62.0986	4.62
62.245	4.123
62.3915	3.934
62.5379	3.706
62.6844	3.479
62.8309	3.558
62.9773	3.754
63.1238	3.61
63.2702	3.591
63.4167	3.732
63.5632	3.936
63.7096	4.089
63.8561	4.62
64.0025	4.385
64.149	4.554
64.2955	4.2
64.4419	4.598
64.5884	4.613
64.7348	4.718
64.8813	4.812
65.0277	4.565
65.1742	4.74
65.3207	4.749
65.4671	4.598
65.6136	4.469
65.76	4.045
65.9065	3.911
66.053	3.783
66.1994	3.73
66.3459	3.421
66.4923	3.101
66.6388	2.56
66.7853	2.427
66.9317	2.154
67.0782	2.111
67.2246	1.626
67.3711	1.306
67.5175	1.148
67.664	1.108
67.8105	0.902
67.9569	0.926
68.1034	1.07
68.2498	0.719
68.3963	0.592
68.5428	0.424
68.6892	0.532
68.8357	0.241
68.9821	-0.251
69.1286	-0.143
69.2751	-0.294
69.4215	-0.656
69.568	-0.561
69.7144	-0.635
69.8609	-0.705
70.0074	-0.596
70.1538	-0.901
70.3003	-0.823
70.4467	-1.23
70.5932	-1.031
70.7396	-0.805
70.8861	-0.934
71.0326	-0.595
71.179	-0.363
71.3255	0.122
71.4719	0.465
71.6184	0.975
71.7649	1.963
71.9113	2.935
72.0578	4.498
72.2042	6.17
72.3507	8.4
72.4972	10.763
72.6436	13.874
72.7901	17.428
72.9365	21.46
73.083	25.986
73.2294	31.416
73.3759	36.323
73.5224	42.955
73.6688	49.87
73.8153	56.499
73.9617	64.043
74.1082	71.829
74.2547	79.784
74.4011	87.147
74.5476	94.461
74.694	101.448
74.8405	108.018
74.987	114.324
75.1334	119.554
75.2799	123.473
75.4263	126.512
75.5728	128.84
75.7192	129.723
75.8657	129.682
76.0122	128.824
76.1586	127.266
76.3051	123.824
76.4515	120.465
76.598	115.784
76.7445	110.458
76.8909	106.16
77.0374	99.767
77.1838	94.099
77.3303	88.598
77.4768	82.195
77.6232	76.674
77.7697	71.349
77.9161	65.887
78.0626	60.594
78.209	55.964
78.3555	51.093
78.502	46.832
78.6484	42.59
78.7949	38.783
78.9413	35.374
79.0878	32.668
79.2343	29.373
79.3807	26.75
79.5272	23.848
79.6736	21.651
79.8201	19.411
79.9666	17.663
80.113	16.262
80.2595	14.483
80.4059	12.76
80.5524	11.449
80.6988	10.269
80.8453	9.464
80.9918	8.34
81.1382	7.156
81.2847	6.694
81.4311	5.724
81.5776	5.302
81.7241	4.519
81.8705	3.909
82.017	3.697
82.1634	3.143
82.3099	2.874
82.4564	2.846
82.6028	2.243
82.7493	1.95
82.8957	1.617
83.0422	2.094
83.1887	1.495
83.3351	1.143
83.4816	1.145
83.628	1.473
83.7745	0.67
83.9209	1.059
84.0674	0.765
84.2139	0.872
84.3603	0.301
84.5068	0.614
84.6532	0.272
84.7997	0.422
84.9462	0.075
85.0926	-0.116
85.2391	-0.009
85.3855	0.137
85.532	-0.1
85.6785	-0.31
85.8249	-0.525
85.9714	-0.236
86.1178	-0.207
86.2643	-0.256
86.4107	-0.61
86.5572	-0.605
86.7037	-0.44
86.8501	-0.565
86.9966	-0.666
87.143	-0.77
87.2895	-0.733
87.436	-0.801
87.5824	-0.764
87.7289	-0.343
87.8753	-0.698
88.0218	-0.681
88.1683	-0.957
88.3147	-1.093
88.4612	-1.347
88.6076	-0.887
88.7541	-1.002
88.9005	-1.06
89.047	-1.249
89.1935	-1.165
89.3399	-1.307
89.4864	-1.069
89.6328	-0.926
89.7793	-1.522
89.9258	-1.471
90.0722	-1.186
90.2187	-1.175
90.3651	-1.197
90.5116	-1.067
90.6581	-1.181
90.8045	-1.294
90.951	-1.743
91.0974	-1.832
91.2439	-1.556
91.3903	-1.769
91.5368	-1.876
91.6833	-1.817
91.8297	-2.053
91.9762	-1.929
92.1226	-1.75
92.2691	-1.866
92.4156	-1.772
92.562	-2.195
92.7085	-1.83
92.8549	-2.077
93.0014	-2.114
93.1479	-1.987
93.2943	-1.878
93.4408	-1.891
93.5872	-1.757
93.7337	-1.726
93.8802	-1.838
94.0266	-1.814
94.1731	-1.561
94.3195	-1.852
94.466	-2.113
94.6124	-2.231
94.7589	-2.086
94.9054	-1.964
95.0518	-2.25
95.1983	-2.155
95.3447	-2.32
95.4912	-2.279
95.6377	-2.217
95.7841	-2.568
95.9306	-2.552
96.077	-2.464
96.2235	-2.539
96.37	-2.625
96.5164	-2.62
96.6629	-2.578
96.8093	-2.894
96.9558	-2.783
97.1022	-2.516
97.2487	-2.754
97.3952	-2.873
97.5416	-3.325
97.6881	-3.554
97.8345	-3.372
97.981	-3.626
98.1275	-3.845
98.2739	-3.652
98.4204	-3.606
98.5668	-4.037
98.7133	-3.944
98.8598	-3.785
99.0062	-4.033
99.1527	-3.887
99.2991	-3.945
99.4456	-4.161
99.592	-4.462
99.7385	-4.29
99.885	-4.678
100.031	-4.433
100.178	-4.615
100.324	-5.083
100.471	-5.342
100.617	-5.675
100.764	-6.236
100.91	-6.422
101.057	-6.98
101.203	-7.393
101.35	-7.871
101.496	-8.137
101.642	-8.691
101.789	-9.112
101.935	-9.82
102.082	-9.704
102.228	-10.43
102.375	-10.822
102.521	-10.84
102.668	-11.817
102.814	-12.075
102.961	-12.684
103.107	-13.424
103.254	-13.887
103.4	-14.415
103.546	-15.28
103.693	-15.956
103.839	-16.907
103.986	-17.442
104.132	-18.452
104.279	-19.086
104.425	-19.99
104.572	-20.336
104.718	-20.968
104.865	-21.714
105.011	-22.369
105.157	-22.837
105.304	-22.88
105.45	-23.445
105.597	-23.784
105.743	-24.247
105.89	-24.603
106.036	-24.667
106.183	-24.609
106.329	-25.252
106.476	-25.314
106.622	-24.971
106.769	-25.051
106.915	-25.145
107.061	-24.864
107.208	-24.9
107.354	-25.09
107.501	-25.215
107.647	-24.777
107.794	-24.188
107.94	-24.21
108.087	-23.532
108.233	-23.647
108.38	-23.212
108.526	-23.257
108.672	-23.018
108.819	-23.39
108.965	-22.859
109.112	-22.323
109.258	-20.8
109.405	-18.696
109.551	-16.095
109.698	-13.414
109.844	-11.2
109.991	-8.901
110.137	-6.449
110.284	-4.147
110.43	-2.098
110.576	-0.245
110.723	1.679
110.869	3.193
111.016	4.766
111.162	6.19
111.309	7.427
111.455	8.356
111.602	9.42
111.748	10.787
111.895	11.118
112.041	12.072
112.188	13.153
112.334	13.576
112.48	14.027
112.627	14.627
112.773	14.949
112.92	15.037
113.066	15.569
113.213	15.753
113.359	15.942
113.506	16.009
113.652	16.098
113.799	16.064
113.945	15.887
114.091	16.059
114.238	15.998
114.384	15.274
114.531	15.202
114.677	15.19
114.824	14.834
114.97	14.601
115.117	14.285
115.263	13.947
115.41	14.268
115.556	13.644
115.703	13.163
115.849	12.946
115.995	12.492
116.142	11.938
116.288	11.322
116.435	10.947
116.581	10.252
116.728	9.768
116.874	9.245
117.021	8.941
117.167	7.958
117.314	7.526
117.46	6.98
117.606	6.805
117.753	6.925
117.899	6.664
118.046	6.581
118.192	7.058
118.339	7.452
118.485	8.162
118.632	8.815
118.778	10.176
118.925	11.406
119.071	13.301
119.218	14.548
119.364	16.329
119.51	17.883
119.657	20.194
119.803	22.843
119.95	24.805
120.096	27.202
120.243	29.671
120.389	32.409
120.536	35.069
120.682	37.806
120.829	40.871
120.975	43.807
121.122	46.528
121.268	49.21
121.414	51.841
121.561	53.921
121.707	55.943
121.854	57.116
122	57.699
122.147	57.093
122.293	55.633
122.44	52.889
122.586	50.216
122.733	46.864
122.879	43.962
123.025	41.304
123.172	38.478
123.318	36.045
123.465	33.039
123.611	30.812
123.758	28.337
123.904	25.858
124.051	23.596
124.197	21.05
124.344	19.387
124.49	17.616
124.637	15.031
124.783	13.53
124.929	12.008
125.076	10.771
125.222	9.459
125.369	8.456
125.515	7.427
125.662	6.817
125.808	5.958
125.955	5.432
126.101	4.628
126.248	4.793
126.394	4.387
126.54	4.091
126.687	4.456
126.833	4.389
126.98	4.471
127.126	4.589
127.273	4.796
127.419	5.307
127.566	5.259
127.712	5.67
127.859	5.891
128.005	6.055
128.152	6.505
128.298	7.023
128.444	7.751
128.591	8.679
128.737	9.517
128.884	10.414
129.03	11.494
129.177	12.823
129.323	14.905
129.47	16.971
129.616	18.738
129.763	20.595
129.909	23.251
130.055	25.618
130.202	27.781
130.348	30.776
130.495	32.949
130.641	35.42
130.788	37.891
130.934	40.409
131.081	42.313
131.227	44.389
131.374	46.606
131.52	47.904
131.667	49.726
131.813	50.539
131.959	52.051
132.106	53.351
132.252	53.711
132.399	53.993
132.545	55.358
132.692	55.42
132.838	55.699
132.985	55.91
133.131	55.92
133.278	55.952
133.424	55.856
133.571	55.319
133.717	55.03
133.863	54.405
