# Supplementary material for: Complexes of vertebrate TMC1/2 and CIB2/3 proteins form hair-cell mechanotransduction cation channels
Source: eLife journal article supplement (doi:10.7554/elife.89719), 2023-08-18
Supplement: fig7-figsupp5-data1 [file 20220415qS75q16600qFWqhsCIB3KozDel.xls]

## Sheet: Curves
10
S75q16600qmicroplate004qFWqhsCIB3KozDelq04152022:10_UV
ml	mAU
0	111.88
0.142287	-2.752
0.284573	-6.313
0.42686	-5.838
0.569146	-6.229
0.711433	-6.656
0.85372	-7.253
0.996006	-6.814
1.13829	-6.962
1.28058	-6.806
1.42287	-7.165
1.56515	-6.926
1.70744	-6.71
1.84973	-6.887
1.99201	-6.659
2.1343	-6.683
2.27659	-6.671
2.41887	-6.627
2.56116	-6.574
2.70345	-6.321
2.84573	-6.641
2.98802	-6.588
3.13031	-6.544
3.27259	-6.385
3.41488	-6.365
3.55717	-6.242
3.69945	-6.408
3.84174	-6.602
3.98403	-6.242
4.12631	-6.054
4.2686	-6.001
4.41089	-6.444
4.55317	-6.121
4.69546	-6.489
4.83774	-6.006
4.98003	-5.912
5.12232	-5.979
5.2646	-5.81
5.40689	-6.041
5.54918	-6.078
5.69146	-6.277
5.83375	-6.174
5.97604	-5.923
6.11832	-5.567
6.26061	-5.996
6.4029	-6.475
6.54518	-6.139
6.68747	-6.238
6.82976	-6.215
6.97204	-6.136
7.11433	-6.13
7.25662	-6.383
7.3989	-6.373
7.54119	-6.018
7.68348	-6.207
7.82576	-5.726
7.96805	-5.648
8.11034	-5.563
8.25262	-6.083
8.39491	-5.713
8.5372	-5.433
8.67948	-5.714
8.82177	-5.765
8.96406	-5.742
9.10634	-5.975
9.24863	-5.911
9.39092	-5.596
9.5332	-5.613
9.67549	-5.686
9.81778	-5.104
9.96006	-5.438
10.1023	-5.479
10.2446	-5.296
10.3869	-5.112
10.5292	-5.689
10.6715	-4.779
10.8138	-4.977
10.9561	-4.948
11.0984	-5.103
11.2406	-5.031
11.3829	-5.372
11.5252	-5.246
11.6675	-5.587
11.8098	-5.579
11.9521	-5.831
12.0944	-5.63
12.2366	-5.875
12.3789	-5.509
12.5212	-6.01
12.6635	-6.099
12.8058	-5.888
12.9481	-5.245
13.0904	-5.298
13.2327	-4.733
13.3749	-5.718
13.5172	-5.647
13.6595	-5.847
13.8018	-5.604
13.9441	-5.848
14.0864	-5.283
14.2287	-5.386
14.3709	-5.606
14.5132	-5.589
14.6555	-6.171
14.7978	-6.019
14.9401	-5.953
15.0824	-5.485
15.2247	-5.714
15.367	-5.364
15.5092	-5.159
15.6515	-5.3
15.7938	-5.358
15.9361	-5.354
16.0784	-5.251
16.2207	-5.521
16.363	-5.235
16.5052	-5.445
16.6475	-5.361
16.7898	-5.173
16.9321	-5.323
17.0744	-5.264
17.2167	-5.253
17.359	-5.437
17.5013	-5.409
17.6435	-5.342
17.7858	-4.797
17.9281	-4.844
18.0704	-5.325
18.2127	-5.119
18.355	-5.77
18.4973	-5.844
18.6395	-5.82
18.7818	-5.534
18.9241	-5.708
19.0664	-5.765
19.2087	-5.947
19.351	-5.938
19.4933	-5.829
19.6356	-5.602
19.7778	-5.876
19.9201	-6.218
20.0624	-5.888
20.2047	-5.871
20.347	-6.072
20.4893	-5.236
20.6316	-5.644
20.7738	-5.785
20.9161	-5.383
21.0584	-5.957
21.2007	-5.506
21.343	-5.742
21.4853	-5.892
21.6276	-6.441
21.7699	-6.218
21.9121	-6.04
22.0544	-6.125
22.1967	-5.618
22.339	-5.893
22.4813	-5.685
22.6236	-5.612
22.7659	-5.211
22.9081	-5.424
23.0504	-5.532
23.1927	-5.003
23.335	-4.953
23.4773	-5.272
23.6196	-5.004
23.7619	-5.235
23.9042	-5.044
24.0464	-5.024
24.1887	-5.141
24.331	-5.285
24.4733	-4.893
24.6156	-4.935
24.7579	-4.582
24.9002	-5.27
25.0424	-4.707
25.1847	-4.642
25.327	-4.421
25.4693	-4.6
25.6116	-4.436
25.7539	-4.415
25.8962	-4.825
26.0385	-4.395
26.1807	-4.529
26.323	-4.905
26.4653	-4.814
26.6076	-4.973
26.7499	-4.893
26.8922	-5.027
27.0345	-4.667
27.1767	-4.398
27.319	-4.718
27.4613	-4.891
27.6036	-4.805
27.7459	-4.386
27.8882	-4.937
28.0305	-4.835
28.1728	-4.609
28.315	-4.687
28.4573	-4.424
28.5996	-4.561
28.7419	-4.771
28.8842	-4.968
29.0265	-4.884
29.1688	-4.693
29.311	-4.589
29.4533	-4.515
29.5956	-4.568
29.7379	-4.674
29.8802	-4.952
30.0225	-5.173
30.1648	-5.31
30.307	-4.823
30.4493	-4.769
30.5916	-4.575
30.7339	-5.048
30.8762	-4.914
31.0185	-5.182
31.1608	-4.481
31.3031	-5.199
31.4453	-5.157
31.5876	-4.989
31.7299	-4.613
31.8722	-4.766
32.0145	-5.03
32.1568	-5.124
32.2991	-5.15
32.4413	-4.907
32.5836	-4.973
32.7259	-4.676
32.8682	-4.979
33.0105	-4.647
33.1528	-4.514
33.2951	-4.333
33.4374	-4.041
33.5796	-4.614
33.7219	-4.123
33.8642	-4.173
34.0065	-4.122
34.1488	-3.813
34.2911	-3.993
34.4334	-3.924
34.5756	-3.286
34.7179	-3.823
34.8602	-3.57
35.0025	-3.474
35.1448	-3.418
35.2871	-3.822
35.4294	-3.574
35.5717	-3.751
35.7139	-4.046
35.8562	-3.952
35.9985	-4.023
36.1408	-3.803
36.2831	-4.264
36.4254	-4.301
36.5677	-4.333
36.7099	-4.427
36.8522	-4.447
36.9945	-4.246
37.1368	-3.564
37.2791	-3.554
37.4214	-3.753
37.5637	-3.749
37.706	-3.62
37.8482	-4.156
37.9905	-3.945
38.1328	-3.938
38.2751	-3.99
38.4174	-3.813
38.5597	-4.158
38.702	-4.274
38.8442	-4.497
38.9865	-4.418
39.1288	-4.404
39.2711	-4.47
39.4134	-4.283
39.5557	-4.459
39.698	-4.411
39.8403	-4.59
39.9825	-4.644
40.1248	-4.388
40.2671	-4.284
40.4094	-4.587
40.5517	-4.244
40.694	-4.058
40.8363	-3.989
40.9785	-3.218
41.1208	-2.752
41.2631	-1.842
41.4054	-1.164
41.5477	-0.193
41.69	1.882
41.8323	3.74
41.9746	5.932
42.1168	8.843
42.2591	11.572
42.4014	15.266
42.5437	18.946
42.686	23.677
42.8283	28.765
42.9706	34.083
43.1128	40.441
43.2551	47.046
43.3974	54.072
43.5397	61.768
43.682	69.691
43.8243	76.838
43.9666	85.028
44.1089	92.36
44.2511	99.05
44.3934	102.597
44.5357	106.166
44.678	108.13
44.8203	108.712
44.9626	107.215
45.1049	104.798
45.2471	101.34
45.3894	96.584
45.5317	91.004
45.674	85.375
45.8163	79.046
45.9586	72.813
46.1009	66.334
46.2432	60.375
46.3854	54.569
46.5277	48.411
46.67	43.945
46.8123	38.673
46.9546	35.145
47.0969	31.284
47.2392	28.205
47.3814	25.727
47.5237	22.93
47.666	20.572
47.8083	18.757
47.9506	16.67
48.0929	14.882
48.2352	13.756
48.3774	12.124
48.5197	10.985
48.662	9.73
48.8043	8.664
48.9466	7.708
49.0889	6.939
49.2312	5.947
49.3735	5.57
49.5157	4.545
49.658	4.231
49.8003	3.954
49.9426	3.335
50.0849	2.97
50.2272	2.317
50.3695	2.199
50.5117	1.521
50.654	2.167
50.7963	1.419
50.9386	1.3
51.0809	1.112
51.2232	1.181
51.3655	0.655
51.5078	0.96
51.65	0.851
51.7923	0.933
51.9346	0.486
52.0769	0.551
52.2192	0.628
52.3615	0.341
52.5038	0.542
52.646	0.907
52.7883	0.244
52.9306	0.528
53.0729	0.311
53.2152	0.213
53.3575	-0.019
53.4998	-0.005
53.6421	0.025
53.7843	0.076
53.9266	-0.09
54.0689	-0.101
54.2112	0.12
54.3535	0.18
54.4958	-0.284
54.6381	-0.446
54.7803	-0.28
54.9226	0.002
55.0649	-0.291
55.2072	0.126
55.3495	-0.209
55.4918	-0.454
55.6341	-0.15
55.7764	-0.338
55.9186	-0.053
56.0609	-0.088
56.2032	-0.222
56.3455	0.011
56.4878	0.129
56.6301	-0.156
56.7724	-0.015
56.9146	-0.056
57.0569	0.267
57.1992	0.108
57.3415	0.864
57.4838	0.625
57.6261	0.548
57.7684	0.191
57.9107	0.765
58.0529	0.668
58.1952	0.861
58.3375	1.213
58.4798	1.736
58.6221	1.411
58.7644	2.031
58.9067	2.834
59.0489	3.529
59.1912	4.862
59.3335	6.488
59.4758	7.76
59.6181	9.537
59.7604	11.919
59.9027	14.296
60.045	17.238
60.1872	20.766
60.3295	24.996
60.4718	29.041
60.6141	34.207
60.7564	39.046
60.8987	44.531
61.041	50.217
61.1832	55.734
61.3255	60.381
61.4678	65.026
61.6101	70.02
61.7524	73.697
61.8947	78.282
62.037	81.514
62.1793	84.517
62.3215	86.477
62.4638	88.017
62.6061	88.575
62.7484	89.26
62.8907	89.176
63.033	87.597
63.1753	87.061
63.3175	85.106
63.4598	82.914
63.6021	80.697
63.7444	78.376
63.8867	75.021
64.029	71.896
64.1713	68.865
64.3136	65.541
64.4558	62
64.5981	58.362
64.7404	55.302
64.8827	51.924
65.025	48.883
65.1673	45.724
65.3096	42.549
65.4518	39.341
65.5941	37.494
65.7364	34.967
65.8787	32.793
66.021	30.695
66.1633	28.818
66.3056	26.827
66.4479	25.932
66.5901	24.446
66.7324	23.057
66.8747	21.999
67.017	21.272
67.1593	20.406
67.3016	20.008
67.4439	19.217
67.5861	18.217
67.7284	17.957
67.8707	17.577
68.013	18.674
68.1553	18.501
68.2976	18.003
68.4399	17.445
68.5821	17.192
68.7244	17.105
68.8667	17.54
69.009	18.105
69.1513	19.132
69.2936	19.119
69.4359	19.369
69.5782	19.89
69.7204	20.758
69.8627	21.717
70.005	22.274
70.1473	23.092
70.2896	24.586
70.4319	25.258
70.5742	26.674
70.7164	28.42
70.8587	30.615
71.001	31.853
71.1433	33.916
71.2856	36.014
71.4279	37.979
71.5702	39.199
71.7125	41.475
71.8547	42.796
71.997	44.013
72.1393	45.739
72.2816	46.482
72.4239	47.185
72.5662	47.758
72.7085	48.478
72.8507	48.998
72.993	49.087
73.1353	48.902
73.2776	48.3
73.4199	46.822
73.5622	46.034
73.7045	45.097
73.8468	43.528
73.989	41.909
74.1313	40.802
74.2736	38.742
74.4159	37.254
74.5582	35.293
74.7005	33.553
74.8428	31.259
74.985	29.477
75.1273	27.632
75.2696	25.776
75.4119	24.309
75.5542	22.45
75.6965	20.85
75.8388	18.728
75.9811	17.581
76.1233	16.182
76.2656	14.788
76.4079	13.88
76.5502	12.691
76.6925	11.252
76.8348	10.408
76.9771	9.443
77.1193	8.602
77.2616	7.946
77.4039	7.421
77.5462	6.664
77.6885	6.379
77.8308	5.985
77.9731	5.394
78.1154	5.037
78.2576	4.531
78.3999	4.164
78.5422	4.014
78.6845	3.634
78.8268	3.844
78.9691	3.094
79.1114	2.955
79.2536	2.411
79.3959	2.522
79.5382	2.539
79.6805	2.363
79.8228	2.014
79.9651	2.108
80.1074	2.162
80.2497	1.921
80.3919	1.399
80.5342	1.436
80.6765	1.683
80.8188	1.494
80.9611	1.009
81.1034	0.83
81.2457	0.533
81.3879	0.876
81.5302	0.706
81.6725	0.571
81.8148	0.308
81.9571	0.614
82.0994	0.516
82.2417	0.886
82.384	0.638
82.5262	0.482
82.6685	0.465
82.8108	0.166
82.9531	0.353
83.0954	0.06
83.2377	-0.001
83.38	-0.196
83.5222	0.332
83.6645	0.084
83.8068	0.119
83.9491	0.058
84.0914	0.003
84.2337	0.138
84.376	0.422
84.5183	0.393
84.6605	-0.164
84.8028	-0.069
84.9451	0.235
85.0874	0.328
85.2297	0.34
85.372	0.463
85.5143	0.457
85.6565	0.41
85.7988	0.094
85.9411	-0.145
86.0834	-0.227
86.2257	0.201
86.368	0.305
86.5103	0.363
86.6526	-0.11
86.7948	0.188
86.9371	0.105
87.0794	0.183
87.2217	-0.361
87.364	-0.33
87.5063	-0.134
87.6486	-0.225
87.7908	-0.373
87.9331	-0.122
88.0754	-0.421
88.2177	-0.204
88.36	-0.174
88.5023	-0.226
88.6446	-0.198
88.7868	-0.123
88.9291	-0.067
89.0714	0.313
89.2137	-0.034
89.356	0.013
89.4983	0.187
89.6406	0.16
89.7829	0.137
89.9251	0.402
90.0674	0.156
90.2097	0.195
90.352	0.458
90.4943	0.36
90.6366	0.082
90.7789	0.362
90.9211	0.088
91.0634	-0.206
91.2057	-0.316
91.348	-0.22
91.4903	0.252
91.6326	-0.025
91.7749	-0.121
91.9172	-0.28
92.0594	-0.319
92.2017	-0.186
92.344	-0.068
92.4863	-0.191
92.6286	-0.074
92.7709	0.096
92.9132	-0.044
93.0554	-0.417
93.1977	-0.508
93.34	0.066
93.4823	-0.161
93.6246	0.223
93.7669	-0.12
93.9092	-0.496
94.0515	-0.123
94.1937	-0.332
94.336	-0.251
94.4783	-0.049
94.6206	0.128
94.7629	-0.255
94.9052	-0.126
95.0475	-0.075
95.1897	-0.219
95.332	-0.23
95.4743	-0.822
95.6166	-0.851
95.7589	-0.221
95.9012	-0.281
96.0435	-0.677
96.1858	-0.635
96.328	-0.05
96.4703	-0.439
96.6126	-0.446
96.7549	-0.682
96.8972	-0.344
97.0395	-0.527
97.1818	-0.47
97.324	-0.416
97.4663	-0.288
97.6086	-0.257
97.7509	-0.243
97.8932	-0.567
98.0355	0.018
98.1778	-0.092
98.3201	-0.327
98.4623	-0.264
98.6046	-0.218
98.7469	-0.406
98.8892	-0.647
99.0315	-0.05
99.1738	0.359
99.3161	0.075
99.4583	-0.03
99.6006	-0.131
99.7429	-0.182
99.8852	-0.338
100.027	0.034
100.17	-0.198
100.312	-0.245
100.454	-0.214
100.597	-0.631
100.739	-0.665
100.881	-0.766
101.023	-0.696
101.166	-1.034
101.308	-1.46
101.45	-2.148
101.593	-2.435
101.735	-2.868
101.877	-2.804
102.02	-2.741
102.162	-2.743
102.304	-2.752
102.446	-2.838
102.589	-2.375
102.731	-2.191
102.873	-1.879
103.016	-1.319
103.158	-1.266
103.3	-0.319
103.442	-0.145
103.585	0.482
103.727	1.253
103.869	1.746
104.012	2.411
104.154	3.171
104.296	4.314
104.438	4.442
104.581	5.05
104.723	5.767
104.865	6.814
105.008	7.118
105.15	7.827
105.292	8.975
105.434	9.159
105.577	10.097
105.719	10.725
105.861	11.335
106.004	12.518
106.146	13.078
106.288	14.133
106.43	15.211
106.573	15.885
106.715	16.79
106.857	17.803
107	18.493
107.142	19.536
107.284	20.98
107.426	21.128
107.569	22.036
107.711	22.624
107.853	22.741
107.996	23.158
108.138	23.448
108.28	23.76
108.422	24.278
108.565	24.587
108.707	24.317
108.849	23.997
108.992	24.073
109.134	24.53
109.276	24.225
109.418	24.497
109.561	24.065
109.703	24.328
109.845	23.899
109.988	24.669
110.13	24.458
110.272	24.617
110.414	24.667
110.557	24.484
110.699	24.722
110.841	25.561
110.984	25.677
111.126	25.688
111.268	25.746
111.41	25.598
111.553	25.502
111.695	25.493
111.837	24.961
111.98	24.478
112.122	24.423
112.264	23.795
112.406	23.638
112.549	23.151
112.691	22.926
112.833	22.718
112.976	22.445
113.118	21.589
113.26	21.438
113.402	21.065
113.545	20.059
113.687	19.277
113.829	17.616
113.972	16.523
114.114	15.102
114.256	14.138
114.398	13.377
114.541	12.843
114.683	12.77
114.825	12.623
114.968	12.782
115.11	12.455
115.252	12.167
115.394	12.163
115.537	11.749
115.679	11.486
115.821	11.343
115.964	11.108
116.106	11.131
116.248	10.948
116.39	10.064
116.533	9.274
116.675	8.847
116.817	8.071
116.96	7.81
117.102	6.904
117.244	5.999
117.386	5.067
117.529	3.982
117.671	3.249
117.813	1.544
117.956	0.762
118.098	-0.564
118.24	-1.658
118.382	-2.083
118.525	-3.668
118.667	-4.002
118.809	-4.896
118.952	-5.641
119.094	-6.195
119.236	-6.311
119.378	-7.014
119.521	-7.193
119.663	-7.447
119.805	-7.788
119.948	-7.955
120.09	-7.451
120.232	-7.385
120.374	-6.762
120.517	-6.3
120.659	-5.558
120.801	-5.845
120.944	-5.376
121.086	-4.158
121.228	-4.116
121.37	-3.779
121.513	-3.396
121.655	-3.368
121.797	-2.252
121.94	-2.378
122.082	-1.507
122.224	-1.811
122.366	-1.294
122.509	-1.342
122.651	-1.167
122.793	-1.096
122.936	-0.719
123.078	-0.482
123.22	-0.175
123.362	-0.069
123.505	-0.263
123.647	-0.011
123.789	0.102
123.932	-0.124
124.074	0.403
124.216	-0.008
124.359	0.207
124.501	0.501
124.643	-0.081
124.785	-0.246
124.928	-0.788
125.07	-0.771
125.212	-0.088
125.355	-0.323
125.497	-0.895
125.639	-1.179
125.781	-1.537
125.924	-2.53
126.066	-3.128
126.208	-3.88
126.351	-5.094
126.493	-5.733
126.635	-7.332
126.777	-8.877
126.92	-10.594
127.062	-12.66
127.204	-14.902
127.347	-17.294
127.489	-19.786
127.631	-22.701
127.773	-25.793
127.916	-29.113
128.058	-31.797
128.2	-35.604
128.343	-39.021
128.485	-42.022
128.627	-45.533
128.769	-48.667
128.912	-51.467
129.054	-54.307
129.196	-57.035
129.339	-58.806
129.481	-60.613
129.623	-61.819
129.765	-63.03
129.908	-63.357
130.05	-63.17
130.192	-62.985
130.335	-62.038
130.477	-60.869
130.619	-58.98
130.761	-56.819
130.904	-54.843
131.046	-52.277
131.188	-49.612
131.331	-46.868
131.473	-43.889
131.615	-41.389
131.757	-38.391
131.9	-35.817
132.042	-32.85
132.184	-30.297
132.327	-27.721
132.469	-25.33
132.611	-23.538
132.753	-21.366
132.896	-19.116
133.038	-17.669
133.18	-16.312
133.323	-14.635
133.465	-13.362
133.607	-11.739
133.749	-10.802
133.892	-9.739
134.034	-8.234
134.176	-7.447
134.319	-7.153
134.461	-6.355
134.603	-5.169
134.745	-4.809
134.888	-4.495
