# Supplementary material for: Complexes of vertebrate TMC1/2 and CIB2/3 proteins form hair-cell mechanotransduction cation channels
Source: eLife journal article supplement (doi:10.7554/elife.89719), 2023-08-18
Supplement: fig7-figsupp5-data1 [file S7516600qFWq15NhsCIB3KozDelqhsTMC1IL1q20220419.xls]

## Sheet: Curves
10
S75q16600qmicroplate004qFWq15NhsCIB3KozDelqhsTMC1IL1q04192022:10_UV
ml	mAU
0	38.238
0.143871	13.405
0.287742	25.765
0.431613	13.022
0.575484	6.077
0.719355	2.759
0.863226	0.858
1.0071	-0.101
1.15097	-0.21
1.29484	-1.06
1.43871	-1.472
1.58258	-1.754
1.72645	-2.394
1.87032	-2.483
2.01419	-3.142
2.15807	-3.056
2.30194	-3.601
2.44581	-3.507
2.58968	-4.093
2.73355	-3.811
2.87742	-4.102
3.02129	-4.446
3.16516	-4.651
3.30903	-5.102
3.4529	-4.705
3.59678	-5.028
3.74065	-5.116
3.88452	-5.218
4.02839	-5.194
4.17226	-5.392
4.31613	-5.412
4.46	-5.337
4.60387	-5.127
4.74774	-5.461
4.89161	-5.41
5.03549	-5.575
5.17936	-5.667
5.32323	-5.608
5.4671	-5.641
5.61097	-5.819
5.75484	-5.865
5.89871	-5.921
6.04258	-6.23
6.18645	-6.296
6.33033	-6.009
6.4742	-6.288
6.61807	-6.154
6.76194	-6.013
6.90581	-6.319
7.04968	-6.415
7.19355	-6.407
7.33742	-6.629
7.48129	-6.374
7.62516	-6.558
7.76904	-6.439
7.91291	-6.556
8.05678	-6.715
8.20065	-6.327
8.34452	-6.634
8.48839	-6.352
8.63226	-6.168
8.77613	-6.683
8.92	-6.755
9.06387	-6.682
9.20775	-6.605
9.35162	-6.566
9.49549	-6.764
9.63936	-6.629
9.78323	-6.806
9.9271	-6.687
10.071	-6.689
10.2148	-6.605
10.3587	-6.579
10.5026	-6.844
10.6465	-6.735
10.7903	-6.905
10.9342	-7.028
11.0781	-6.772
11.2219	-7.059
11.3658	-7.124
11.5097	-7.037
11.6536	-6.927
11.7974	-6.688
11.9413	-6.919
12.0852	-6.702
12.229	-6.912
12.3729	-6.861
12.5168	-7.208
12.6607	-7.382
12.8045	-7.529
12.9484	-7.528
13.0923	-7.399
13.2361	-7.522
13.38	-7.313
13.5239	-7.56
13.6677	-7.167
13.8116	-7.416
13.9555	-7.507
14.0994	-7.482
14.2432	-7.537
14.3871	-7.507
14.531	-7.445
14.6748	-7.752
14.8187	-7.364
14.9626	-7.496
15.1065	-7.249
15.2503	-7.426
15.3942	-7.523
15.5381	-7.452
15.6819	-7.447
15.8258	-7.556
15.9697	-7.832
16.1136	-7.675
16.2574	-7.553
16.4013	-7.559
16.5452	-7.944
16.689	-7.435
16.8329	-7.81
16.9768	-7.626
17.1207	-7.693
17.2645	-7.742
17.4084	-7.701
17.5523	-7.731
17.6961	-7.712
17.84	-8.008
17.9839	-8.202
18.1277	-7.819
18.2716	-8.012
18.4155	-8.324
18.5594	-8.253
18.7032	-8.065
18.8471	-8.188
18.991	-7.796
19.1348	-7.956
19.2787	-7.682
19.4226	-7.659
19.5665	-8.019
19.7103	-7.879
19.8542	-8.1
19.9981	-8.239
20.1419	-7.729
20.2858	-7.353
20.4297	-7.814
20.5736	-7.818
20.7174	-7.673
20.8613	-7.968
21.0052	-7.803
21.149	-7.589
21.2929	-7.763
21.4368	-7.939
21.5807	-8.012
21.7245	-8.292
21.8684	-7.939
22.0123	-8.102
22.1561	-7.85
22.3	-7.894
22.4439	-8.082
22.5878	-8.211
22.7316	-7.922
22.8755	-7.893
23.0194	-7.777
23.1632	-7.855
23.3071	-7.885
23.451	-7.877
23.5948	-8.019
23.7387	-7.649
23.8826	-7.704
24.0265	-8.036
24.1703	-8.059
24.3142	-7.981
24.4581	-7.959
24.6019	-7.981
24.7458	-8.148
24.8897	-8.106
25.0336	-8.061
25.1774	-8.233
25.3213	-8.149
25.4652	-8.327
25.609	-8.29
25.7529	-8.642
25.8968	-8.504
26.0407	-8.38
26.1845	-8.669
26.3284	-8.757
26.4723	-8.595
26.6161	-8.726
26.76	-8.863
26.9039	-8.632
27.0478	-8.62
27.1916	-8.674
27.3355	-8.702
27.4794	-8.543
27.6232	-8.421
27.7671	-8.964
27.911	-8.723
28.0548	-8.686
28.1987	-9.005
28.3426	-9.134
28.4865	-9.109
28.6303	-9.424
28.7742	-8.706
28.9181	-9.071
29.0619	-9.059
29.2058	-8.917
29.3497	-8.774
29.4936	-8.924
29.6374	-8.922
29.7813	-8.72
29.9252	-8.605
30.069	-8.687
30.2129	-8.464
30.3568	-8.91
30.5007	-8.65
30.6445	-8.765
30.7884	-8.879
30.9323	-8.891
31.0761	-8.919
31.22	-8.784
31.3639	-8.767
31.5078	-8.705
31.6516	-9.17
31.7955	-8.771
31.9394	-8.787
32.0832	-8.798
32.2271	-8.876
32.371	-9.06
32.5149	-8.712
32.6587	-8.474
32.8026	-8.707
32.9465	-8.627
33.0903	-8.884
33.2342	-8.728
33.3781	-8.651
33.5219	-8.809
33.6658	-9.007
33.8097	-9.081
33.9536	-9.085
34.0974	-8.899
34.2413	-9.056
34.3852	-9.255
34.529	-9.045
34.6729	-9.087
34.8168	-8.964
34.9607	-8.912
35.1045	-8.71
35.2484	-8.746
35.3923	-9.308
35.5361	-9.16
35.68	-9.008
35.8239	-9.236
35.9678	-9.049
36.1116	-9.358
36.2555	-9.187
36.3994	-9.255
36.5432	-9.34
36.6871	-9.306
36.831	-9.264
36.9749	-9.275
37.1187	-9.283
37.2626	-9.069
37.4065	-9.223
37.5503	-9.662
37.6942	-9.322
37.8381	-9.551
37.982	-9.525
38.1258	-9.217
38.2697	-9.178
38.4136	-9.15
38.5574	-9.403
38.7013	-9.244
38.8452	-9.401
38.989	-9.288
39.1329	-8.997
39.2768	-9.249
39.4207	-9.11
39.5645	-9.316
39.7084	-9.332
39.8523	-9.225
39.9961	-9.311
40.14	-9.271
40.2839	-8.869
40.4278	-8.674
40.5716	-7.694
40.7155	-7.022
40.8594	-5.572
41.0032	-3.129
41.1471	-0.052
41.291	3.782
41.4349	8.037
41.5787	13.048
41.7226	18.067
41.8665	24.259
42.0103	30.256
42.1542	37.151
42.2981	44.473
42.442	52.502
42.5858	60.346
42.7297	68.493
42.8736	78.014
43.0174	87.713
43.1613	98.365
43.3052	109.119
43.449	120.644
43.5929	131.859
43.7368	143.662
43.8807	154.629
44.0245	165.013
44.1684	174.849
44.3123	184.338
44.4561	193.301
44.6	200.605
44.7439	206.793
44.8878	211.047
45.0316	215.304
45.1755	217.27
45.3194	219.175
45.4632	219.691
45.6071	219.725
45.751	219.268
45.8949	217.62
46.0387	215.703
46.1826	212.679
46.3265	209.711
46.4703	206.371
46.6142	201.451
46.7581	196.735
46.902	191.747
47.0458	186.045
47.1897	179.381
47.3336	172.827
47.4774	165.896
47.6213	158.465
47.7652	151.786
47.9091	143.236
48.0529	136.397
48.1968	128.219
48.3407	120.159
48.4845	113.004
48.6284	105.041
48.7723	97.393
48.9161	89.905
49.06	82.835
49.2039	75.756
49.3478	68.525
49.4916	62.607
49.6355	55.997
49.7794	50.671
49.9232	45.828
50.0671	41.24
50.211	37.662
50.3549	34.337
50.4987	31.241
50.6426	28.986
50.7865	26.766
50.9303	24.912
51.0742	23.443
51.2181	21.945
51.362	20.85
51.5058	20.168
51.6497	19.36
51.7936	18.828
51.9374	18.225
52.0813	18.074
52.2252	17.702
52.3691	16.967
52.5129	16.69
52.6568	16.852
52.8007	16.638
52.9445	16.612
53.0884	16.717
53.2323	16.669
53.3761	16.75
53.52	16.835
53.6639	16.564
53.8078	16.714
53.9516	16.731
54.0955	16.948
54.2394	17.183
54.3832	16.883
54.5271	17.257
54.671	17.109
54.8149	17.143
54.9587	17.319
55.1026	17.137
55.2465	16.861
55.3903	17.138
55.5342	17.428
55.6781	17.217
55.822	17.187
55.9658	17.263
56.1097	17.033
56.2536	16.933
56.3974	16.671
56.5413	16.913
56.6852	16.925
56.8291	16.713
56.9729	16.576
57.1168	16.577
57.2607	16.573
57.4045	16.7
57.5484	17.013
57.6923	16.758
57.8362	16.499
57.98	16.53
58.1239	16.762
58.2678	16.725
58.4116	16.74
58.5555	16.499
58.6994	16.501
58.8432	16.245
58.9871	16.335
59.131	16.102
59.2749	16.066
59.4187	15.938
59.5626	15.977
59.7065	15.656
59.8503	15.848
59.9942	15.672
60.1381	15.604
60.282	15.364
60.4258	15.215
60.5697	14.799
60.7136	14.176
60.8574	14.103
61.0013	13.183
61.1452	13.174
61.2891	12.859
61.4329	12.455
61.5768	11.878
61.7207	11.882
61.8645	11.297
62.0084	11.026
62.1523	10.769
62.2962	10.612
62.44	10.309
62.5839	10.301
62.7278	9.859
62.8716	9.515
63.0155	9.429
63.1594	9.088
63.3033	9.024
63.4471	8.916
63.591	8.568
63.7349	8.549
63.8787	8.803
64.0226	8.66
64.1665	8.617
64.3103	8.599
64.4542	8.709
64.5981	8.95
64.742	9.054
64.8858	9.278
65.0297	9.105
65.1736	9.837
65.3174	10.346
65.4613	10.905
65.6052	11.428
65.7491	12.372
65.8929	13.266
66.0368	14.181
66.1807	15.978
66.3245	17.489
66.4684	19.632
66.6123	22.027
66.7562	24.733
66.9	27.96
67.0439	31.385
67.1878	35.918
67.3316	40.744
67.4755	46.144
67.6194	52.455
67.7633	58.971
67.9071	66.45
68.051	74.315
68.1949	82.864
68.3387	91.64
68.4826	100.968
68.6265	110.714
68.7703	120.353
68.9142	131.106
69.0581	140.532
69.202	150.875
69.3458	160.358
69.4897	169.994
69.6336	178.749
69.7774	187.525
69.9213	195.498
70.0652	203.15
70.2091	209.75
70.3529	215.598
70.4968	220.957
70.6407	224.998
70.7845	228.099
70.9284	230.426
71.0723	231.593
71.2162	232.884
71.36	233.188
71.5039	232.231
71.6478	230.498
71.7916	228.1
71.9355	225.21
72.0794	221.432
72.2233	216.934
72.3671	212.523
72.511	206.699
72.6549	200.932
72.7987	194.624
72.9426	187.409
73.0865	180.892
73.2304	172.749
73.3742	165.433
73.5181	158.078
73.662	149.743
73.8058	141.809
73.9497	133.514
74.0936	125.765
74.2374	117.949
74.3813	110.416
74.5252	103.195
74.6691	95.435
74.8129	88.921
74.9568	82.022
75.1007	75.569
75.2445	69.26
75.3884	63.336
75.5323	58.236
75.6762	52.709
75.82	48.351
75.9639	43.869
76.1078	39.413
76.2516	35.915
76.3955	31.89
76.5394	28.793
76.6833	26.227
76.8271	23.255
76.971	20.593
77.1149	18.188
77.2587	16.094
77.4026	14.632
77.5465	12.982
77.6904	11.374
77.8342	9.706
77.9781	8.258
78.122	7.374
78.2658	5.865
78.4097	5.009
78.5536	3.838
78.6974	3.356
78.8413	2.49
78.9852	1.851
79.1291	1.297
79.2729	1.413
79.4168	0.796
79.5607	0.083
79.7045	-0.283
79.8484	-0.82
79.9923	-0.84
80.1362	-1.171
80.28	-1.829
80.4239	-2.134
80.5678	-2.02
80.7116	-2.044
80.8555	-2.366
80.9994	-2.63
81.1433	-2.864
81.2871	-2.899
81.431	-3.07
81.5749	-3.601
81.7187	-3.788
81.8626	-3.563
82.0065	-3.52
82.1504	-3.529
82.2942	-3.8
82.4381	-4.187
82.582	-3.564
82.7258	-3.574
82.8697	-3.93
83.0136	-4.268
83.1575	-4.018
83.3013	-4.307
83.4452	-3.946
83.5891	-4.574
83.7329	-3.915
83.8768	-4.225
84.0207	-4.065
84.1645	-4.186
84.3084	-4.285
84.4523	-4.591
84.5962	-4.675
84.74	-4.284
84.8839	-4.163
85.0278	-4.279
85.1716	-4.048
85.3155	-4.294
85.4594	-4.34
85.6033	-3.974
85.7471	-4.346
85.891	-4.664
86.0349	-4.159
86.1787	-4.382
86.3226	-4.06
86.4665	-4.233
86.6104	-3.935
86.7542	-3.832
86.8981	-4.096
87.042	-4.143
87.1858	-3.93
87.3297	-3.653
87.4736	-3.945
87.6175	-3.877
87.7613	-3.763
87.9052	-3.566
88.0491	-3.436
88.1929	-3.954
88.3368	-3.57
88.4807	-3.468
88.6246	-3.794
88.7684	-3.864
88.9123	-3.318
89.0562	-3.762
89.2	-3.597
89.3439	-3.443
89.4878	-3.499
89.6316	-3.627
89.7755	-3.571
89.9194	-3.608
90.0633	-3.517
90.2071	-3.697
90.351	-3.793
90.4949	-3.601
90.6387	-3.473
90.7826	-3.237
90.9265	-3.469
91.0704	-3.44
91.2142	-3.694
91.3581	-3.524
91.502	-3.805
91.6458	-3.642
91.7897	-3.914
91.9336	-3.844
92.0775	-3.435
92.2213	-3.696
92.3652	-3.814
92.5091	-4.305
92.6529	-4.276
92.7968	-4.531
92.9407	-4.44
93.0846	-4.944
93.2284	-4.672
93.3723	-4.815
93.5162	-4.785
93.66	-4.424
93.8039	-4.937
93.9478	-4.818
94.0916	-4.662
94.2355	-4.732
94.3794	-4.551
94.5233	-4.675
94.6671	-4.87
94.811	-5.197
94.9549	-5.064
95.0987	-5.262
95.2426	-5.409
95.3865	-5.217
95.5304	-5.208
95.6742	-5.687
95.8181	-5.485
95.962	-5.294
96.1058	-5.639
96.2497	-5.353
96.3936	-5.494
96.5375	-5.325
96.6813	-5.264
96.8252	-5.108
96.9691	-5.179
97.1129	-5.269
97.2568	-5.604
97.4007	-5
97.5446	-5.212
97.6884	-5.378
97.8323	-5.355
97.9762	-5.22
98.12	-4.928
98.2639	-5.096
98.4078	-5.109
98.5517	-4.902
98.6955	-4.857
98.8394	-5.352
98.9833	-5.206
99.1271	-5.376
99.271	-5.439
99.4149	-5.41
99.5587	-5.203
99.7026	-5.63
99.8465	-5.514
99.9904	-5.668
100.134	-5.54
100.278	-5.736
100.422	-5.923
100.566	-6.108
100.71	-5.893
100.854	-5.746
100.997	-5.996
101.141	-6.228
101.285	-6.163
101.429	-6.649
101.573	-6.441
101.717	-6.499
101.861	-6.367
102.005	-6.249
102.148	-6.398
102.292	-6.026
102.436	-6.008
102.58	-5.318
102.724	-4.846
102.868	-4.575
103.012	-3.879
103.156	-3.153
103.299	-2.652
103.443	-1.91
103.587	-0.733
103.731	0.674
103.875	0.976
104.019	2.608
104.163	3.853
104.306	5.222
104.45	6.488
104.594	8.776
104.738	10.338
104.882	12.471
105.026	14.492
105.17	17.389
105.314	20.15
105.457	23.167
105.601	26.168
105.745	29.3
105.889	32.91
106.033	36.213
106.177	38.99
106.321	40.858
106.465	43.387
106.608	44.675
106.752	46.316
106.896	47.469
107.04	48.484
107.184	49.173
107.328	48.94
107.472	48.453
107.616	47.869
107.759	47.116
107.903	46.285
108.047	45.251
108.191	45.03
108.335	44.555
108.479	44.504
108.623	44.62
108.766	45.262
108.91	46.171
109.054	46.988
109.198	47.02
109.342	45.716
109.486	44.345
109.63	42.879
109.774	41.65
109.917	40.111
110.061	39.311
110.205	38.837
110.349	38.415
110.493	37.62
110.637	37.673
110.781	37.653
110.925	37.625
111.068	38.106
111.212	38.057
111.356	38.267
111.5	38.016
111.644	38.515
111.788	38.454
111.932	38.683
112.076	39.131
112.219	39.143
112.363	39.219
112.507	39.259
112.651	39.207
112.795	38.897
112.939	38.632
113.083	38.202
113.226	37.857
113.37	37.297
113.514	36.575
113.658	35.841
113.802	35.022
113.946	34.544
114.09	34.025
114.234	33.51
114.377	33.37
114.521	32.781
114.665	32.557
114.809	32.18
114.953	31.215
115.097	31.097
115.241	30.387
115.385	29.739
115.528	29.13
115.672	28.749
115.816	27.983
115.96	27.305
116.104	26.705
116.248	26.464
116.392	25.354
116.536	25.065
116.679	23.411
116.823	22.478
116.967	21.134
117.111	20.121
117.255	19.199
117.399	17.839
117.543	16.199
117.686	15.085
117.83	13.94
117.974	12.854
118.118	11.603
118.262	10.242
118.406	8.959
118.55	7.834
118.694	6.425
118.837	5.445
118.981	3.998
119.125	2.988
119.269	1.974
119.413	0.959
119.557	-0.215
119.701	-1.347
119.845	-1.896
119.988	-2.725
120.132	-3.883
120.276	-4.39
120.42	-5.101
120.564	-5.73
120.708	-6.172
120.852	-7.077
120.996	-7.43
121.139	-7.664
121.283	-8.083
121.427	-8.223
121.571	-8.47
121.715	-8.794
121.859	-9.235
122.003	-8.803
122.146	-9.386
122.29	-8.665
122.434	-9.104
122.578	-9.003
122.722	-8.993
122.866	-8.484
123.01	-8.28
123.154	-8.1
123.297	-7.957
123.441	-7.997
123.585	-7.496
123.729	-7.456
123.873	-7.139
124.017	-7.273
124.161	-6.668
124.305	-6.786
124.448	-6.869
124.592	-6.372
124.736	-6.586
124.88	-6.502
125.024	-7.123
125.168	-6.351
125.312	-6.424
125.456	-6.474
125.599	-6.679
125.743	-6.603
125.887	-7.148
126.031	-6.87
126.175	-7.214
126.319	-7.417
126.463	-7.57
126.607	-7.728
126.75	-7.79
126.894	-8.083
127.038	-8.497
127.182	-8.388
127.326	-8.851
127.47	-9.764
127.614	-10.143
127.757	-11.095
127.901	-11.818
128.045	-12.119
128.189	-12.76
128.333	-13.541
128.477	-14.114
128.621	-14.605
128.765	-15.232
128.908	-16.4
129.052	-16.836
129.196	-17.703
129.34	-18.055
129.484	-18.637
129.628	-19.383
129.772	-19.678
129.916	-20.398
130.059	-20.758
130.203	-21.357
130.347	-21.275
130.491	-22.077
130.635	-22.418
130.779	-22.155
130.923	-22.247
131.067	-22.409
131.21	-22.279
131.354	-22.425
131.498	-21.684
131.642	-21.755
131.786	-21.206
131.93	-21.014
132.074	-20.14
132.217	-20.104
132.361	-19.444
132.505	-18.603
132.649	-18.064
132.793	-17.019
132.937	-16.203
133.081	-15.583
133.225	-14.485
133.368	-13.598
133.512	-12.464
133.656	-11.453
133.8	-10.943
133.944	-10.016
134.088	-8.996
134.232	-8.369
134.376	-7.438
134.519	-7.199
134.663	-6.326
134.807	-5.584
134.951	-4.799
135.095	-4.264
135.239	-3.238
135.383	-2.374
135.527	-2.605
135.67	-1.894
135.814	-1.59
135.958	-1.603
136.102	-1.08
136.246	-0.72
136.39	-0.757
136.534	-0.197
136.677	-0.342
136.821	0.093
136.965	0.414
137.109	0.304
137.253	0.12
137.397	0.298
137.541	0.101
137.685	0.44
137.828	0.369
137.972	0.69
138.116	0.764
138.26	1.123
