# Supplementary material for: Complexes of vertebrate TMC1/2 and CIB2/3 proteins form hair-cell mechanotransduction cation channels
Source: eLife journal article supplement (doi:10.7554/elife.89719), 2023-08-18
Supplement: fig8-data1 [file elife-89719-fig8-data1-v1.pdf]

**Figure 8—source data 1. Summary of simulations**

| System                          | Label | Ca <sup>2+</sup> | Membrane           | Start | Length (ns) | Voltage (V) | Size (# of atoms) | Initial Size (nm <sup>3</sup> ) |
|---------------------------------|-------|------------------|--------------------|-------|-------------|-------------|-------------------|---------------------------------|
| <i>hs</i> TMC1 + <i>hs</i> CIB2 | S1a   | Yes              | POPC               | -     | 100         | 0†          | 395,283           | 16.1 x 16.1 x 16.6              |
|                                 | S1b   |                  |                    | S1a   | 100         | -0.5        |                   |                                 |
|                                 | S1c   |                  |                    | S1b   | 100         | -0.25       |                   |                                 |
|                                 | S1d   |                  |                    | S1a   | 960         | 0           |                   |                                 |
|                                 | S1e   |                  |                    | S1d   | 480         | -0.5        |                   |                                 |
|                                 | S1f   |                  |                    | S1e   | 480         | -0.25       |                   |                                 |
|                                 | S1g   |                  |                    | S1f   | 960         | -0.125      |                   |                                 |
| <i>hs</i> TMC1 + <i>hs</i> CIB2 | S2a   | No               | POPC               | -     | 100         | 0†          | 395,200           | 16.1 x 16.1 x 16.6              |
|                                 | S2b   |                  |                    | S2a   | 100         | -0.5        |                   |                                 |
|                                 | S2c   |                  |                    | S2b   | 100         | -0.25       |                   |                                 |
|                                 | S2d   |                  |                    | S2a   | 960         | 0           |                   |                                 |
|                                 | S2e   |                  |                    | S2d   | 480         | -0.5        |                   |                                 |
|                                 | S2f   |                  |                    | S2e   | 480         | -0.25       |                   |                                 |
|                                 | S2g   |                  |                    | S2f   | 960         | -0.125      |                   |                                 |
| <i>hs</i> TMC1                  | S3a   | -                | POPC               | -     | 100         | 0†          | 395,146           | 16.1 x 16.1 x 16.6              |
|                                 | S3b   |                  |                    | S3a   | 99.25       | -0.5        |                   |                                 |
|                                 | S3c   |                  |                    | S3b   | 100.875     | -0.25       |                   |                                 |
|                                 | S3d   |                  |                    | S3a   | 960         | 0           |                   |                                 |
|                                 | S3e   |                  |                    | S3d   | 480         | -0.5        |                   |                                 |
|                                 | S3f   |                  |                    | S3e   | 480         | -0.25       |                   |                                 |
|                                 | S3g   |                  |                    | S3f   | 960         | -0.125      |                   |                                 |
| <i>hs</i> TMC1 + <i>hs</i> CIB2 | S4a   | Yes              | Mixed <sup>a</sup> | -     | 100         | 0†          | 425,170           | 16.8 x 16.7 x 16.6              |
|                                 | S4b   |                  |                    | S4a   | 100         | -0.5        |                   |                                 |
|                                 | S4c   |                  |                    | S4a   | 240         | 0           |                   |                                 |
|                                 | S4d   |                  |                    | S4c   | 480         | -0.43       |                   |                                 |
|                                 | S4e   |                  |                    | S4c   | 720         | 0           |                   |                                 |
| <i>hs</i> TMC1 + <i>hs</i> CIB2 | S5a   | No               | Mixed <sup>a</sup> | -     | 100         | 0†          | 424,916           | 16.8 x 16.7 x 16.6              |
|                                 | S5b   |                  |                    | S5a   | 100         | -0.5        |                   |                                 |
| <i>hs</i> TMC1                  | S6a   | -                | Mixed <sup>a</sup> | -     | 100         | 0†          | 425,224           | 16.8 x 16.8 x 16.6              |
|                                 | S6b   |                  |                    | S6a   | 100         | -0.5        |                   |                                 |
| <i>hs</i> TMC1 + <i>hs</i> CIB3 | S7a   | Yes              | POPC               | -     | 100         | 0†          | 394,843           | 16.1 x 16.1 x 16.6              |
|                                 | S7b   |                  |                    | S7a   | 100         | -0.5        |                   |                                 |
| <i>hs</i> TMC1 + <i>hs</i> CIB3 | S8a   | No               | POPC               | -     | 100         | 0†          | 394,750           | 16.1 x 16.1 x 16.6              |
|                                 | S8b   |                  |                    | S8a   | 100         | -0.5        |                   |                                 |
|                                 | S8c   |                  |                    | S8b   | 100         | -0.25       |                   |                                 |
| <i>hs</i> TMC1 + <i>hs</i> CIB3 | S9a   | Yes              | Mixed <sup>a</sup> | -     | 100         | 0†          | 424,929           | 16.8 x 16.8 x 16.6              |
|                                 | S9b   |                  |                    | S9a   | 100         | -0.5        |                   |                                 |
| <i>hs</i> TMC1 + <i>hs</i> CIB3 | S10a  | No               | Mixed <sup>a</sup> | -     | 100         | 0†          | 425,005           | 16.8 x 16.7 x 16.6              |
|                                 | S10b  |                  |                    | S10a  | 100         | -0.5        |                   |                                 |
| <i>hs</i> TMC2 + <i>hs</i> CIB2 | S11a  | Yes              | POPC               | -     | 100         | 0†          | 434,265           | 16.8 x 16.9 x 16.7              |
|                                 | S11b  |                  |                    | S11a  | 100         | -0.5        |                   |                                 |
| <i>hs</i> TMC2 + <i>hs</i> CIB2 | S12a  | No               | POPC               | -     | 100         | 0†          | 433,630           | 16.9 x 16.9 x 16.6              |
|                                 | S12b  |                  |                    | S12a  | 100         | -0.5        |                   |                                 |
| <i>hs</i> TMC2                  | S13a  | -                | POPC               | -     | 100         | 0†          | 433,327           | 16.9 x 16.9 x 16.7              |
|                                 | S13b  |                  |                    | S13a  | 100         | -0.5        |                   |                                 |
| <i>hs</i> TMC2 + <i>hs</i> CIB2 | S14a  | Yes              | Mixed <sup>a</sup> | -     | 100         | 0†          | 427,357           | 16.8 x 16.8 x 16.5              |
|                                 | S14b  |                  |                    | S14a  | 100         | -0.5        |                   |                                 |
| <i>hs</i> TMC2 + <i>hs</i> CIB2 | S15a  | No               | Mixed <sup>a</sup> | -     | 100         | 0†          | 427,254           | 16.8 x 16.8 x 16.5              |
|                                 | S15b  |                  |                    | S15a  | 100         | -0.5        |                   |                                 |
| <i>hs</i> TMC2                  | S16a  | -                | Mixed <sup>a</sup> | -     | 100         | 0†          | 428,031           | 16.8 x 16.8 x 16.6              |
|                                 | S16b  |                  |                    | S16a  | 100         | -0.5        |                   |                                 |
| <i>hs</i> TMC2 + <i>hs</i> CIB3 | S17a  | Yes              | POPC               | -     | 100         | 0†          | 429,479           | 16.8 x 16.8 x 16.6              |
|                                 | S17b  |                  |                    | S17a  | 100         | -0.5        |                   |                                 |
| <i>hs</i> TMC2 + <i>hs</i> CIB3 | S18a  | No               | POPC               | -     | 100         | 0†          | 429,600           | 16.9 x 16.8 x 16.6              |
|                                 | S18b  |                  |                    | S18a  | 100         | -0.5        |                   |                                 |
| <i>hs</i> TMC2 + <i>hs</i> CIB3 | S19a  | Yes              | Mixed <sup>a</sup> | -     | 100         | 0†          | 428,972           | 16.8 x 16.8 x 16.6              |
|                                 | S19b  |                  |                    | S19a  | 100         | -0.5        |                   |                                 |
| <i>hs</i> TMC2 + <i>hs</i> CIB3 | S20a  | No               | Mixed <sup>a</sup> | -     | 100         | 0†          | 428,904           | 16.8 x 16.9 x 16.6              |
|                                 | S20b  |                  |                    | S20a  | 100         | -0.5        |                   |                                 |
| Total time                      |       |                  |                    |       | 14,480.125  |             |                   |                                 |

<sup>a</sup> a lipid membrane bilayer was comprised of 65% POPC, 30% cholesterol and 5% PIP2. † denotes equilibrium simulations that consisted of 2,000 steps of minimization, 0.5 ns of dynamics with everything excluding lipid tails fixed/constrained, 0.5 ns of dynamics with harmonic constraints applied to the protein (1 kcal mol<sup>-1</sup> Å<sup>-2</sup>), 1 ns of free dynamics in the *NpT* ensemble ( $\gamma = 1$  ps<sup>-1</sup>), and up to 100 ns of free dynamics in the *NpT* ensemble ( $\gamma = 0.1$  ps<sup>-1</sup>).
