# Supplementary material for: Complexes of vertebrate TMC1/2 and CIB2/3 proteins form hair-cell mechanotransduction cation channels
Source: eLife journal article supplement (doi:10.7554/elife.89719), 2023-08-18
Supplement: fig8-data2 [file elife-89719-fig8-data2-v1.pdf]

**Figure 8—source data 2. Ion conduction**

| Label | Length (ns) | Voltage (V) | K <sup>+</sup> (A) | K <sup>+</sup> (B) | Cl <sup>-</sup> (A) | Cl <sup>-</sup> (B) | I <sup>†</sup> (pA) | C <sup>†</sup> (pS) | BSA (Å <sup>2</sup> ) |
|-------|-------------|-------------|--------------------|--------------------|---------------------|---------------------|---------------------|---------------------|-----------------------|
| S1a   | 100         | 0           | -                  | -                  | -                   | -                   | -                   | -                   | 5,989.7               |
| S1b   | 100         | -0.5        | 1                  | 38                 | 0                   | 0                   | 62.4                | 124.8               | 5,595.7               |
| S1c   | 100         | -0.25       | 3                  | 21                 | 0                   | 0                   | 38.4                | 153.6               | -                     |
| S1d   | 960         | 0           | -                  | -                  | -                   | -                   | -                   | -                   | 4,876.7               |
| S1e   | 480         | -0.5        | 274                | 125                | 17                  | 0                   | 138.7               | 277.3               | 4,755.1               |
| S1f   | 480         | -0.25       | 92                 | 55                 | 1                   | 0                   | 49.3                | 197.3               | -                     |
| S1g   | 960         | -0.125      | 51                 | 37                 | 0                   | 0                   | 14.7                | 117.3               | -                     |
| S2a   | 100         | 0           | -                  | -                  | -                   | -                   | -                   | -                   | 5,661.8               |
| S2b   | 100         | -0.5        | 7                  | 23                 | 0                   | 1                   | 49.6                | 99.2                | 5,922.4               |
| S2c   | 100         | -0.25       | 3                  | 16                 | 0                   | 0                   | 30.4                | 121.6               | -                     |
| S2d   | 960         | 0           | -                  | -                  | -                   | -                   | -                   | -                   | 5,467.1               |
| S2e   | 480         | -0.5        | 303                | 183                | 6                   | 2                   | 164.7               | 329.3               | 5,385.7               |
| S2f   | 480         | -0.25       | 118                | 151                | 1                   | 1                   | 90.3                | 361.3               | -                     |
| S2g   | 960         | -0.125      | 1                  | 58                 | 0                   | 0                   | 9.8                 | 78.7                | -                     |
| S3a   | 100         | 0           | -                  | -                  | -                   | -                   | -                   | -                   | -                     |
| S3b   | 99.25       | -0.50       | 0                  | 39                 | 0                   | 0                   | 62.9                | 125.7               | -                     |
| S3c   | 100.875     | -0.25       | 1                  | 3                  | 0                   | 0                   | 6.3                 | 25.4                | -                     |
| S3d   | 960         | 0           | -                  | -                  | -                   | -                   | -                   | -                   | -                     |
| S3e   | 480         | -0.5        | 41                 | 24                 | 0                   | 0                   | 21.7                | 43.4                | -                     |
| S3f   | 480         | -0.25       | 8                  | 8                  | 0                   | 0                   | 5.3                 | 21.3                | -                     |
| S3g   | 960         | -0.125      | 3                  | 9                  | 0                   | 0                   | 2.0                 | 16.0                | -                     |
| S4a   | 100         | 0           | -                  | -                  | -                   | -                   | -                   | -                   | 5,903.7               |
| S4b   | 100         | -0.50       | 0                  | 0                  | 0                   | 0                   | 0.0                 | 0.0                 | 5,624.1               |
| S4c   | 240         | 0           | -                  | -                  | -                   | -                   | -                   | -                   | 5,084.2               |
| S4d   | 480         | -0.43       | 8                  | 0                  | 0                   | 0                   | 2.7                 | 6.2                 | 4,966.0               |
| S4e   | 720         | 0           | -                  | -                  | -                   | -                   | -                   | -                   | 5,039.4               |
| S5a   | 100         | 0           | -                  | -                  | -                   | -                   | -                   | -                   | 5,553.5               |
| S5b   | 100         | -0.50       | 7                  | 0                  | 0                   | 0                   | 11.2                | 22.4                | 5,530.2               |
| S6a   | 100         | 0           | -                  | -                  | -                   | -                   | -                   | -                   | -                     |
| S6b   | 100         | -0.50       | 3                  | 0                  | 0                   | 0                   | 4.8                 | 9.6                 | -                     |
| S7a   | 100         | 0           | -                  | -                  | -                   | -                   | -                   | -                   | 5,993.6               |
| S7b   | 100         | -0.50       | 3                  | 5                  | 0                   | 0                   | 12.8                | 25.6                | 5,912.3               |
| S8a   | 100         | 0           | -                  | -                  | -                   | -                   | -                   | -                   | 5,862.1               |
| S8b   | 100         | -0.50       | 43                 | 16                 | 0                   | 0                   | 94.4                | 188.8               | 6,069.5               |
| S8c   | 100         | -0.25       | 6                  | 11                 | 0                   | 0                   | 27.2                | 108.8               | -                     |
| S9a   | 100         | 0           | -                  | -                  | -                   | -                   | -                   | -                   | 5,977.6               |
| S9b   | 100         | -0.50       | 3                  | 2                  | 0                   | 0                   | 8.0                 | 16.0                | 5,806.4               |
| S10a  | 100         | 0           | -                  | -                  | -                   | -                   | -                   | -                   | 6,022.6               |
| S10b  | 100         | -0.50       | 0                  | 7                  | 0                   | 0                   | 11.2                | 22.4                | 6,121.8               |
| S11a  | 100         | 0           | -                  | -                  | -                   | -                   | -                   | -                   | 5,793.6               |
| S11b  | 100         | -0.50       | 1                  | 0                  | 0                   | 0                   | 1.6                 | 3.2                 | 5,718.4               |
| S12a  | 100         | 0           | -                  | -                  | -                   | -                   | -                   | -                   | 5,550.7               |
| S12b  | 100         | -0.50       | 9                  | 1                  | 0                   | 0                   | 16.0                | 32.0                | 5,741.5               |
| S13a  | 100         | 0           | -                  | -                  | -                   | -                   | -                   | -                   | -                     |
| S13b  | 100         | -0.50       | 4                  | 13                 | 0                   | 0                   | 27.2                | 54.4                | -                     |
| S14a  | 100         | 0           | -                  | -                  | -                   | -                   | -                   | -                   | 5,533.3               |
| S14b  | 100         | -0.50       | 0                  | 0                  | 0                   | 0                   | 0.0                 | 0.0                 | 5,404.3               |
| S15a  | 100         | 0           | -                  | -                  | -                   | -                   | -                   | -                   | 5,452.8               |
| S15b  | 100         | -0.50       | 7                  | 0                  | 0                   | 0                   | 11.2                | 22.4                | 5,586.2               |
| S16a  | 100         | 0           | -                  | -                  | -                   | -                   | -                   | -                   | -                     |
| S16b  | 100         | -0.50       | 9                  | 0                  | 0                   | 0                   | 14.4                | 28.8                | -                     |
| S17a  | 100         | 0           | -                  | -                  | -                   | -                   | -                   | -                   | 5,802.4               |
| S17b  | 100         | -0.50       | 6                  | 8                  | 0                   | 0                   | 22.4                | 44.8                | 6,018.6               |
| S18a  | 100         | 0           | -                  | -                  | -                   | -                   | -                   | -                   | 6,031.6               |
| S18b  | 100         | -0.50       | 9                  | 11                 | 0                   | 0                   | 32.0                | 64.0                | 6,322.5               |
| S19a  | 100         | 0           | -                  | -                  | -                   | -                   | -                   | -                   | 5,807.9               |
| S19b  | 100         | -0.50       | 12                 | 0                  | 0                   | 0                   | 19.2                | 38.4                | 5,797.2               |
| S20a  | 100         | 0           | -                  | -                  | -                   | -                   | -                   | -                   | 5,991.9               |
| S20b  | 100         | -0.50       | 0                  | 7                  | 0                   | 0                   | 11.2                | 22.4                | 6,122.6               |

<sup>†</sup> Currents, conductance, and average BSA values are reported for combined monomers A and B.
